# Supplementary material for: Chemoselective reduction of aldehydes via a combination of NaBH4 and acetylacetone
Source: Royal Society of Chemistry journal article supplement (doi:10.1039/c9nj03210j), 2019-01-01

## Supporting Information

### Chemoselective Reduction of Aldehyde via a Combination of NaBH<sub>4</sub> and Acetylacetone

Guoqing Sui, <sup>a</sup> Qingyun Lv, <sup>a</sup> Xiaoqing Song, <sup>a</sup> Huihui Guo, <sup>a</sup> Jiatong Dai, <sup>a</sup> Li Ren, <sup>a</sup> Chi-Sing Lee,  
<sup>d</sup> Wenming Zhou\*<sup>a</sup> and Hong-Dong Hao\*<sup>abc</sup>

<sup>a</sup>Shaanxi Key Laboratory of Natural Products & Chemical Biology, College of Chemistry & Pharmacy,  
Northwest A&F University, Yangling, Shaanxi 712100, China

<sup>b</sup>State Key Laboratory of Bioorganic & Natural Products Chemistry, Shanghai Institute of Organic  
Chemistry, Chinese Academy of Sciences, Shanghai 200032, China

<sup>c</sup>Key Laboratory of Chemical Genomics, School of Chemical Biology and Biotechnology, Peking University,  
Shenzhen Graduate School, Shenzhen 518055, China

<sup>d</sup>Department of Chemistry, Hong Kong Baptist University, Kowloon Tong, Hong Kong SAR, China

#### Table of Contents

|                                                                  |            |
|------------------------------------------------------------------|------------|
| <b>1. General Experimental Details.....</b>                      | <b>S2</b>  |
| <b>1.1. Materials.....</b>                                       | <b>S2</b>  |
| <b>1.2. Instrumentation.....</b>                                 | <b>S2</b>  |
| <b>2. Experimental Procedures.....</b>                           | <b>S3</b>  |
| <b>2.1. Preparation of the combination.....</b>                  | <b>S3</b>  |
| <b>2.2. General procedure for selective reduction.....</b>       | <b>S4</b>  |
| <b>2.3. Experimental procedure for preparing substrates.....</b> | <b>S5</b>  |
| <b>3. Data for reduction product.....</b>                        | <b>S24</b> |
| <b>4. References.....</b>                                        | <b>S38</b> |
| <b>5. <sup>1</sup>H and <sup>13</sup>C NMR Spectra.....</b>      | <b>S39</b> |

## 1. General Experimental Details

Unless otherwise stated, all reactions were performed with magnetic stirring under a positive pressure of nitrogen or argon gas. Over-dried glassware (over temperature of 70 °C) was further dried with a heat-gun at 650 °C under vacuum, followed by back-filling with inert gas, three times and fitted with rubber septa prior to use. Solids were added under inert gas counter flow or were dissolved and transferred in the appropriate solvent. Solutions and liquids reagents were transferred to reaction vessels by oven-dried stainless-steel cannulas or nitrogen flushed syringes. Low temperature reactions were carried out in a Dewar vessel filled with acetone/dry ice (−78 °C) or distilled water/ice (0 °C). High temperature reactions were conducted using a heated silicon oil bath in reaction vessels equipped with a reflux condenser.

### 1.1 Materials

Dry Tetrahydrofuran (THF), diethyl ether (Et<sub>2</sub>O) Dichloromethane (CH<sub>2</sub>Cl<sub>2</sub>), triethylamine (Et<sub>3</sub>N) and N,N-dimethylformamide (DMF), toluene (PhMe), dioxane and methanol (MeOH) were purchased from Tansoole company as extra dry reagents under inert gas atmosphere and stored over molecular sieves. Ethyl acetate (EtOAc), pentane, Et<sub>2</sub>O, CH<sub>2</sub>Cl<sub>2</sub> and MeOH used specifically for extraction and flash column chromatography were purchased at technical grade from commercial sources and distilled under reduced pressure. All other solvents and reagents were used as received from commercial sources (Sigma Aldrich, Energy chemical, 3A, Innochem, and Adamas).

Reactions were monitored by thin-layer chromatography (TLC) using silica gel F254 pre-coated glass plates (*Merck*) and visualized by exposure to ultraviolet light ( $\lambda = 254$  nm) or by staining with aqueous potassium permanganate (KMnO<sub>4</sub>) solution (7.5 g KMnO<sub>4</sub>, 50 g K<sub>2</sub>CO<sub>3</sub>, 6.25 mL aqueous 10% NaOH, 1000 mL distilled H<sub>2</sub>O), aqueous acid ceric ammonium molybdate (IV) (CAM) solution (2.0 g Ce(NH<sub>4</sub>)<sub>4</sub>(SO<sub>4</sub>)<sub>4</sub>·2H<sub>2</sub>O, 48 g (NH<sub>4</sub>)<sub>6</sub>Mo<sub>7</sub>O<sub>24</sub>·4H<sub>2</sub>O, 60 mL concentrated sulfuric acid, 940 mL distilled H<sub>2</sub>O) followed by heating with a heat gun (150-600 °C). Flash column chromatography was performed using silica gel (60 Å, 40-63 µm, *Merck*) and a forced flow of eluent.

### 1.2 Instrumentation

Proton (<sup>1</sup>H) and carbon (<sup>13</sup>C) nuclear magnetic resonance spectra were recorded on a

Brucker Avance III HD 500 MHz spectrometer equipped with a CroProbe<sup>TM</sup>. Proton chemical shifts are expressed in parts per million (ppm,  $\delta$  scale) and referenced to residual undeuterated solvent signals (CDCl<sub>3</sub>: 7.26 ppm; C<sub>6</sub>D<sub>6</sub>: 7.16 ppm). Carbon chemical shifts are expressed in parts per million (ppm,  $\delta$  scale) and referenced to the central carbon resonance of the solvent (CDCl<sub>3</sub>: 77.16 ppm; C<sub>6</sub>D<sub>6</sub>: 128.06 ppm). The reported data is represented as follows: chemical shift in parts per million (ppm,  $\delta$  scale) (multiplicity, coupling constants  $J$  in Hz, integration intensity, proton assignment). Abbreviations used for analysis of multiplets are as follows: s (singlet), br s (broad singlet), d (doublet), t (triplet), q (quartet), quin (quintet), h (hextet), and m (multiplet). Variable temperature NMR spectroscopy was performed at the *Northwest A&F University* NMR facility.

Mass spectroscopy (MS) experiments were performed in high resolution with an AB SCIEX Triple TOF 5600<sup>+</sup> spectrometer (AB SCIEX, Boston, MA, USA) at the *Northwest A&F University* mass spectrometry facility.

## 2. Experimental Procedures

### 2.1 Preparation of the combination:

To a stirred solution of NaBH<sub>4</sub> (1.89 g, 50.0 mmol) in dry THF (80 mL) at 0 °C was added acetylacetone (4.1 mL, 40.0 mmol) dropwise. After stirred at 0 °C for 10 min, the reaction mixture was warm to room temperature slowly and stirred for further 2 h. Then the solvent was concentration in vacuo to afford the combination (5.20 g, 88% yield) as a white power. FT-IR (KBr) 3403, 2968, 2928, 2661, 2368, 2289, 2225, 1625, 1510, 1456, 1412, 1378, 1234, 1156, 1126, 1055, 977, 915, 761, 657, 643 cm<sup>-1</sup>. Anal. calcd for C<sub>5</sub>H<sub>13</sub>B<sub>1.25</sub>Na<sub>1.25</sub>O<sub>3</sub> (or alternatively written in a more informative manner, C<sub>5</sub>H<sub>7</sub>O<sub>2</sub>·NaBH<sub>3</sub>·H<sub>2</sub>O·0.25NaBH<sub>4</sub>): C 36.75, H 8.02, B 8.27, Na 17.59, O 29.37; found C 36.26, H 8.21, B 8.04, Na 16.03.

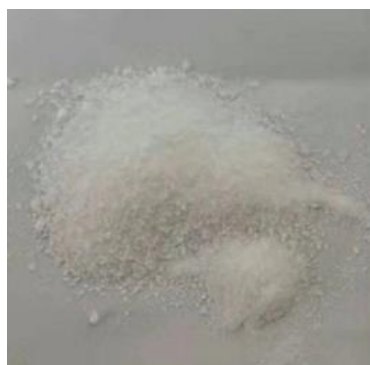

**Figure S1.** Prepared combination for reduction

The combination of NaBH<sub>4</sub> (1.25 equiv) with acac (1 mmol) is important for the selective reduction, when NaBH<sub>4</sub>: acac = 1:1, a sticking solid was obtained, not easy to weigh, while when NaBH<sub>4</sub>: acac = 1.5:1, a white power was obtained, but the combination is too reactive for the selective reduction.

Control experiment was also carried out use only NaBH<sub>4</sub> in THF without acac, which shows inferior yield.

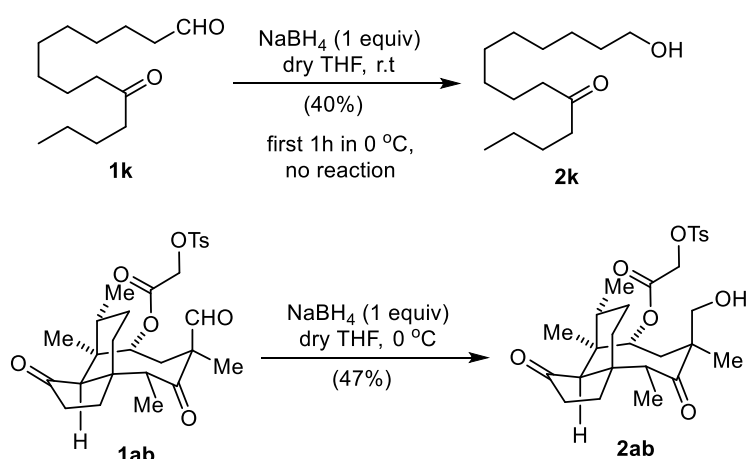

## 2.2 General Procedure for selective reduction:

To a stirred solution of ketoaldehyde **1** (1.0 mmol) in dry THF (5 mL) at 0 °C was added the NaBH<sub>4</sub>·acac solid (138 mg, 1.0 mmol). After the reaction was completed according to the TLC, the reaction mixture was quenched by addition of sat.aq.NH<sub>4</sub>Cl (2 mL) and followed by extraction with EtOAc (2×10 mL), the combined organic layers were washed with brine and dried over anhydrous Na<sub>2</sub>SO<sub>4</sub>. After filtration and concentration in vacuo, the crude product was purified by flash column chromatography on silica to afford the desired target compounds.

### Representative procedure taking **1a** as the example:

To a stirred solution of **1a** (148 mg, 1.0 mmol) in dry THF (5 mL) at 0 °C was added the NaBH<sub>4</sub>·acac solid (138 mg, 1.0 mmol), after stirred for 12 min, the reaction mixture was quenched by addition of sat.aq.NH<sub>4</sub>Cl (2 mL) followed by extraction with EtOAc (2×10 mL), the combined organic layers were washed with brine and dried over anhydrous Na<sub>2</sub>SO<sub>4</sub>. After filtration and concentration in vacuo, the crude product was purified by flash column

chromatography (Hexanes : EtOAc = 3 : 1) on silica to afforded the desired target compound **2a** (142 mg, 0.95 mmol, 95%) as yellow oil.

#### Small scale taking **1i** as the example:

To a stirred solution of **1i** (130 mg, 0.70 mmol) in dry THF (5 mL) at 0 °C was added the NaBH<sub>4</sub>·acac solid (97 mg, 0.70 mmol). After the reaction was completed in 15 min according to the TLC detection, the reaction mixture was quenched by addition of sat.aq.NH<sub>4</sub>Cl (1 mL) and followed by extraction with EtOAc (2×7 mL), the combined organic layers were washed with brine and dried over anhydrous Na<sub>2</sub>SO<sub>4</sub>. After filtration and concentration in vacuo, the crude product was purified by flash column chromatography (Hexanes : EtOAc = 4 : 1) on silica to afforded the desired target compound **2i** (113 mg, 0.61 mmol, 87%) as white soli

#### Gram Scale:

To a stirred solution of **1i** (1.10 g, 6.0 mmol) in dry THF (25 mL) at 0 °C was added the NaBH<sub>4</sub>·acac solid (830 mg, 6.0 mmol), and. After the reaction was completed according to the TLC detection, the reaction mixture was quenched by addition of sat.aq.NH<sub>4</sub>Cl (3 mL) and followed by extraction with EtOAc (2×25 mL), the combined organic layers were washed with brine and dried over anhydrous Na<sub>2</sub>SO<sub>4</sub>. After filtration and concentration in vacuo, the crude product was purified by flash column chromatography (Hexanes : EtOAc = 4 : 1) on silica to afforded the desired target compound **2i** (0.92 g, 4.95 mmol, 83%) as white solid.

## 2.3 Experimental procedure for preparing substrates:

### Procedure 1 (**1a** to **1f**):

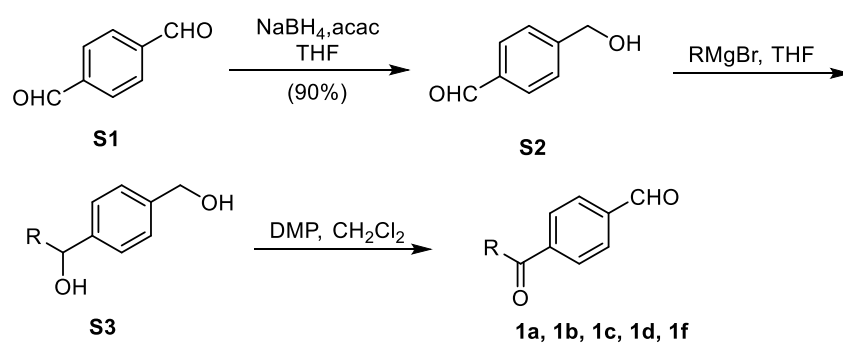

Representative procedure for P1, taking **1a** as the example

- To a stirred solution of terephthalaldehyde (134 mg, 1.0 mmol) in dry THF (5 mL) at 0 °C was added the NaBH<sub>4</sub>·acac solid (138 mg, 1.0 mmol), after stirred for 5 min, the reaction mixture was quenched by addition of sat.aq.NH<sub>4</sub>Cl (3 mL) and followed by extraction with EtOAc (2×10 mL), the combined organic layers were washed with brine and dried over anhydrous Na<sub>2</sub>SO<sub>4</sub>. After filtration and concentration in vacuo, the crude product was purified by flash column chromatography (hexanes: EtOAc = 3:1) on silica to afforded **S2** (122 mg, 0.90 mmol, 90%) as a light yellow oil.

To a stirred solution of **S2** (68 mg, 0.5 mmol) in dry THF (5 mL) at – 5 °C (ice/acetone bath) was added MeMgBr (0.5 mL, 1.5 mmol, 3 mmol/mL solution in Et<sub>2</sub>O), and stirred for 2 h. Then the reaction mixture was quench by addition of sat.aq.NH<sub>4</sub>Cl (3 mL) and followed by extraction with EtOAc (2×10 mL), the combined organic layers were washed with brine and dried over anhydrous Na<sub>2</sub>SO<sub>4</sub>. After filtration and concentration in vacuo, the crude product was purified by flash column chromatography (hexanes: EtOAc = 2:1) on silica to afforded **S3a** (53 mg, 0.35 mmol, 69%) as a colorless oil.

To a stirred solution of diol **S3a** (76 mg, 0.5 mmol) in CH<sub>2</sub>Cl<sub>2</sub> (10 mL) at 0 °C was added Dess-Martin periodinane (850 mg, 2 mmol) and stirred for 2 h, then the reaction mixture was quench by addition of sat.aq.NaCl (3 mL) and followed by extraction with EtOAc (2×10 mL), the combined organic layers were washed with 1 N NaOH solution (10 mL) and brine (5 mL) dried over anhydrous Na<sub>2</sub>SO<sub>4</sub>. After filtration and concentration in vacuo, the crude product was purified by flash column chromatography (hexanes: EtOAc = 4:1) on silica to afforded **1a** (59 mg, 0.40 mmol, 80%) as a pale yellow oil.

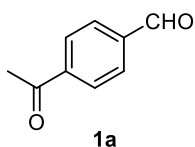

**Compound 1a.** CAS No. 3457-45-2. Pale yellow oil.

The analytical data of **1a** was in accordance to the reported.<sup>[1]</sup>

**<sup>1</sup>H NMR (500 MHz, CDCl<sub>3</sub>):** δ = 10.10 (s, 1H), 8.09 (d, *J* = 8.1 Hz, 2H), 7.97 (d, *J* = 8.1 Hz, 2H), 2.65 (s, 3H) ppm

**Compound 1b, 1c, 1d, 1e, 1f** were synthesized according to the Procedure 1.

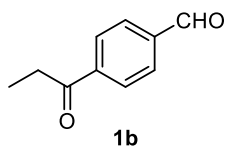

**Compound 1b.** CAS No. 208453-24-1. White needle crystal.

The analytical data of **1b** was in accordance to the reported.<sup>[1]</sup>

**<sup>1</sup>H NMR (500 MHz, CDCl<sub>3</sub>):**  $\delta$  = 10.11 (s, 1H), 8.11 (d,  $J$  = 8.2 Hz, 2H), 7.98 (d,  $J$  = 8.2 Hz, 2H), 3.05 (q,  $J$  = 7.2 Hz, 2H), 1.26 (t,  $J$  = 7.2 Hz, 3H) ppm

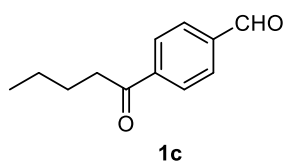

**Compound 1c.** CAS No. 61363-43-7. White needle crystal.

The analytical data of **1c** was in accordance to the reported.<sup>[2]</sup>

**<sup>1</sup>H NMR (500 MHz, CDCl<sub>3</sub>):**  $\delta$  = 10.11 (s, 1H), 8.10 (d,  $J$  = 8.2 Hz, 2H), 7.98 (d,  $J$  = 8.4 Hz, 2H), 3.01 (t,  $J$  = 7.2 Hz, 2H), 1.77 – 1.71 (m, 2H), 1.46 – 1.39 (m, 2H), 0.97 (t,  $J$  = 7.4 Hz, 3H) ppm

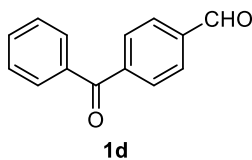

**Compound 1d.** CAS No. 20912-50-9. White needle crystal.

The analytical data of **1d** was in accordance to the reported one.<sup>[1]</sup>

**<sup>1</sup>H NMR (500 MHz, CDCl<sub>3</sub>):**  $\delta$  = 10.14 (s, 1H), 8.01 (d,  $J$  = 8.0 Hz, 2H), 7.93 (d,  $J$  = 7.7 Hz, 2H), 7.81 (d,  $J$  = 7.7 Hz, 2H), 7.64 (t,  $J$  = 7.3 Hz, 1H), 7.52 (t,  $J$  = 7.3 Hz, 2H) ppm

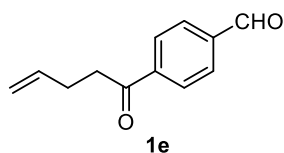

**Compound 1e** was synthesized as yellow oil.

**<sup>1</sup>H NMR (500 MHz, CDCl<sub>3</sub>):**  $\delta$  = 10.01 (s, 1H), 8.00 (d,  $J$  = 8.1 Hz, 2H), 7.88 (d,  $J$  = 8.2 Hz, 2H), 5.84 – 5.76 (m, 1H), 5.00 (d,  $J$  = 17.2 Hz, 1H), 4.93 (d,  $J$  = 10.2 Hz, 1H), 3.02 (t,  $J$  = 7.4 Hz, 2H), 2.44 – 2.40 (m, 2H) ppm

**$^{13}\text{C}$  NMR (125 MHz,  $\text{CDCl}_3$ ):**  $\delta$  = 198.8, 191.6, 141.2, 139.0, 136.9, 129.9, 128.6, 115.7, 38.3, 27.9 ppm

**HRMS (APCI)** for  $\text{C}_{12}\text{H}_{11}\text{O}_2$ ,  $[\text{M}-\text{H}]^-$ : calcd.187.0764, found: 187.0760.

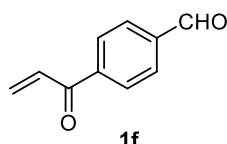

**Compound 1f** was synthesized as pale yellow flaky solid.

**$^1\text{H}$  NMR (500 MHz,  $\text{CDCl}_3$ )**  $\delta$  = 10.12 (s, 1H), 8.07 (d,  $J$  = 8.7 Hz, 2H), 8.00 (d,  $J$  = 8.3 Hz, 2H), 7.17-7.11 (m, 1H), 6.47 (d,  $J$  = 17.3 Hz, 1H), 6.03 (d,  $J$  = 10.9 Hz, 1H) ppm

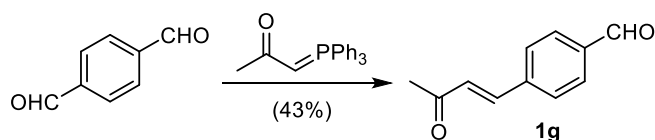

To a stirred solution of terephthalaldehyde (268 mg, 2.0 mmol) in dry THF (8 mL) was added (acetylmethylene)triphenylphosphorane (700 mg, 2.2 mmol), then the reaction mixture heated to 60 °C and stirred for 10 h. Directly concentrated and purified by preparative TLC plates (hexanes: EtOAc = 5:1) to afford **1g** (150 mg, 0.86 mmol, 43% yield) as a white crystal.

The product **1g** is a mixture of the E/Z isomer, the ratio is E:Z = 6:1.

The analytical data of **1g** was in accordance to the reported one. <sup>[3]</sup>

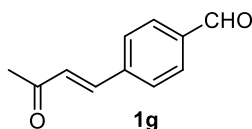

**$^1\text{H}$  NMR (500 MHz,  $\text{CDCl}_3$ )**  $\delta$  = 10.04 (s, 1H), 7.92 (d,  $J$  = 8.2 Hz, 2H), 7.70 (d,  $J$  = 8.2 Hz, 2H), 7.54 (d,  $J$  = 16.3 Hz, 1H), 6.82 (d,  $J$  = 16.3 Hz, 1H), 2.42 (s, 3H) ppm

**Procedure 2 (1i to 1l):**

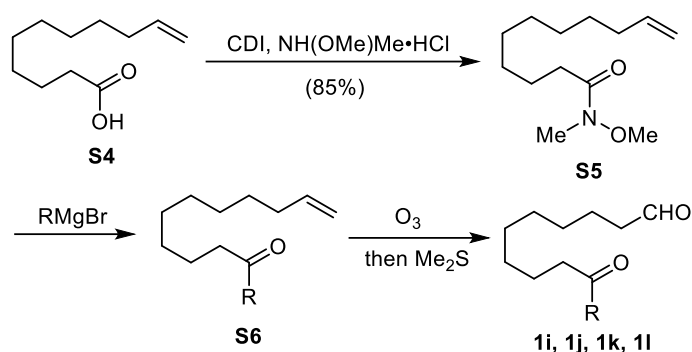

Representative procedure for P2, taking **1i** as the example.

To a stirred solution of 10-undecenoic acid (2.76 g, 15 mmol) in dry  $\text{CH}_2\text{Cl}_2$  (50 mL) at 0 °C was added CDI (3.16 g, 19.5 mmol), after stirred for 30 min,  $\text{HN}(\text{OMe})\text{Me}\cdot\text{HCl}$  (3.66 g, 37.5 mmol) was added, stirred at r.t for 24 h. The reaction mixture was filtered and washed with  $\text{CH}_2\text{Cl}_2$  (3×20 mL), then the combined organic layers washed with 1N HCl (10 mL), brine and dried over anhydrous  $\text{Na}_2\text{SO}_4$ . Concentrated and flash chromatography (hexanes : EtOAc = 5 : 1) to afford product **S5** (2.90 g, 12.75 mmol, 85%) as a colorless oil.

To a stirred solution of above Weinreb amide **S5** (245 mg, 1.08 mmol) in dry THF (8 mL) at 0 °C was added  $\text{MeMgBr}$  (0.72 mL, 2.16 mmol, 3 mmol/mL solution in  $\text{Et}_2\text{O}$ ), after stirred for 3 h, the reaction mixture quench with  $\text{NH}_4\text{Cl}$  (5 mL), extract with EtOAc (3×20 mL). The combined organic layers were washed with brine and dried over anhydrous  $\text{Na}_2\text{SO}_4$ . Concentrated and flash chromatography (hexanes: EtOAc = 25: 1) to afford product **S6** (104 mg, 0.71 mmol, 66%) as a colorless oil.

$\text{O}_3$  was bubbled through a stirred solution of the above product **S6** (182 mg, 1.0 mmol) in  $\text{CH}_2\text{Cl}_2$  (10 mL) at – 78 °C until the reaction mixture color change into blue, an Ar balloon was bubbled to the solution followed by  $\text{Me}_2\text{S}$  (0.44 mL, 6.0 mmol) was added, then stirred at r.t for 12 h. The reaction mixture was directly concentrated and flash chromatography (hexanes: EtOAc = 10: 1) to afford product **1i** (129 mg, 0.70 mmol, 70%) as a white powder.

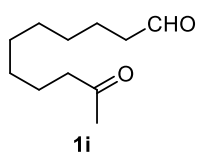

The analytical data of **1i** was in accordance to the reported one. <sup>[4]</sup>

**<sup>1</sup>H NMR (500 MHz, CDCl<sub>3</sub>):**  $\delta$  = 9.76 (s, 1H), 2.43 – 2.39 (m, 4H), 2.13 (s, 3H), 1.66 – 1.52 (m, 4H), 1.34 – 1.23 (m, 8H) ppm

**Compound 1j, 1k, 1l were synthesized according to the Procedure 2.**

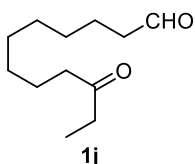

**Compound 1j** was synthesized as white flaky crystal.

The analytical data of **1j** was in accordance to the reported one. <sup>[4]</sup>

**<sup>1</sup>H NMR (500 MHz, CDCl<sub>3</sub>):**  $\delta$  = 9.76 (s, 1H), 2.42 – 2.38 (m, 6H), 1.62 – 1.56 (m, 4H), 1.34 – 1.22 (m, 8H), 1.05 (t,  $J$  = 7.6 Hz, 3H) ppm

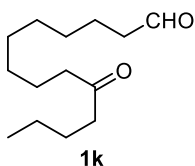

**Compound 1k** was synthesized as white flaky crystal.

The analytical data of **1k** was in accordance to the reported one. <sup>[4]</sup>

**<sup>1</sup>H NMR (500 MHz, CDCl<sub>3</sub>):**  $\delta$  = 9.76 (s, 1H), 2.43 – 2.37 (m, 6H), 1.65 – 1.58 (m, 2H), 1.58 – 1.51 (m, 4H), 1.33 – 1.24 (m, 10H), 0.90 (t,  $J$  = 7.5 Hz, 3H) ppm

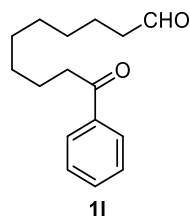

**Compound 1l** was synthesized as white flaky crystal.

The analytical data of **1l** was in accordance to the reported one. <sup>[4]</sup>

**<sup>1</sup>H NMR (500 MHz, CDCl<sub>3</sub>):**  $\delta$  = 9.76 (s, 1H), 7.96 (d,  $J$  = 7.4 Hz, 2H), 7.57 – 7.54 (m, 1H), 7.46

(t,  $J = 7.4$  Hz, 2H), 2.96 (t,  $J = 7.4$  Hz, 2H), 2.42 (t,  $J = 7.3$  Hz, 2H), 1.78 – 1.69 (m, 2H), 1.67 – 1.59 (m, 2H), 1.41 – 1.29 (m, 8H) ppm

### Procedure 3 (1m to 1p):

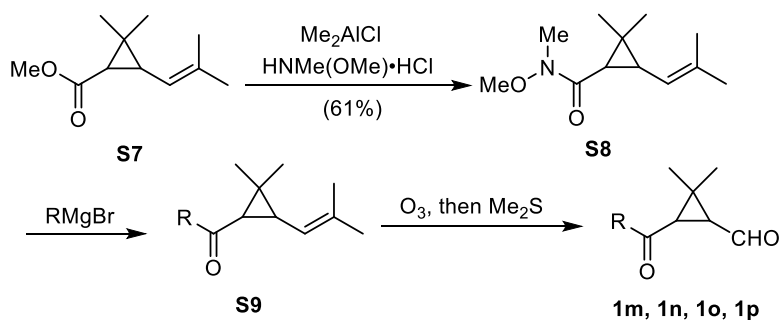

Representative procedure for P3, taking **1m** as the example

To a stirred solution of  $\text{HNMe(OMe)}\cdot\text{HCl}$  (1.46 g, 15 mmol) in dry  $\text{CH}_2\text{Cl}_2$  (50 mL) at 0 °C was added  $\text{Me}_2\text{AlCl}$  (15 mL, 1.0 mmol/mL solution in heptane, 15 mmol), then the reaction mixture stirred at r.t for 1 h. A solution of ethyl chrysanthemumate (1.62 mL, 7.5 mmol) in dry  $\text{CH}_2\text{Cl}_2$  (5 mL) was added to the reaction mixture dropwise and stirred overnight (12 h). Quench the reaction with buffer (pH = 8, 5 mL) and then saturated Rochelle salt solution (50 mL) was added. Stirred for 1 h at r.t until the layers were clear and then extract with EtOAc (3×20 mL). The combined organic layers were washed with brine and dried over anhydrous  $\text{Na}_2\text{SO}_4$ . Concentrated and flash chromatography (hexanes: EtOAc = 25:1) to afford product **S8** (970 mg, 4.58 mmol, 61%) as a colorless oil.

To a stirred solution of the above weinreb amide (200 mg, 0.95 mmol) in dry THF (8 mL) at 0 °C was added  $\text{MeMgBr}$  (0.63 mL, 3.0 mmol/mL solution in  $\text{Et}_2\text{O}$ , 1.90 mmol), the reaction mixture stirred at 0 °C for 3 h and then quench with aq  $\text{NH}_4\text{Cl}$  (5 mL), extract with EtOAc (3×20 mL). The combined organic layers were washed with brine and dried over anhydrous  $\text{Na}_2\text{SO}_4$ . Concentrated and flash chromatography (hexanes: EtOAc = 100: 1) to afford product **S9** (104 mg, 0.63 mmol, 66%) as a colorless oil.

$\text{O}_3$  was bubbled through a stirred solution of the above product (166 mg, 1.0 mmol) in  $\text{CH}_2\text{Cl}_2$  (10 mL) at – 78 °C until the reaction mixture color change into blue, an Ar balloon was bubbled to the solution followed by  $\text{Me}_2\text{S}$  (0.44 mL, 6.0 mmol) was added, then stirred at r.t for 12 h. The reaction mixture was directly concentrated and flash chromatography (hexanes:

EtOAc = 20: 1) to afford product **1m** (82 mg, 0.58 mmol, 58%) as a pale yellow oil.

Due to the starting material ethyl chrysanthemumate is a 1:1 mixture of cis: trans, Compound **1m,1o,1p** and **1q** were obtained as a 1:1 mixture of cis: trans.

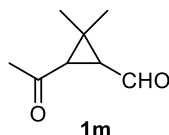

**<sup>1</sup>H NMR (500 MHz, CDCl<sub>3</sub>):**  $\delta$  = 9.62 (d,  $J$  = 2.3 Hz, 1H), 2.76 (d,  $J$  = 5.3 Hz, 1H), 2.64 (s, 1H), 2.28 (s, 3H), 1.33 (s, 3H), 1.23 (s, 3H) ppm

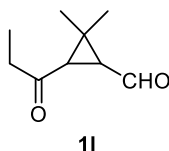

**Compound 1l** was synthesized as colorless oil.

**<sup>1</sup>H NMR (500 MHz, CDCl<sub>3</sub>):**  $\delta$  = 9.63 (d,  $J$  = 3.1 Hz, 1H), 2.75 (d,  $J$  = 5.5 Hz, 1H), 2.66 – 2.64 (m, 1H), 2.60–2.55 (m, 2H), 1.34 (s, 3H), 1.22 (s, 3H), 1.08 (t,  $J$  = 7.3 Hz, 3H) ppm

**<sup>13</sup>C NMR (125 MHz, CDCl<sub>3</sub>):**  $\delta$  = 205.9, 198.8, 42.3, 41.4, 38.0, 35.4, 21.0, 20.0, 7.8 ppm

**HRMS (APCI)** for C<sub>9</sub>H<sub>15</sub>O<sub>2</sub>, [M+H]<sup>+</sup>: calcd. 155.1067, found: 155.1064.

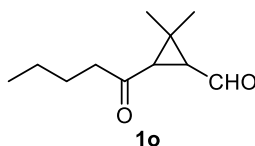

**Compound 1o** was synthesized as pale yellow oil.

**<sup>1</sup>H NMR (500 MHz, CDCl<sub>3</sub>):**  $\delta$  = 9.60 (d,  $J$  = 3.2 Hz, 1H), 2.72 (d,  $J$  = 5.8 Hz, 1H), 2.63 – 2.61 (m, 1H), 2.51 (t,  $J$  = 7.6 Hz, 2H), 1.58 – 1.51 (m, 2H), 1.34 – 1.27 (m, 5H), 1.18 (s, 3H), 0.89 (t,  $J$  = 7.6 Hz, 3H) ppm

**<sup>13</sup>C NMR (125 MHz, CDCl<sub>3</sub>):**  $\delta$ : 205.6, 198.8, 44.6, 42.3, 41.6, 35.6, 25.9, 22.3, 21.0, 20.0, 13.8 ppm

**HRMS (APCI)** for  $C_{10}H_{17}O$ ,  $[M-CHO]^-$ : calcd. 153.1285, found: 153.1287.

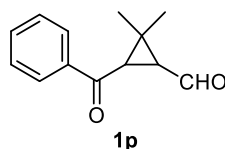

**Compound 1p** was synthesized as colorless oil.

**$^1H$  NMR (500 MHz,  $CDCl_3$ ):**  $\delta$  = 9.76 (d,  $J$  = 3.0 Hz, 1H), 7.95 (d,  $J$  = 7.5 Hz, 2H), 7.59 (t,  $J$  = 7.6 Hz, 1H), 7.49 (t,  $J$  = 8.0 Hz, 2H), 3.38 (d,  $J$  = 5.6 Hz, 1H), 2.91 – 2.89 (m, 1H), 1.47 (s, 3H), 1.22 (s, 3H) ppm

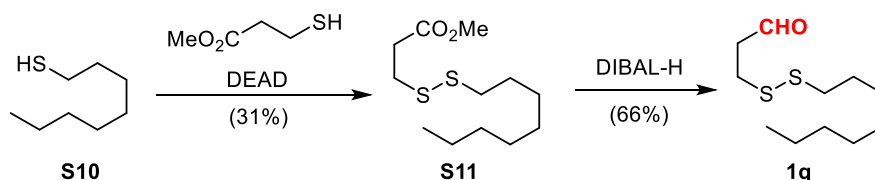

The procedure for prepare **1q** was take from the reported procedure.<sup>[5]</sup>

To a stirred solution of methyl 3-mercaptopropionate (0.3 mL, 2.71 mmol) in dry  $CH_2Cl_2$  (10 mL) at 0 °C was added DEAD (0.86 mL, 5.42 mmol), after stirred for 1.5 h, 1-mercaptooctane (0.56 mL, 3.26 mmol) was added to the reaction mixture and stirred for 12 h at r.t. Quench the reaction with sat.aq.  $NaHCO_3$  (10 mL) and then extract with EtOAc (2 × 20 mL). The combined organic layers were washed with brine (15 mL) and dried over anhydrous  $Na_2SO_4$ . Concentrated and flash chromatography (hexanes: EtOAc = 100: 1) to afford product (220 mg, 0.84 mmol, 31%) as a colorless oil.

To a solution of above **S11** (120 mg, 0.45 mmol) in dry  $t$ -BuOMe (8 mL) at – 78 °C was added DIBAL-H (0.90 mL, 0.90 mmol, 1.0 mmol/mL solution in Hexane). After stirred at – 78 °C for 2 h, the reaction mixture was quenched by MeOH (3 mL), then  $Et_2O$  (20 mL) and saturated solution of Rochelle salt (15 mL) was added, stirred until the two layers are clear (30 min). Then extract with EtOAc (2 × 20 mL), the combined organic layers were washed with brine and dried over anhydrous  $Na_2SO_4$ . Flash chromatography (hexanes: EtOAc = 60: 1)

to afford product **1q** (70 mg, 0.30 mmol, 66%) as a yellowish oil. Compound **1q** was used intermediately after characterized by proton NMR.

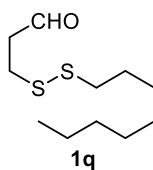

**<sup>1</sup>H NMR (500 MHz, CDCl<sub>3</sub>):**  $\delta$  = 9.82 (s, 1H), 2.95 – 2.92 (m, 2H), 2.91 – 2.88 (m, 2H), 2.69 – 2.65 (m, 2H), 1.69 – 1.63 (m, 2H), 1.39 – 1.36 (m, 2H), 1.31 – 1.25 (m, 8H), 0.88 (t,  $J$  = 7.3 Hz, 3H) ppm

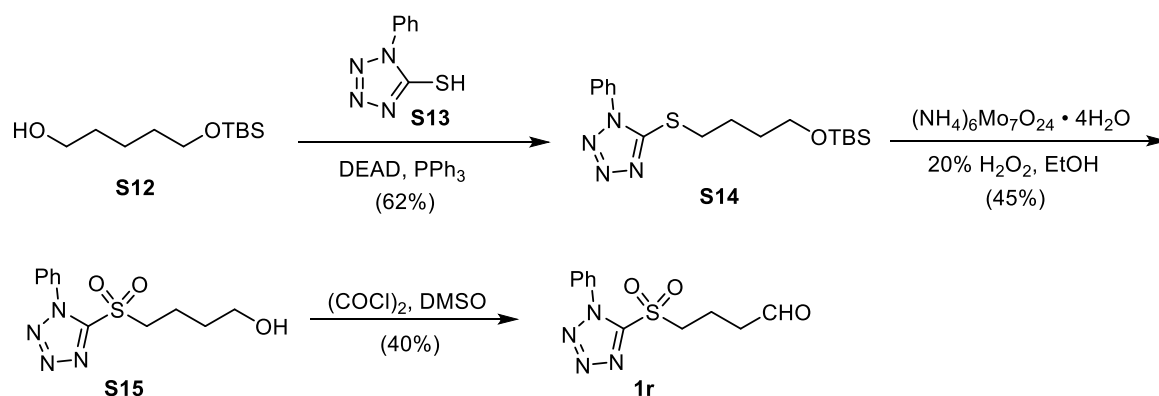

To a stirred solution of PPh<sub>3</sub> (660 mg, 2.5 mmol), DEAD (0.47 mL, 3.0 mmol) and **12** (450 mg, 2.5 mmol) in dry THF (20 mL) at 0 °C was added a solution of **S13** (410 mg, 2.0 mmol) in dry THF (5 mL), then the reaction mixture stirred at r.t for 8 h. Quench the reaction with sat.aq.NH<sub>4</sub>Cl (5 mL) and H<sub>2</sub>O (5 mL), then extracted with EtOAc (2 × 15 mL). The combined organic layers were washed with brine and dried over anhydrous Na<sub>2</sub>SO<sub>4</sub>. Concentrated and flash chromatography (hexanes: EtOAc = 30: 1) to afford product **S14** (450 mg, 1.24 mmol, 62%) as a yellow oil.

To a stirred solution of the above product **S14** (220 mg, 0.55 mmol) in EtOH (10 mL) at 0 °C was added Ammonium molybdate tetrahydrate (0.12 g, 0.10 mmol) and H<sub>2</sub>O<sub>2</sub> (1.75 mL, 11.0 mmol, 20% W/W solution in H<sub>2</sub>O), then after stirred for 10 min at 0 °C, the reaction mixture stirred at r.t for 24 h. Quench the reaction with aq. sat. NaHCO<sub>3</sub> (5 mL), then extracted with EtOAc (2 × 15 mL). The combined organic layers were washed with brine and dried over anhydrous Na<sub>2</sub>SO<sub>4</sub>. Concentrated and flash chromatography (hexanes: EtOAc = 2:1) to afford product **S15** (70 mg, 0.25 mmol, 45%) as a colorless oil.

To a stirred solution of  $(\text{COCl})_2$  (0.53 mL, 1.06 mmol, 2.0 M solution in  $\text{CH}_2\text{Cl}_2$ ) in dry  $\text{CH}_2\text{Cl}_2$  (5 mL) at  $-78^\circ\text{C}$  was added DMSO (0.15 mL, 2.12 mmol). Then the resulting solution stirred at  $-78^\circ\text{C}$  for 30 min. A solution of **S15** (150 mg, 0.53 mmol) in  $\text{CH}_2\text{Cl}_2$  (3 mL) was added to the reaction mixture at  $-78^\circ\text{C}$  and stirred for 1 h. Then  $\text{NEt}_3$  (0.59 mL, 4.24 mmol) was added to the reaction mixture and stirred at r.t for 1 h. Then reaction was quenched by addition of  $\text{H}_2\text{O}$  (3 mL) and followed by extraction with  $\text{Et}_2\text{O}$  ( $2 \times 10$  mL). The combined organic layers were washed with brine and dried over anhydrous  $\text{Na}_2\text{SO}_4$ . After filtration and concentration in vacuo, the crude product was purified by flash column chromatography (hexanes:  $\text{EtOAc} = 3:1$ ) on silica to afforded **1r** (60 mg, 0.21 mmol, 40%) as a colorless oil.

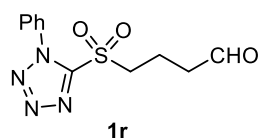

The analytical data of **1r** was in accordance to the reported one. <sup>[6]</sup>

**$^1\text{H}$  NMR (500 MHz,  $\text{CDCl}_3$ ):**  $\delta = 9.79$  (s, 1H), 7.70 – 7.68 (m, 2H), 7.64 – 7.59 (m, 3H), 3.83 – 3.80 (m, 2H), 2.78 (t,  $J = 6.9$  Hz, 2H), 2.32 – 2.26 (m, 2H) ppm

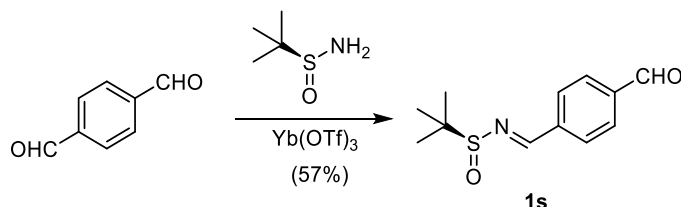

Compound **1s** was prepared through the reported procedure. <sup>[7]</sup>

To a stirred solution of terephthalaldehyde (295 mg, 2.2 mmol), R-(+)-*tert*-butylsulfinamide (242 mg, 2.0 mmol) in dry THF (10 mL) at r.t was added  $\text{Yb}(\text{OTf})_3$  (186 mg, 0.3 mmol), then the reaction mixture stirred at r.t for 24 h. Quench the reaction with  $\text{H}_2\text{O}$  (3 mL) and with  $\text{EtOAc}$  ( $2 \times 15$  mL). The combined organic layers were washed with brine and dried over anhydrous  $\text{Na}_2\text{SO}_4$ . Concentrated and flash chromatography (hexanes:  $\text{EtOAc} = 12 : 1$ ) to afford product **1s** (270 mg, 1.14 mmol, 57%) as a yellow needle solid.

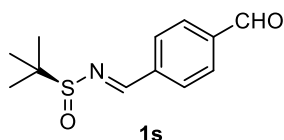

The analytical data of **1s** was in accordance to the reported one. <sup>[7]</sup>

**<sup>1</sup>H NMR (500 MHz, CDCl<sub>3</sub>):**  $\delta$  = 10.07 (s, 1H), 8.64 (s, 1H), 8.01 – 7.96 (m, 4H), 1.27 (s, 9H) ppm

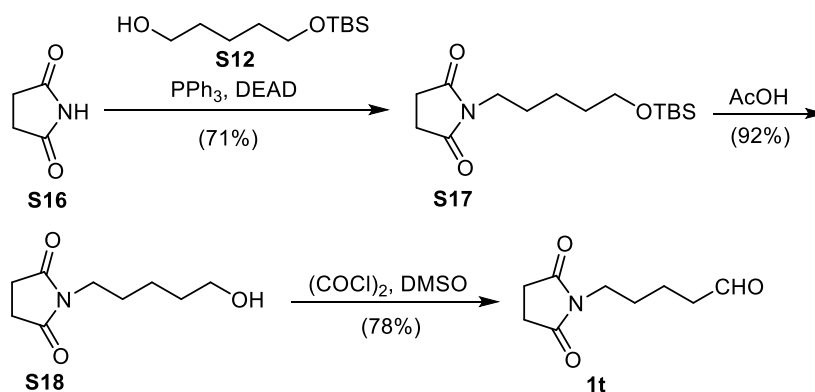

To a stirred solution of PPh<sub>3</sub> (2.1 g, 8.0 mmol), DEAD (1.57 mL, 10 mmol) in dry THF (10 mL) at 0 °C was added Succinimide **S16** (0.87 g, 4.0 mmol), after stirred for 10 min, **S12**<sup>8</sup> (0.79 g, 8.0 mmol) was added in one portion and stirred for 7 h. Quench the reaction with sat.aq. NH<sub>4</sub>Cl (10 mL) and H<sub>2</sub>O (20 mL) and then extract with EtOAc (2 × 20 mL). The combined organic layers were washed with brine and dried over anhydrous Na<sub>2</sub>SO<sub>4</sub>. Concentrated and flash chromatography (hexanes: EtOAc = 8: 1) to afford product **S17** (0.85 g, 2.84 mmol, 71%) as a yellow oil.

A solution of the above product **S17** (400 mg, 1.34 mmol) in AcOH/THF/H<sub>2</sub>O (6 mL: 2 mL:2 mL) was stirred at r.t for 8 h. Then the reaction mixture was concentrated and flash chromatography (CH<sub>2</sub>Cl<sub>2</sub>: MeOH = 70: 1) to afford product **S18** (228 mg, 1.23 mmol, 92%) as a colorless oil.

To a stirred solution of (COCl)<sub>2</sub> (1.10 mL, 2.2 mmol, 2.0 M solution in CH<sub>2</sub>Cl<sub>2</sub>) in dry CH<sub>2</sub>Cl<sub>2</sub> (10 mL) at – 78 °C was added DMSO (0.32 mL, 4.4 mmol). Then the resulting solution stirred at – 78 °C for 30 min. A solution of **S18** (200 mg, 1.1 mmol) in CH<sub>2</sub>Cl<sub>2</sub> (3 mL) was added to the reaction mixture at – 78 °C and stirred for 1 h. Then NEt<sub>3</sub> (1.23 mL, 8.8 mmol) was added to the reaction mixture and stirred for 30 min at r.t. The reaction was quenched by addition of sat. aq. NH<sub>4</sub>Cl (10 mL) and followed by extraction with Et<sub>2</sub>O (2×10 mL). The combined organic

layers were washed with brine and dried over anhydrous  $\text{Na}_2\text{SO}_4$ . After filtration and concentration in vacuo, the crude product was purified by flash column chromatography (hexanes: EtOAc = 2: 1) on silica to afforded **1t** (157 mg, 0.86 mmol, 78%) as a yellow oil.

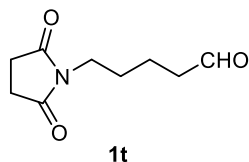

The analytical data of **1s** was in accordance to the reported one. <sup>[9]</sup>

**$^1\text{H}$  NMR (500 MHz,  $\text{CDCl}_3$ )**  $\delta$  = 9.75 (s, 1H), 3.55 – 3.49 (m, 2H), 2.70 (s, 4H), 2.50 – 2.44 (m, 2H), 1.64 – 1.58 (m, 4H) ppm

**Compound 1u** was synthesized following in the procedure of **1t** and was obtained as a pale yellow oil.

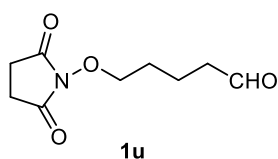

**$^1\text{H}$  NMR (500 MHz,  $\text{CDCl}_3$ ):**  $\delta$  = 9.76 (t,  $J$  = 1.5 Hz, 1H), 4.08 (t,  $J$  = 6.3 Hz, 2H), 2.69 (s, 4H), 2.52 (td,  $J$  = 7.4, 1.8 Hz, 2H), 1.85 – 1.79 (m, 2H), 1.77 – 1.72 (m, 2H) ppm

**$^{13}\text{C}$  NMR (125 MHz,  $\text{CDCl}_3$ ):**  $\delta$  = 202.1, 171.3, 76.7, 43.2, 27.4, 25.5, 18.3 ppm

**HRMS (ESI)** for  $\text{C}_9\text{H}_{14}\text{NO}_4$ ,  $[\text{M}+\text{H}]^+$ : calcd. 200.0917, found: 200.0918.

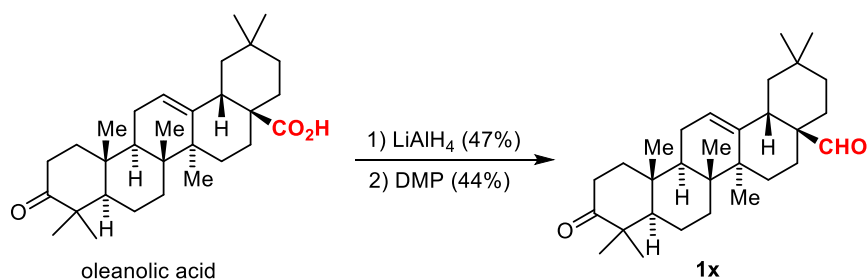

To a stirred solution of oleanolic acid (457 mg, 1.0 mmol) in dry THF (15 mL) at 0 °C was added  $\text{LiAlH}_4$  (2.0 mL, 2.0 mmol, 1.0 mmol/mL solution in THF), then the reaction mixture heated to reflux and stirred for 12 h. Quench the reaction with MeOH (2 mL) and then  $\text{Et}_2\text{O}$

(20 mL) and saturated solution of Rochelle salt (30 mL) was added, stirred until the two layers are clear (30 min). Then extract with EtOAc (2 × 30 mL), the combined organic layers were washed with brine and dried over anhydrous Na<sub>2</sub>SO<sub>4</sub>. Concentrated and flash chromatography (hexanes: EtOAc = 15: 1) to afford diol (210 mg, 0.47 mmol, 47%) as a white powder.

To a stirred solution of the above diol (150 mg, 0.34 mmol) in CH<sub>2</sub>Cl<sub>2</sub> (10 mL) at 0 °C was added Dess-Martin periodinane (433 mg, 1.02 mmol), after stirred for 2 h, the reaction was quench with brine (5 mL), then extracted with (2 × 10 mL), the combined organic layers were washed with 1N NaOH solution (10 mL) and dried over anhydrous Na<sub>2</sub>SO<sub>4</sub>. Concentrated and flash chromatography (hexanes: EtOAc = 30: 1) to afford **1x** (65 mg, 0.15 mmol, 44%) as a white powder.

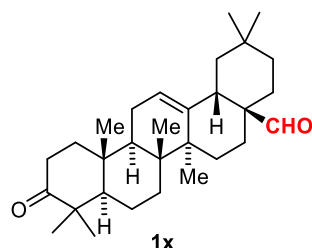

The analytical data of **1x** was in accordance to the reported one.<sup>[10]</sup>

**<sup>1</sup>H NMR (500 MHz, CDCl<sub>3</sub>):**  $\delta$  = 9.40 (s, 1H), 5.37 (t,  $J$  = 3.5 Hz, 1H), 2.65 (dd,  $J$  = 14.0, 4.5 Hz, 1H), 2.58 – 2.51 (m, 1H), 2.39 – 2.34 (m, 1H), 2.02 – 1.94 (m, 2H), 1.92 – 1.86 (m, 2H), 1.69 (t,  $J$  = 13.5 Hz, 2H), 1.50 – 1.46 (m, 4H), 1.44 – 1.37 (m, 2H), 1.35 – 1.34 (m, 1H), 1.31 – 1.25 (m, 5H), 1.22 – 1.21 (m, 1H), 1.20 – 1.18 (m, 1H), 1.15 (s, 3H), 1.09 (s, 3H), 1.04 (s, 6H), 0.92 (d,  $J$  = 2.7 Hz, 6H), 0.79 (s, 3H) ppm

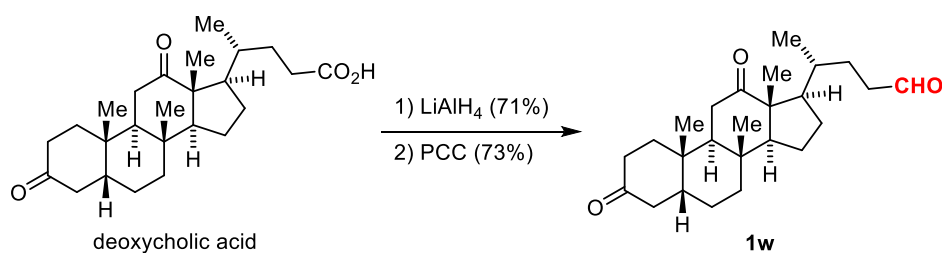

The procedure for prepare **1w** was take from the reported procedure.<sup>[11]</sup>

To a stirred solution of deoxycholic acid (393 mg, 1.0 mmol) in dry THF (15 mL) at 0 °C

was added  $\text{LiAlH}_4$  (2.0 mL, 2.0 mmol, 1.0 mmol/mL solution in THF), then remove the ice bath and the reaction mixture heated to reflux and stirred for 12 h. Quench the reaction with MeOH (0.5 mL), saturated Rochell's salt solution (20 mL) and  $\text{Et}_2\text{O}$  (20 mL) were added and stirred until the two layers are clear. Then extract with EtOAc (2×20 mL). The combined organic layers were washed with brine and then dried over anhydrous  $\text{Na}_2\text{SO}_4$ . Concentrated and flash chromatography (hexanes: EtOAc = 3:1) to afford the triol (270 mg, 0.71 mmol, 71%) as a white power.

The above triol (200 mg, 0.53 mmol) was dissolved in dry  $\text{CH}_2\text{Cl}_2$  (10 mL), then PCC (571 mg, 2.65 mmol) and NaOAc (217 mg, 2.65 mmol) was added to the solution and stirred for 1 h. Dilute the reaction mixture with  $\text{Et}_2\text{O}$  (10 mL) and filtered through a plug of silica gel. directly concentrated and flash chromatography (hexanes: EtOAc = 40 : 1) to afford **1w** (300 mg, 0.46 mmol, 86%) as a white powder.

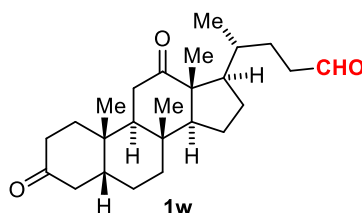

The analytical data of **1w** was in accordance to the reported one. <sup>[11]</sup>

**<sup>1</sup>H NMR (500 MHz,  $\text{CDCl}_3$ ):**  $\delta$  = 9.75 (s, 1H), 2.61 – 2.53 (m, 2H), 2.51 – 2.45 (m, 1H), 2.40 – 2.34 (m, 1H), 2.30 (dd,  $J$  = 14.6, 5.1 Hz, 1H), 2.15 (d,  $J$  = 14.4 Hz, 1H), 2.07 (dd,  $J$  = 13.0, 4.3 Hz, 1H), 2.03 – 1.98 (m, 2H), 1.95 – 1.86 (m, 6H), 1.82 – 1.78 (m, 1H), 1.76 – 1.73 (m, 1H), 1.58 (d,  $J$  = 13.9 Hz, 1H), 1.45 – 1.28 (m, 8H), 1.08 (s, 3H), 1.03 (s, 3H), 0.83 (d,  $J$  = 6.5 Hz, 3H) ppm

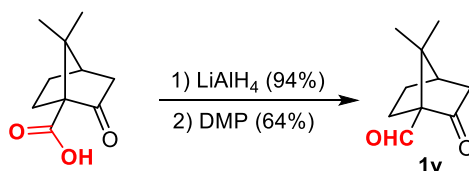

To a stirred solution of ketopinic acid (182 mg, 1 mmol) in dry THF (10 mL) at 0 °C was added  $\text{LiAlH}_4$  (2.0 mL, 2.0 mmol, 1.0 mmol/mL solution in THF), then the reaction mixture heated to reflux and stirred for 12 h. Quench the reaction with MeOH (2 mL) and then  $\text{Et}_2\text{O}$

(20 mL) and saturated solution of Rochelle salt (30 mL) was added, stirred until the two layers are clear (30 min). Then extract with EtOAc (2 × 30 mL), the combined organic layers were washed with brine and dried over anhydrous Na<sub>2</sub>SO<sub>4</sub>. Concentrated to afford diol (160 mg, 0.94 mmol, 94%) as a white powder without further purification.

To a stirred solution of the above diol (160 mg, 0.94 mmol) in CH<sub>2</sub>Cl<sub>2</sub> at 0 °C was added Dess-Martin periodinane (1.20 g, 2.82 mmol), after stirred for 2 h, the reaction was quenched with brine (5 mL), then extracted with (2 × 10 mL), the combined organic layers were washed with 1N NaOH solution and dried over anhydrous Na<sub>2</sub>SO<sub>4</sub>. Concentrated and flash chromatography (hexanes: EtOAc = 6:1) to afford **1v** (100 mg, 0.60 mmol, 64%) as a white powder.

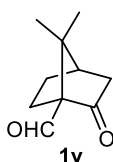

The analytical data of **1v** was in accordance to the reported one.<sup>[12]</sup>

<sup>1</sup>H NMR (500 MHz, CDCl<sub>3</sub>): δ = 9.94 (s, 1H), 2.59 (d, *J* = 18.0 Hz, 1H), 2.31 (t, *J* = 12.6 Hz, 1H), 2.16 (s, 1H), 2.08 (t, *J* = 12.7 Hz, 1H), 1.97 (d, *J* = 18.9 Hz, 1H), 1.69 – 1.64 (m, 1H), 1.46 (t, *J* = 10.6 Hz, 1H), 1.22 (s, 3H), 1.09 (s, 3H) ppm

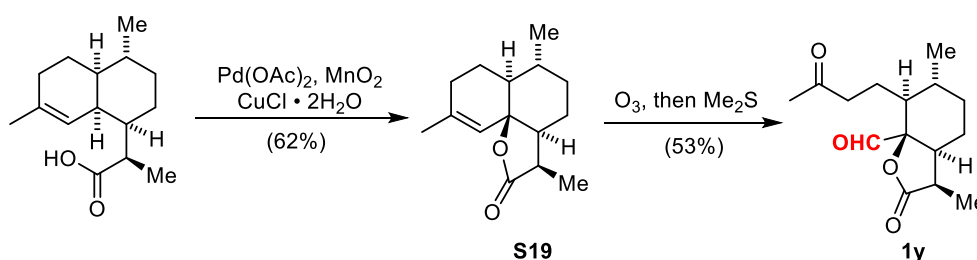

Compound **1y** was prepared through the reported procedure.<sup>[13]</sup>

Dihydroartemisinic acid (473 mg, 2.0 mmol) was dissolved in dry CH<sub>2</sub>Cl<sub>2</sub> (20 mL), then CuCl<sub>2</sub>·2H<sub>2</sub>O (426 mg, 2.5 mmol), Pd(OAc)<sub>2</sub> (112 mg, 0.5 mmol) and activated MnO<sub>2</sub> (261 mg, 3.0 mmol) were added to the solution and the reaction mixture heated to reflux and stirred for 30 h. Filtered through a plug of silica gel and washed the reaction residue with EtOAc (2×10 mL). Concentrated and flash chromatography (hexanes: EtOAc = 30: 1) to afford product **S19** (290 mg, 1.24 mmol, 62%) as a white solid.

O<sub>3</sub> was bubbled through a stirred solution of the above product **s19** (200 mg, 0.85 mmol) in CH<sub>2</sub>Cl<sub>2</sub> (10 mL) at – 78 °C until the reaction mixture color change into blue, an Ar balloon was bubbled to the solution followed by Me<sub>2</sub>S (0.31 mL, 4.25 mmol) was added, then stirred at r.t for 12 h. The reaction mixture was directly concentrated and flash chromatography (hexanes: EtOAc = 4: 1) to afford product **1y** (120 mg, 0.45 mmol, 53%) as a colorless oil.

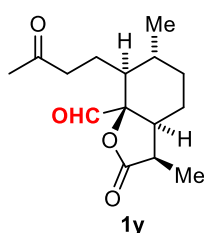

The analytical data of **1y** was in accordance to the reported one. <sup>[13]</sup>

**<sup>1</sup>H NMR (500 MHz, CDCl<sub>3</sub>):**  $\delta$  = 9.74 (s, 1H), 2.64 – 2.56 (m, 2H), 2.46 – 2.37 (m, 2H), 2.12 (s, 3H), 1.89 – 1.77 (m, 2H), 1.73 – 1.69 (m, 3H), 1.45 (s, 1H), 1.11 (d, *J* = 6.9 Hz, 5H), 0.99 (d, *J* = 6.4 Hz, 3H) ppm

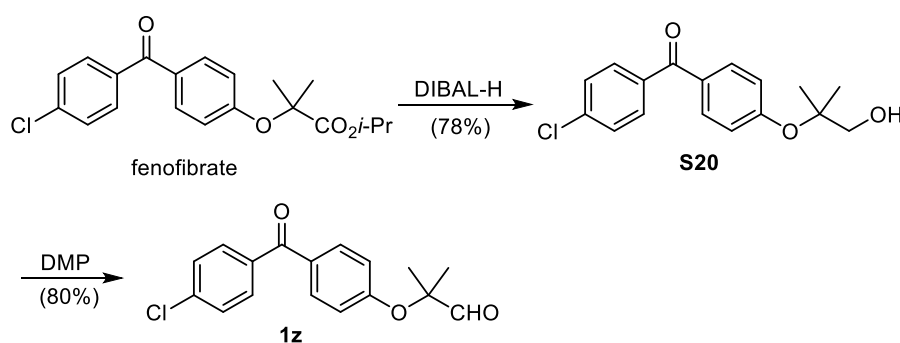

To a stirred solution of fenofibrate (360 mg, 1.0 mmol) in dry CH<sub>2</sub>Cl<sub>2</sub> (10 mL) at – 20 °C was added DIBAL-H (4.0 mL, 4.0 mmol, 1.0 M solution in hexane). Then after stirred at – 20 °C for 2 h, the reaction mixture was quenched by MeOH (3 mL), then Et<sub>2</sub>O (30 mL) and saturated solution of Rochelle salt (20 mL) was added, stirred until the two layers are clear (30 min). Then extract with EtOAc (2 × 20 mL), the combined organic layers were washed with brine and dried over anhydrous Na<sub>2</sub>SO<sub>4</sub>. Concentrated afford crude product **S20** which directly used for the next step.

To a stirred solution of the above crude diol **S20** in CH<sub>2</sub>Cl<sub>2</sub> (10 mL) at 0 °C was added

Dess-Martin periodinane (0.99 g, 2.34 mmol), after stirred for 2 h, the reaction was quenched with brine (5 mL), then extracted with (2 × 10 mL), the combined organic layers were washed with 1N NaOH solution and dried over anhydrous Na<sub>2</sub>SO<sub>4</sub>. Concentrated and flash chromatography (hexanes: EtOAc = 20: 1) to afford **1z** (190 mg, 0.63 mmol, 63% over two steps) as a white solid.

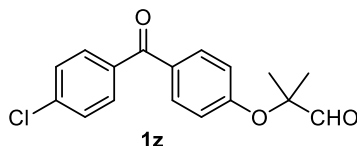

The analytical data of **1z** was in accordance to the reported one. <sup>[14]</sup>

**<sup>1</sup>H NMR (500 MHz, CDCl<sub>3</sub>):**  $\delta$  = 9.82 (s, 1H), 7.75 – 7.70 (m, 4H), 7.45 (d,  $J$  = 8.4 Hz, 2H), 6.89 (d,  $J$  = 8.5 Hz, 2H), 1.53 (s, 6H) ppm

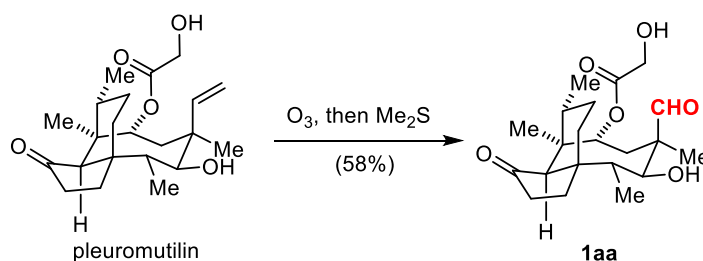

O<sub>3</sub> was bubbled through a stirred solution of pleuromutilin (378.4 mg, 1.0 mmol) in CH<sub>2</sub>Cl<sub>2</sub> (10 mL) at – 78 °C until the reaction mixture color change into blue, an Ar balloon was bubbled to the solution followed by Me<sub>2</sub>S (0.37 mL, 5.0 mmol) was added, then the reaction mixture stirred at r.t for 12 h. The reaction mixture was directly concentrated and flash chromatography (hexanes: EtOAc = 1: 1) to afford product **1aa** (220 mg, 0.58 mmol, 58%) as a white powder.

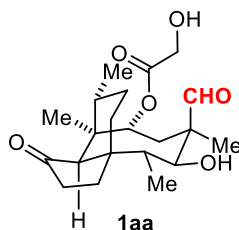

The analytical data of **1aa** was in accordance to the reported one. <sup>[15]</sup>

**<sup>1</sup>H-NMR (500 MHz, CDCl<sub>3</sub>):**  $\delta$  = 9.54 (d,  $J$  = 3.1 Hz, 1H), 5.34 (d,  $J$  = 8.6 Hz, 1H), 4.14 – 4.03 (m, 2H), 3.37 (dd,  $J$  = 6.6, 2.6 Hz, 1H), 2.55 (s, 2H), 2.37 – 2.31 (m, 1H), 2.26 – 2.15 (m, 2H), 2.09 –

2.03 (m, 1H), 1.95 (d,  $J = 2.2$  Hz, 1H), 1.80–1.72 (m, 2H), 1.68 – 1.61 (m, 2H), 1.51 – 1.46 (m, 1H), 1.44 (s, 3H), 1.39 – 1.34 (m, 2H), 1.27 (s, 3H), 1.16 – 1.11 (m, 1H), 1.09 (d,  $J = 7.2$  Hz, 3H), 0.68 (d,  $J = 7.4$  Hz, 3H) ppm

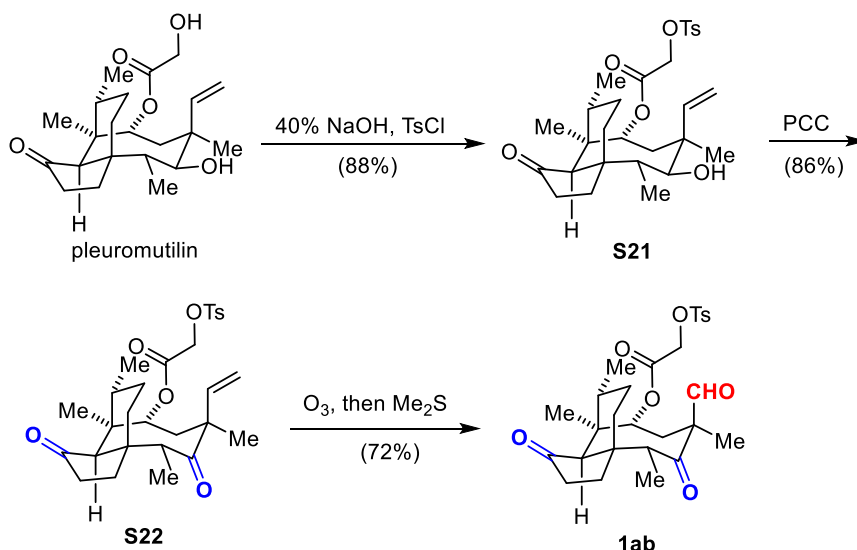

Compound **S21** was prepared through the reported procedure.<sup>[16]</sup>

40% sodium hydroxide solution (0.5 mL, 5.0 mmol) was added dropwise to a mixture of pleuromutilin (757.0 mg, 2.0 mmol) and *p*-toluenesulfonyl chloride (*p*-TsCl) (457.6 mg, 2.4 mmol) in THF (15 mL) and water (3 mL). The mixture was stirred vigorously under reflux for 1 h, then diluted with water (20 mL) and stirred under an ice bath for 15 min, followed by washing with water (20 mL) and cold THF (20 mL). Filtration afforded **S21** as white solid (937.5 mg, 1.76 mmol, 88%). It was used in the next step without further purification.

The above product **S21** (350 mg, 0.66 mmol) was dissolved in dry CH<sub>2</sub>Cl<sub>2</sub> (10 mL), then PCC (356 mg, 1.65 mmol) and NaOAc (217 mg, 2.65 mmol) was added to the solution and stirred for 1 h. Dilute the reaction mixture with Et<sub>2</sub>O (10 mL) and filtered through a plug of silica gel. Then concentrated and flash chromatography (hexanes: EtOAc = 10:1) to afford product **s22** (300 mg, 0.57 mmol, 86%) as a white powder.

O<sub>3</sub> was bubbled through a stirred solution of the above product **s22** (200 mg, 0.38 mmol) in CH<sub>2</sub>Cl<sub>2</sub> (10 mL) at – 78 °C until the reaction mixture color change into blue, an Ar balloon was bubbled to the solution followed by Me<sub>2</sub>S (0.14 mL, 1.9 mmol) was added, then stirred at r.t for 12 h. The reaction mixture was directly concentrated and flash chromatography (hexanes : EtOAc = 5:1) to afford product **1ab** (145 mg, 0.27 mmol, 72%) as a white powder.

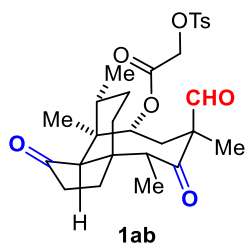

**<sup>1</sup>H NMR (500 MHz, CDCl<sub>3</sub>):**  $\delta$  = 9.54 (s, 1H), 7.80 (d,  $J$  = 7.3 Hz, 2H), 7.35 (d,  $J$  = 7.3 Hz, 2H), 5.64 (d,  $J$  = 7.4 Hz, 1H), 4.53 (s, 2H), 3.10 (s, 1H), 2.43 (s, 3H), 2.19 – 2.10 (m, 3H), 2.05 – 2.00 (m, 1H), 1.86 (d,  $J$  = 16.0 Hz, 1H), 1.63 – 1.55 (m, 3H), 1.47 – 1.40 (m, 4H), 1.39 – 1.30 (m, 2H), 1.14 (s, 3H), 1.11 – 1.04 (m, 4H), 0.65 (d,  $J$  = 4.2 Hz, 3H) ppm

**<sup>13</sup>C-NMR (125 MHz, CDCl<sub>3</sub>):**  $\delta$  = 215.8, 212.2, 202.6, 165.7, 145.6, 132.5, 130.0, 128.1, 71.8, 64.9, 63.3, 58.7, 47.8, 45.3, 41.9, 38.4, 36.9, 34.5, 29.7, 26.7, 24.6, 21.7, 18.8, 17.2, 14.8, 12.4 ppm

**HRMS(ESI)** for C<sub>28</sub>H<sub>36</sub>O<sub>8</sub>SNa [M+Na]<sup>+</sup>: calcd. 555.2028, found: 555.2016.

### 3. Data for reduction product:

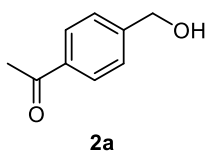

**Compound 2a**, pale yellow oil.

Yield: 95%. Reaction time: 5 min.

The analytical data of **2a** was in accordance to the reported one. <sup>[17]</sup>

**<sup>1</sup>H NMR (500 MHz, CDCl<sub>3</sub>) :**  $\delta$  = 7.96 (d,  $J$  = 8.2 Hz, 2H), 7.46 (d,  $J$  = 8.0 Hz, 2H), 4.78 (s, 2H), 2.61 (s, 3H), 1.82 (s, 1H) ppm

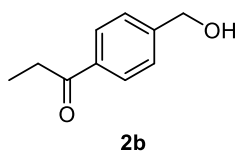

**Compound 2b**, white powder solid.

Yield: 76%. Reaction time: 12 min at 0 °C.

The analytical data of **2b** was in accordance to the reported one. <sup>[18]</sup>

**<sup>1</sup>H NMR (500 MHz, CDCl<sub>3</sub>):**  $\delta$  = 7.96 (d,  $J$  = 8.2 Hz, 2H), 7.45 (d,  $J$  = 8.2 Hz, 2H), 4.78 (s, 2H), 3.01 (q,  $J$  = 7.2 Hz, 2H), 1.79 (s, 1H), 1.23 (t,  $J$  = 7.0 Hz, 3H) ppm

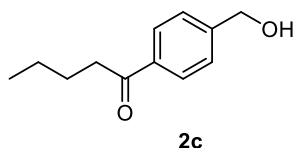

**Compound 2c**, white powder solid.

Yield: 92%. Reaction time: 15 min at 0 °C.

The analytical data of **2c** was in accordance to the reported one. <sup>[19]</sup>

**<sup>1</sup>H NMR (500 MHz, CDCl<sub>3</sub>):**  $\delta$  = 7.95 (d,  $J$  = 8.2 Hz, 2H), 7.45 (d,  $J$  = 8.1 Hz, 2H), 4.77 (s, 2H), 2.96 (t,  $J$  = 7.5 Hz, 2H), 1.98 (s, 1H), 1.75–1.68 (m, 2H), 1.45–1.37 (m, 2H), 0.95 (t,  $J$  = 7.4 Hz, 3H) ppm

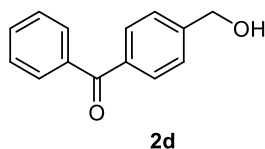

**Compound 2d**, white needle crystal.

Yield: 86%. Reaction time: 3 min at 0 °C.

The analytical data of **2d** was in accordance to the reported one. <sup>[20]</sup>

**<sup>1</sup>H NMR (500 MHz, CDCl<sub>3</sub>):**  $\delta$  = 7.83 – 7.77 (m, 4H), 7.62 – 7.56 (m, 1H), 7.51 – 7.45 (m, 4H), 4.81 (s, 2H), 1.82 (s, 1H) ppm

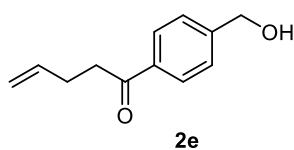

**Compound 2e**, yellow oil.

Yield: 94%. Reaction time: 25 min at 0 °C.

**<sup>1</sup>H NMR (500 MHz, CDCl<sub>3</sub>):**  $\delta$  = 7.93 (d,  $J$  = 8.1 Hz, 2H), 7.43 (d,  $J$  = 8.3 Hz, 2H), 5.93 – 5.85 (m, 1H), 5.07 (d,  $J$  = 17.1 Hz, 1H), 5.00 (d,  $J$  = 10.2 Hz, 1H), 4.75 (s, 2H), 3.05 (t,  $J$  = 7.6 Hz, 2H), 2.50–2.45 (m, 2H), 2.27 (s, 1H) ppm

**<sup>13</sup>C NMR (125 MHz, CDCl<sub>3</sub>):**  $\delta$  = 199.4, 146.3, 137.3, 136.1, 128.3, 126.7, 115.4, 64.6, 37.8, 28.2 ppm

**HRMS (APCI)** for C<sub>12</sub>H<sub>13</sub>O<sub>2</sub> [M-H]<sup>−</sup> calcd. 189.0921, found: 189.0921.

When **1f** was submit to the reaction condition, only **2b** was obtained.

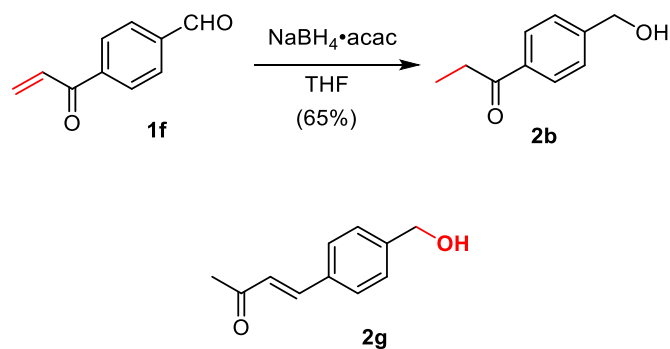

**Compound 2g**, white powder solid.

Yield: 85%. Reaction time: 20 min at 0 °C.

The analytical data of **2g** was in accordance to the reported one. <sup>[21]</sup>

**<sup>1</sup>H NMR (500 MHz, CDCl<sub>3</sub>):**  $\delta$  = 7.55 – 7.49 (m, 3H), 7.41(d,  $J$  = 8.2 Hz, 2H), 6.71(d,  $J$  = 16.3 Hz, 1H), 4.74 (s, 2H), 2.39 (s, 3H) ppm

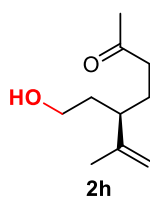

**Compound 2h**, colorless oil.

Yield: 73%. Reaction time: 15 min at 0 °C.

The analytical data of **2h** was in accordance to the reported one. <sup>[22]</sup>

**<sup>1</sup>H NMR (500 MHz, CDCl<sub>3</sub>)**  $\delta$  = 4.80 – 4.78 (m, 1H), 4.73 – 4.72 (m, 1H), 3.64 – 3.55 (m, 2H), 2.36 (t,  $J$  = 7.5 Hz, 2H), 2.22 – 2.15 (m, 1H), 2.11 (s, 3H), 1.71 – 1.63 (m, 2H), 1.62 – 1.61 (m, 1H), 1.60 (s, 3H), 1.57 – 1.52 (m, 1H) ppm

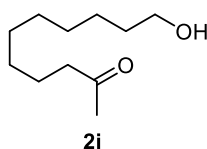

**Compound 2i**, white flaky crystal.

Yield: 87%. Reaction time: 15 min at 0 °C.

The analytical data of **2i** was in accordance to the reported one. <sup>[23]</sup>

**<sup>1</sup>H NMR (500 MHz, CDCl<sub>3</sub>)**:  $\delta$  = 3.65 – 3.62 (m, 2H), 2.42 – 2.40 (m, 2H), 2.13 (s, 3H), 1.60 – 1.51 (m, 4H), 1.47 (s, 1H), 1.33 – 1.24 (m, 10H) ppm

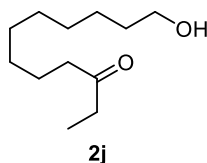

**Compound 2j**, white flaky crystal.

Yield: 80%. Reaction time: 20 min at 0 °C.

The analytical data of **2j** was in accordance to the reported one. <sup>[24]</sup>

**<sup>1</sup>H NMR (500 MHz, CDCl<sub>3</sub>)**:  $\delta$  = 3.64 – 3.62 (m, 2H), 2.44 – 2.37 (m, 4H), 1.59 – 1.51 (m, 4H), 1.33 – 1.22 (m, 10H), 1.05 (t,  $J$  = 7.2 Hz, 3H) ppm

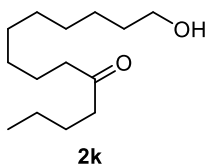

**Compound 2k**, white flaky crystal.

Yield: 81%. Reaction time: 30 min at 0 °C.

**<sup>1</sup>H NMR (500 MHz, CDCl<sub>3</sub>):**  $\delta$  = 3.65 – 3.63 (m, 2H), 2.40 – 2.37 (m, 4H), 1.60 – 1.50 (m, 6H), 1.33 – 1.24 (m, 12H), 0.90 (t,  $J$  = 7.6 Hz, 3H) ppm

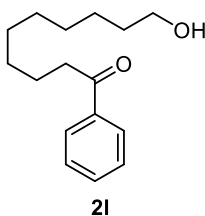

**Compound 2l**, white flaky crystal.

Yield: 83%. Reaction time: 20 min at 0 °C.

**<sup>1</sup>H NMR (500 MHz, CDCl<sub>3</sub>):**  $\delta$  = 7.96 (d,  $J$  = 7.4 Hz, 2H), 7.55 (t,  $J$  = 7.5 Hz, 1H), 7.46 (t,  $J$  = 7.6 Hz, 2H), 3.64 (t,  $J$  = 6.6 Hz, 2H), 2.96 (t,  $J$  = 7.4 Hz, 2H), 1.76 – 1.71 (m, 2H), 1.59 – 1.54 (m, 2H), 1.40 – 1.28 (m, 10H) ppm

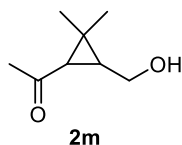

**Compound 2m**, colorless oil.

Yield: 67%. Reaction time: 20 min at 0 °C.

**<sup>1</sup>H NMR (500 MHz, CDCl<sub>3</sub>):**  $\delta$  = 3.73 – 3.69 (m, 1H), 3.64 – 3.60 (m, 1H), 2.23 (s, 3H), 1.86 (q,  $J$  = 6.8 Hz, 1H), 1.77 (d,  $J$  = 5.4 Hz, 1H), 1.27 (s, 3H), 1.14 (s, 3H) ppm

**<sup>13</sup>C NMR (125 MHz, CDCl<sub>3</sub>):**  $\delta$  = 205.7, 62.0, 40.2, 35.6, 3 2.2, 24.3, 21.4, 20.1 ppm

**HRMS (APCI)** for C<sub>8</sub>H<sub>13</sub>O<sub>2</sub> [M–H]<sup>–</sup>: calcd. 141.0921, found: 141.0923.

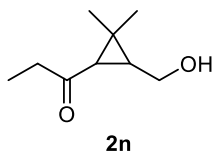

**Compound 2n.** colorless oil.

Yield: 75%. Reaction time: 15 min at 0 °C.

**<sup>1</sup>H NMR (500 MHz, CDCl<sub>3</sub>):**  $\delta$  = 3.72 – 3.68 (m, 1H), 3.64 – 3.60 (m, 1H), 2.57 – 2.45 (m, 2H), 1.86 (q,  $J$  = 6.9 Hz, 1H), 1.74 (d,  $J$  = 5.4 Hz, 1H), 1.26 (s, 3H), 1.12 (s, 3H), 1.06 (t,  $J$  = 7.4 Hz, 3H) ppm

**<sup>13</sup>C NMR (125 MHz, CDCl<sub>3</sub>):**  $\delta$  = 208.5, 62.0, 39.3, 38.1, 35.1, 30.3, 21.4, 20.2, 8.0 ppm

**HRMS (APCI)** for C<sub>9</sub>H<sub>17</sub>O<sub>2</sub> [M+H]<sup>+</sup>: calcd. 157.1223, found: 157.1221.

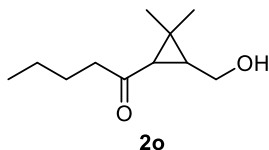

**Compound 2o.** colorless oil.

Yield: 74%. Reaction time: 70 min at r.t.

**<sup>1</sup>H NMR (500 MHz, CDCl<sub>3</sub>):**  $\delta$  = 3.70 – 3.66 (m, 1H), 3.62 – 3.58 (m, 1H), 2.47 (t,  $J$  = 7.6 Hz, 2H), 1.86 – 1.82 (m, 1H), 1.73 (d,  $J$  = 4.8 Hz, 2H), 1.60 – 1.49 (m, 2H), 1.34 – 1.28 (m, 2H), 1.25 (s, 3H), 1.10 (s, 3H), 0.89 (t,  $J$  = 7.0 Hz, 3H) ppm

**<sup>13</sup>C NMR (125 MHz, CDCl<sub>3</sub>):**  $\delta$  = 208.4, 61.9, 44.8, 39.6, 35.2, 30.6, 26.2, 22.4, 21.4, 20.2, 13.9 ppm

**HRMS (APCI)** for C<sub>11</sub>H<sub>19</sub>O<sub>2</sub> [M–H]<sup>–</sup>: calcd. 183.1390, found: 183.1393.

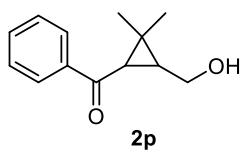

**Compound 2p.** colorless oil.

Yield: 95%. Reaction time: 80 min at 0 °C.

**<sup>1</sup>H NMR (500 MHz, CDCl<sub>3</sub>):**  $\delta$  = 7.91 (d,  $J$  = 7.4 Hz, 2H), 7.54 (t,  $J$  = 7.6 Hz, 1H), 7.46 (t,  $J$  = 7.6 Hz, 2H), 3.82 – 3.78 (m, 1H), 3.73 – 3.69 (m, 1H), 2.38 (d,  $J$  = 5.6 Hz, 1H), 2.12 (q,  $J$  = 6.8 Hz, 1H), 1.79 (s, 1H), 1.42 (s, 3H), 1.13 (s, 3H) ppm

**<sup>13</sup>C NMR (125 MHz, CDCl<sub>3</sub>):**  $\delta$  = 197.9, 138.7, 132.7, 128.5, 128.0, 62.0, 37.4, 34.3, 31.0, 21.2, 20.4 ppm

**HRMS (APCI)** for C<sub>13</sub>H<sub>15</sub>O<sub>2</sub> [M–H]<sup>–</sup>: calcd. 203.1078, found: 203.1074.

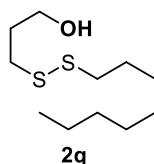

**Compound 2q.** Colorless oil.

Yield: 81%. Reaction time: 8 min at 0 °C.

**<sup>1</sup>H NMR (500 MHz, CDCl<sub>3</sub>):**  $\delta$  = 3.76 (td,  $J$  = 6.2, 2.2 Hz, 2H), 2.83 – 2.78 (m, 2H), 2.68 (q,  $J$  = 7.2 Hz, 2H), 1.98 – 1.92 (m, 2H), 1.72 (s, 1H), 1.69 – 1.63 (m, 2H), 1.40 – 1.34 (m, 2H), 1.31 – 1.24 (m, 8H), 0.87 (t,  $J$  = 7.1 Hz, 3H) ppm

**<sup>13</sup>C NMR (125 MHz, CDCl<sub>3</sub>):**  $\delta$  = 61.1, 61.0, 39.2, 39.1, 35.2, 35.1, 31.8, 29.2, 28.6, 22.7, 14.1 ppm

**HRMS (ESI)** for C<sub>11</sub>H<sub>25</sub>OS<sub>2</sub> [M+H]<sup>+</sup>: calcd . 237.1341, found: 237.1346.

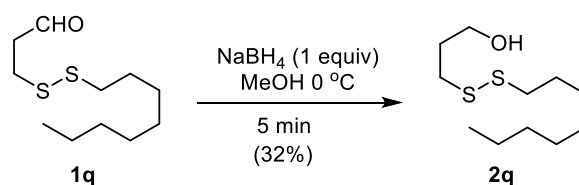

When compound **1q** was submitted to the control condition (NaBH<sub>4</sub> (1 equiv) in MeOH at 0°C), the product **2q** was obtained with 32% yield.

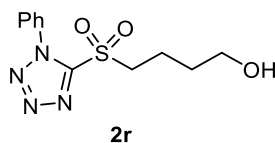

**Compound 2r.** Pale yellow oil.

Yield: 84%. Reaction time: 10 min at 0 °C.

The analytical data of **2r** was in accordance to the reported one. <sup>[25]</sup>

**<sup>1</sup>H NMR (500 MHz, CDCl<sub>3</sub>):**  $\delta$  = 7.69 – 7.67 (m, 2H), 7.64 – 7.57 (m, 3H), 3.81 (t,  $J$  = 8.2 Hz, 2H), 3.71 (t,  $J$  = 6.3 Hz, 2H), 2.11 – 2.05 (m, 2H), 1.82 (s, 1H), 1.78 – 1.73 (m, 2H) ppm

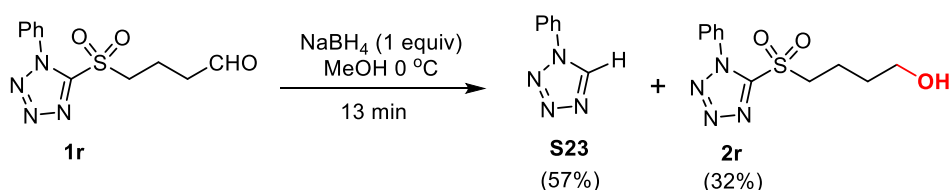

When compound **1r** was submitted to the control condition (NaBH<sub>4</sub> (1 equiv) in MeOH at 0°C), the product **2r** was obtained with 32% yield, compound **S23** was also obtained with 57% yield.

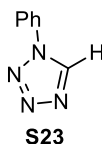

**Compound S23.** Colorless oil

The analytical data of **S23** was in accordance to the reported one. <sup>[26]</sup>

**<sup>1</sup>H NMR (500 MHz, CDCl<sub>3</sub>):**  $\delta$  = 8.99 (s, 1H), 7.72 (d,  $J$  = 7.8 Hz, 2H), 7.60 (t,  $J$  = 7.9 Hz, 2H), 7.55 (t,  $J$  = 7.5 Hz, 1H) ppm

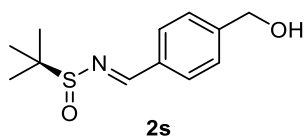

**Compound 2s.** White needle solid.

Yield: 97%. Reaction time: 25 min at 0 °C.

**<sup>1</sup>H NMR (500 MHz, CDCl<sub>3</sub>):**  $\delta$  = 8.43 (s, 1H), 7.77 (d,  $J$  = 8.2 Hz, 2H), 7.45 (d,  $J$  = 8.1 Hz, 2H), 4.74 (s, 2H), 2.80 (s, 1H), 1.23 (s, 9H) ppm

**<sup>13</sup>C NMR (125 MHz, CDCl<sub>3</sub>):**  $\delta$  = 162.4, 146.0, 133.2, 129.6, 127.1, 64.6, 57.9, 22.6 ppm

**HRMS (ESI)** for C<sub>12</sub>H<sub>17</sub>NO<sub>2</sub>Na [M+Na]<sup>+</sup>: calcd. 262.0877, found: 262.0889.

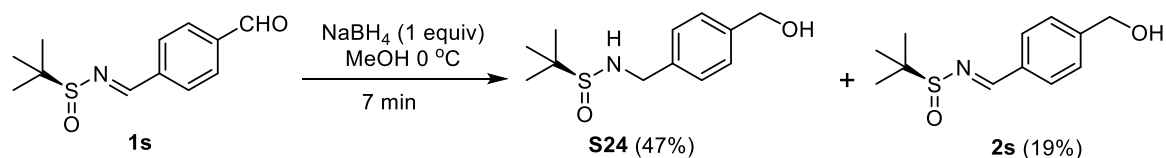

When compound **1s** was submitted to the control condition (NaBH<sub>4</sub> (1 equiv) in MeOH at 0 °C), the product **2s** was obtained with 19% yield, the fully reduced compound **S24** was obtained with 47% yield.

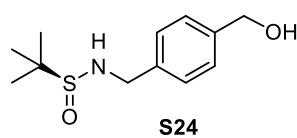

**Compound S24.** Colorless oil.

**<sup>1</sup>H NMR (500 MHz, CDCl<sub>3</sub>):**  $\delta$  = 7.34 – 7.29 (m, 4H), 4.66 (s, 2H), 4.29 (dd,  $J$  = 13.9, 4.1 Hz, 1H), 4.20 (dd,  $J$  = 13.8, 7.5 Hz, 1H), 3.50 – 3.47 (m, 1H), 2.40 (s, 1H), 1.22 (s, 9H) ppm

**<sup>13</sup>C NMR (125 MHz, CDCl<sub>3</sub>):**  $\delta$  = 140.7, 137.7, 128.3, 127.3, 64.8, 56.0, 49.2, 22.7 ppm

**HRMS (ESI)** for C<sub>12</sub>H<sub>19</sub>NO<sub>2</sub>Na [M+Na]<sup>+</sup>: calcd. 264.1034, found: 264.1031.

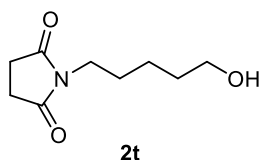

**Compound 2t.** Colorless oil.

Yield: 83%. Reaction time: 25 min at 0 °C.

The analytical data of **2t** was in accordance to the reported one. <sup>[27]</sup>

**<sup>1</sup>H NMR (500 MHz, CDCl<sub>3</sub>)**  $\delta$  = 3.61 (t,  $J$  = 6.6 Hz, 2H), 3.50 (t,  $J$  = 7.4 Hz, 2H), 2.68 (s, 4H), 1.77

(s, 1H), 1.60 – 1.56 (m, 4H), 1.38 – 1.32 (m, 2H) ppm

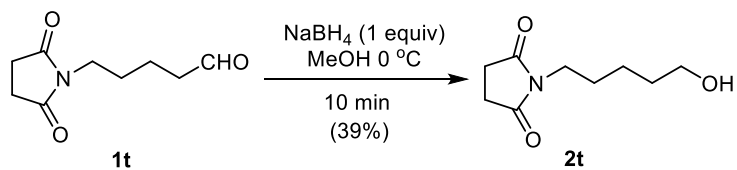

When compound **1t** was submitted to the control condition ( $\text{NaBH}_4$  (1 equiv) in MeOH at  $0^\circ\text{C}$ ), the product **2t** was obtained only with 39% yield.

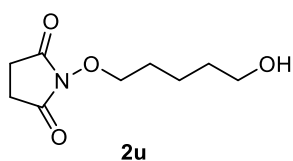

**Compound 2u.** Pale yellow oil.

Yield: 91%. Reaction time: 13 min at  $0^\circ\text{C}$ .

$^1\text{H}$  NMR (500 MHz,  $\text{CDCl}_3$ )  $\delta$  = 4.08 (t,  $J$  = 6.3 Hz, 2H), 3.64 (t,  $J$  = 6.2 Hz, 2H), 2.69 (s, 4H), 1.87 (s, 1H), 1.77 – 1.71 (m, 2H), 1.62–1.53 (m, 4H) ppm

$^{13}\text{C}$  NMR (125 MHz,  $\text{CDCl}_3$ )  $\delta$  = 171.4, 77.3, 62.5, 32.2, 27.8, 25.5, 21.8 ppm

HRMS(ESI) for  $\text{C}_9\text{H}_{15}\text{NO}_4\text{Na}$   $[\text{M}+\text{Na}]^+$ : calcd 224.0899, found: 224.0894.

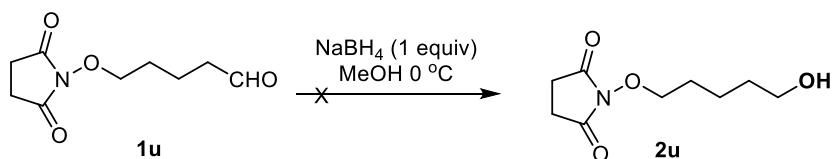

When compound **1u** was submitted to the control condition ( $\text{NaBH}_4$  (1 equiv) in MeOH at  $0^\circ\text{C}$ ), the product **2u** was not obtained.

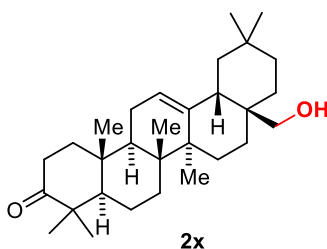

**Compound 2x.** White flaky crystal.

Yield: 83%. Reaction time: 90 min at 0 °C.

The analytical data of **2x** was in accordance to the reported one. <sup>[28]</sup>

**<sup>1</sup>H NMR (500 MHz, CDCl<sub>3</sub>):**  $\delta$  = 5.22 (t,  $J$  = 3.5 Hz, 1H), 3.56 (d,  $J$  = 11.0 Hz, 1H), 3.23 (d,  $J$  = 11.2 Hz, 1H), 2.58 – 2.51 (m, 1H), 2.40 – 2.34 (m, 1H), 2.02 – 1.98 (m, 1H), 1.97 – 1.93 (m, 1H), 1.90 – 1.85 (m, 3H), 1.76 – 1.71 (m, 2H), 1.66 – 1.63 (m, 1H), 1.57 – 1.49 (m, 4H), 1.44 – 1.36 (m, 3H), 1.34 – 1.30 (m, 3H), 1.28 – 1.20 (m, 3H), 1.18 (s, 3H), 1.10 (s, 3H), 1.06 (d,  $J$  = 6.2 Hz, 6H), 1.00 (s, 3H), 0.88 (d,  $J$  = 6.0 Hz, 6H) ppm

**<sup>13</sup>C NMR (125 MHz, CDCl<sub>3</sub>):**  $\delta$  = 217.8, 144.3, 122.2, 69.7, 55.3, 47.5, 46.8, 46.5, 42.4, 41.9, 39.8, 39.3, 37.0, 36.7, 34.2, 34.1, 33.2, 32.1, 31.0, 30.9, 26.5, 25.8, 25.5, 23.7, 23.6, 22.0, 21.5, 19.7, 16.7, 15.3 ppm

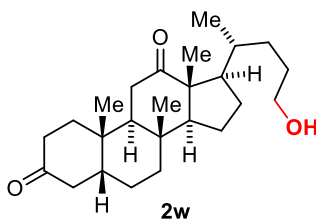

**Compound 2w.** Colorless oil.

Yield: 83%. Reaction time: 25 min at 0 °C.

The analytical data of **2w** was in accordance to the reported one. <sup>[29]</sup>

**<sup>1</sup>H NMR (500 MHz, CDCl<sub>3</sub>):**  $\delta$  = 3.62 (s, 2H), 2.64 – 2.55 (m, 2H), 2.34 (t,  $J$  = 14.8 Hz, 1H), 2.18 (d,  $J$  = 14.6 Hz, 1H), 2.10 (d,  $J$  = 12.6 Hz, 1H), 2.06 – 2.01 (m, 2H), 1.91 (d,  $J$  = 11.8 Hz, 6H), 1.75 – 1.74 (m, 1H), 1.67 – 1.59 (m, 3H), 1.49 – 1.39 (m, 4H), 1.34 – 1.30 (m, 4H), 1.25 (s, 1H),

1.11 (s, 3H), 1.06 (s, 3H), 1.01 (s, 1H), 0.87(d,  $J = 6.5$  Hz, 3H) ppm

**$^{13}\text{C}$  NMR (125 MHz,  $\text{CDCl}_3$ ):**  $\delta = 214.3, 212.2, 63.5, 58.6, 57.6, 46.7, 44.3, 43.8, 42.2, 38.4, 37.0, 36.8, 36.0, 35.6, 35.5, 31.4, 29.9, 27.7, 26.6, 25.5, 24.4, 22.2, 19.0, 11.8$  ppm

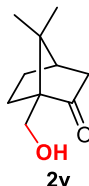

**Compound 2v.** white powder.

Yield: 89%. Reaction time: 5 min at 0 °C.

The analytical data of **2v** was in accordance to the reported one. <sup>[30]</sup>

**$^1\text{H}$  NMR (500 MHz,  $\text{CDCl}_3$ ):**  $\delta = 3.89$  (d,  $J = 11.9$  Hz, 1H), 3.67 – 3.63 (m, 1H), 2.50 (s, 1H), 2.42 (d,  $J = 18.8$  Hz, 1H), 2.08 (s, 1H), 2.01 (t,  $J = 10.7$  Hz, 1H), 1.89 – 1.82 (m, 2H), 1.61 (s, 1H), 1.40 (t,  $J = 11.4$  Hz, 1H), 1.00 (d,  $J = 11.9$  Hz, 6H) ppm

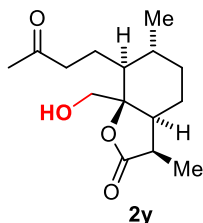

**Compound 2y.** Colorless oil.

Yield: 76%. Reaction time: 10 min at 0 °C.

The analytical data of **2y** was in accordance to the reported one. <sup>[13]</sup>

**$^1\text{H}$  NMR (500 MHz,  $\text{CDCl}_3$ )**  $\delta = 3.91$  (d,  $J = 11.7$  Hz, 1H), 3.59 (d,  $J = 11.3$  Hz, 1H), 3.14 (t,  $J = 6.7$  Hz, 2H), 2.79 – 2.75 (m, 1H), 2.62 – 2.51 (m, 2H), 2.17 (s, 3H), 2.07 – 2.04 (m, 1H), 1.70 (s, 1H), 1.60 – 1.53 (m, 2H), 1.44 (s, 2H), 1.25 (s, 1H), 1.12 (d,  $J = 6.8$  Hz, 3H), 0.98 (d,  $J = 5.1$  Hz, 3H) ppm

**$^{13}\text{C}$  NMR (125 MHz,  $\text{CDCl}_3$ )**  $\delta = 211.0, 179.6, 87.1, 61.8, 42.7, 42.4, 39.5, 38.8, 33.2, 32.2, 30.4, 24.3, 21.9, 21.1, 9.5$  ppm

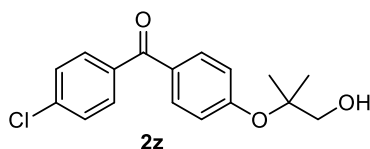

**Compound 2z.** white flaky crystal.

Yield: 77%. Reaction time: 20 min at 0 °C.

The analytical data of **2z** was in accordance to the reported one. <sup>[14]</sup>

**<sup>1</sup>H NMR (500 MHz, CDCl<sub>3</sub>):**  $\delta$  = 7.75 – 7.71 (m, 4H), 7.45 (d,  $J$  = 8.6 Hz, 2H), 7.07 (d,  $J$  = 8.7 Hz, 2H), 3.63 (s, 2H), 2.31 (s, 1H), 1.37 (s, 6H) ppm

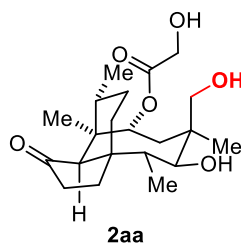

**Compound 2aa.** White powder solid.

Yield: 82%. Reaction time: 10 min at 0 °C.

**<sup>1</sup>H NMR (500 MHz, CDCl<sub>3</sub>):**  $\delta$  = 5.52 (d,  $J$  = 7.5 Hz, 1H), 4.36 (d,  $J$  = 10.9 Hz, 1H), 4.05 (q,  $J$  = 17.2 Hz, 2H), 3.58 (d,  $J$  = 10.4 Hz, 1H), 3.47 (s, 1H), 3.29 (s, 2H), 2.44 (s, 1H), 2.28 – 2.14 (m, 2H), 2.07 (s, 1H), 1.91 – 1.86 (m, 1H), 1.77 (d,  $J$  = 13.8 Hz, 1H), 1.68 – 1.60 (m, 2H), 1.47 (d,  $J$  = 11.9 Hz, 2H), 1.39 (s, 3H), 1.23 (s, 1H), 1.18 (s, 3H), 1.13 (d,  $J$  = 15.7 Hz, 2H), 0.97 (d,  $J$  = 3.8 Hz, 3H), 0.67 (d,  $J$  = 4.6 Hz, 3H) ppm

**<sup>13</sup>C NMR (125 MHz, CDCl<sub>3</sub>):**  $\delta$  = 217.2, 173.1, 76.0, 70.6, 67.3, 61.3, 57.8, 45.5, 41.8, 41.7, 36.5, 35.3, 34.5, 30.3, 29.7, 27.1, 26.0, 24.7, 17.0, 14.6, 11.2 ppm

**HRMS (ESI)** for C<sub>21</sub>H<sub>34</sub>O<sub>6</sub>Na [M+Na]<sup>+</sup>: calcd . 405.2253, found: 405.2250.

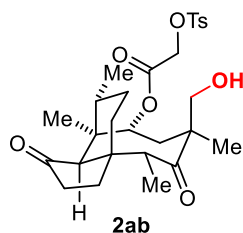

**Compound 2ab.** White powder solid.

Yield: 80%. Reaction time: 13 min at 0 °C.

**<sup>1</sup>H NMR (500 MHz, CDCl<sub>3</sub>):**  $\delta$  = 7.82 (d,  $J$  = 8.3 Hz, 2H), 7.36 (d,  $J$  = 8.4 Hz, 2H), 5.89 (d,  $J$  = 9.2 Hz, 1H), 4.54 (s, 2H), 4.03 (d,  $J$  = 11.6 Hz, 1H), 3.81 (d,  $J$  = 11.7 Hz, 1H), 3.47 (q,  $J$  = 6.7 Hz, 1H), 2.46 (s, 3H), 2.30 – 2.21 (m, 1H), 2.18 – 2.10 (m, 2H), 1.88 (dd,  $J$  = 15.9, 9.3 Hz, 1H), 1.67 – 1.58 (m, 3H), 1.57 – 1.48 (m, 1H), 1.46 – 1.37 (m, 6H), 1.18 – 1.11 (m, 1H), 1.06 (d,  $J$  = 6.6 Hz, 3H), 1.03 (s, 3H), 0.70 (d,  $J$  = 7.0 Hz, 3H) ppm

**<sup>13</sup>C NMR (125 MHz, CDCl<sub>3</sub>):**  $\delta$  = 216.3, 216.2, 166.7, 145.6, 132.5, 130.0, 128.1, 72.0, 67.9, 64.9, 58.6, 53.6, 45.2, 43.6, 41.9, 39.1, 37.0, 34.6, 29.9, 26.9, 24.2, 21.7, 21.3, 17.3, 14.7, 12.3 ppm

**HRMS (ESI)** for C<sub>28</sub>H<sub>38</sub>O<sub>8</sub>SNa [M+Na]<sup>+</sup>: calcd. 557.2185, found: 557.2176.

#### 4. References:

1. Y. Lin, L. Zhu, Y. Lan and Y. Rao, *Chem. Eur. J.*, 2015, **21**, 14937.
2. C. U. Pittman and R. M. Hanes, *J. Org. Chem.*, 1977, **42**, 1194.
3. M. Z. Zhu, E. Ruijter and L. A. Wessjohann, *Org. Lett.*, 2004, **6**, 3921.
4. M. M. Wang, X. S. Ning, J. P. Qu and Y. B. Kang, *ACS catal.*, 2017, **7**, 4000.
5. Y. Q. Mu, M. Nodwell, J. L. Pace, J. Shaw and J. K. Judice, *Bioorg. Med. Chem. Lett.*, 2004, **14**, 735.
6. J. R. Vakiti and S. Ghosh, *Tetrahedron Lett.*, 2014, **55**, 6438.
7. Z. Y. Jiang, W. H. Chan and A. W. M. Lee, *J. Org. Chem.*, 2005, **70**, 1081.
8. A. Throup, L. H. Patterson and H. M. Sheldrake, *Org. Biomol. Chem.*, 2016, **14**, 9554.
9. G. Ding, C. J. Li, Y. F. Shen, B. Lu, Z. G. Zhang and X. M. Xie, *Adv. Synth. Catal.*, 2016, **358**, 1241.
10. L. Chen, J. B. Wu, F. Lei, S. Qian and Y. Wu, *J. Asian. Nat. Prod. Res.*, 2012, **14**, 355.
11. V. C. Edelsztejn, P. H. D. Chenna and G. Burton, *Tetrahedron*, 2009, **65**, 3615.
12. T. Polonski, *J. Chem. Soc. Perkin Trans.*, 1983, 305.
13. H. J. Chen, H. D. Hao and Y. K. Wu, *Eur. J. Org. Chem.*, 2015, 4423.
14. M. Craighead, R. Palin, N. Murray and D. Lindsay, WO 2012063085.
15. M. F. Richter, B. S. Drown, A. P. Riley, A. Garcia, T. Shirai, R. L. Svec and P. J. Hergenrother, *Nature*, 2017,

545, 299.

16. B. B. Liu, F. L. Jin, T. J. Wang, X. R. Yuan and W. Han, *Angew. Chem. Int. Ed.*, 2017, **56**, 12712.
17. T. Osako, K. Torii, S. Hirata and Y. Uozumi, *ACS Catal.*, 2017, **7**, 7371.
18. J. Bálint, I. Markovits, G. Egri, Z. Tuza, L. Párkányi and E. Fogassy, *Tetrahedron Asy.*, 2001, **12**, 719.
19. (a) P. C. Meltzer, D. Butler, J. R. Deschamps and B. K. Madras, *J. Med. Chem.*, 2006, **49**, 1420. (b) W. Michaelis, J. H. Russel and O. Schindler, *J. Med. Chem.*, 1970, **13**, 497.
20. S. S. Husain, S. Nirthanam, D. Ruesch, K. Solt, Q. Cheng, G. D. Li, E. Arevalo, R. W. Olsen, D. E. Raines, S. A. Forman, J. B. Cohen and K. W. Miller, *J. Med. Chem.*, 2006, **49**, 4818.
21. K. Yahata, M. Minami, K. Watanabe and H. Fujioka, *Org. Lett.*, 2014, **16**, 3680.
22. C. F. Nutaitis and G. W. Gribble, *Tetrahedron Lett.*, 1983, **24**, 4287.
23. T. Kusakabe, Y. Ito, M. Kamimura, T. Shirai, K. Takahashi, T. Mochida and K. Kato, *Chem. Asian. J.*, 2017, **6**, 1086.
24. M. Linuma, K. Moriyama and H. Togo, *Eur. J. Org. Chem.*, 2014, 772.
25. D. Crépin, J. Dawick and C. Aissa, *Angew. Chem. Int. Ed.*, 2010, **49**, 620.
26. K. Vega-Hernández, R. Senatore, M. Miele, E. Urban, W. Holzer and V. Pace, *Org. Biomol. Chem.*, 2019, **17**, 1970.
27. I. M. Pinilla, M. B. Martínez and J. A. Galbis, *Macromolecules*, 2002, **35**, 2985.
28. S. Qian, H. J. Li, Y. Chen, W. Y. Zhang, S. Y. Yang and Y. Wu, *J. Nat. Prod.*, 2010, **73**, 1743.
29. H. P. Hsieh, J. G. Muller and C. J. Burrows, *Bioorg. Med. Chem.*, 1995, **3**, 823.
30. B. Föhlisch, D. A. Bakr and P. Fischer, *J. Org. Chem.*, 2002, **67**, 3682.

## 5. $^1\text{H}$ and $^{13}\text{C}$ NMR Spectra

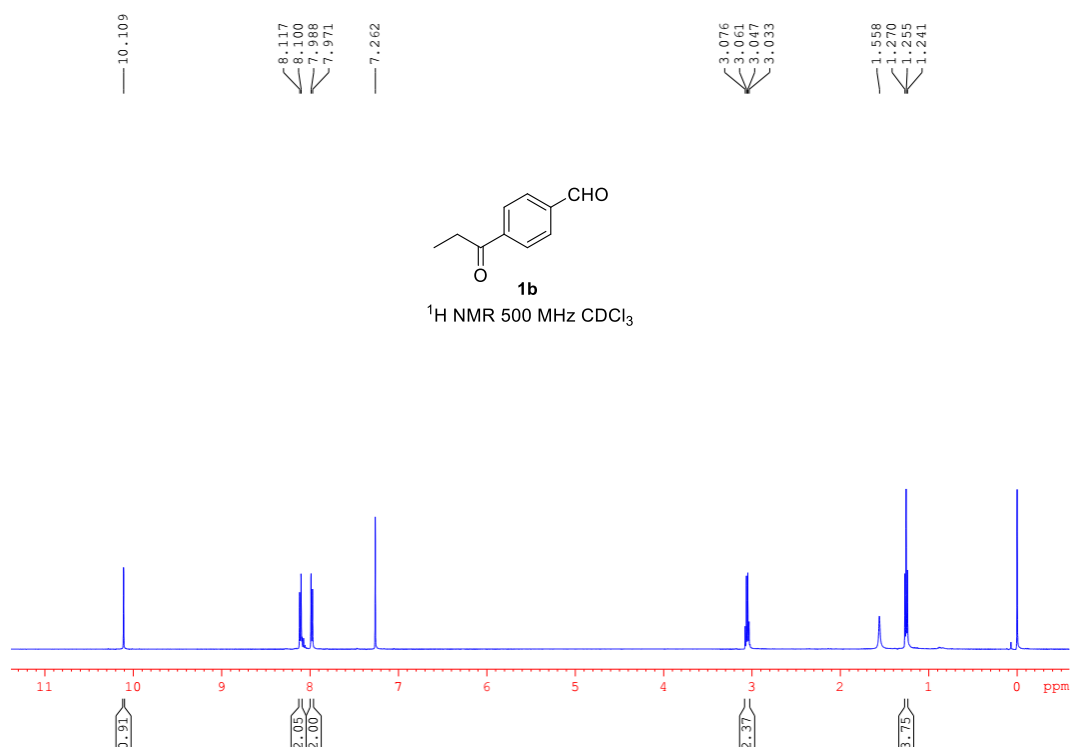

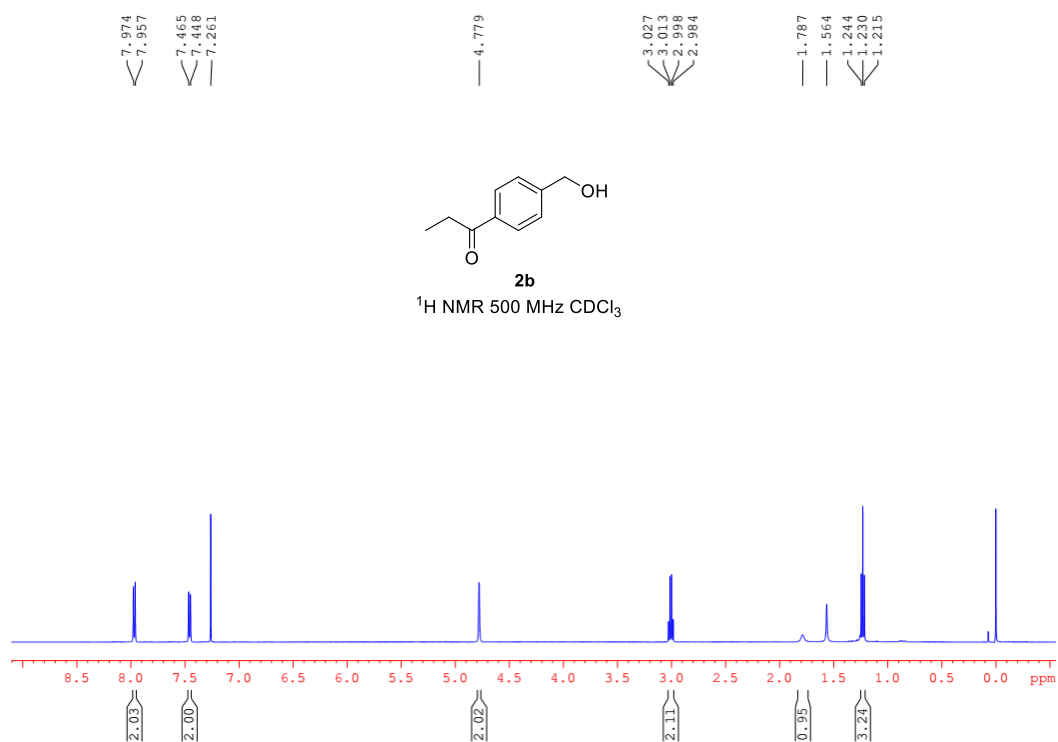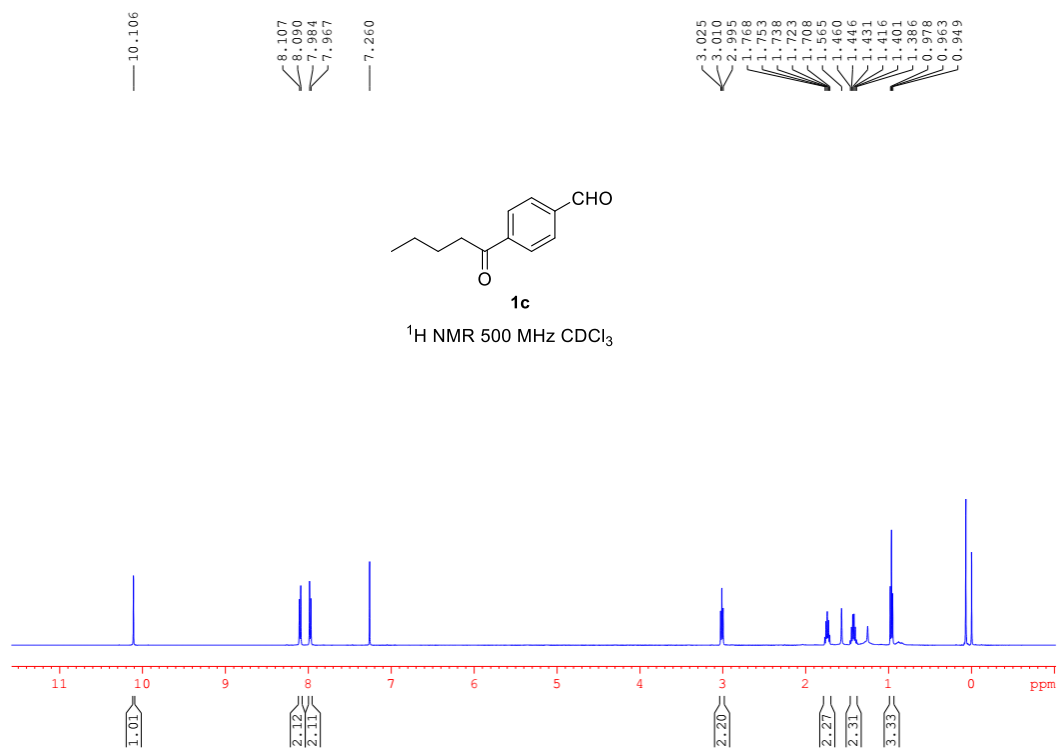

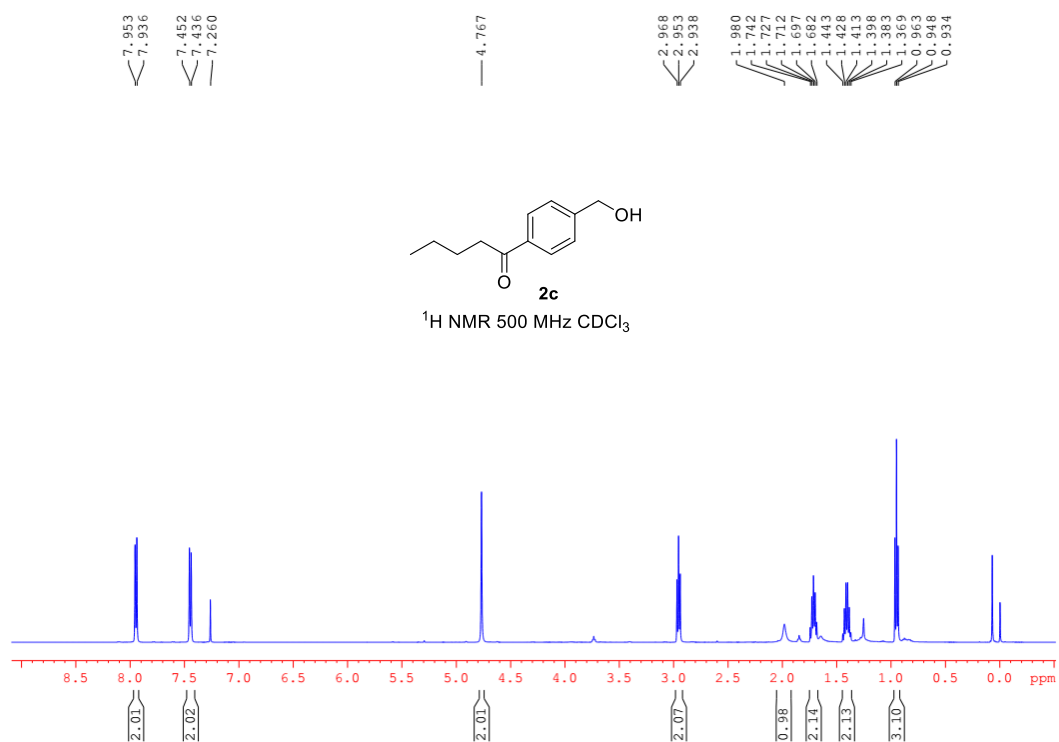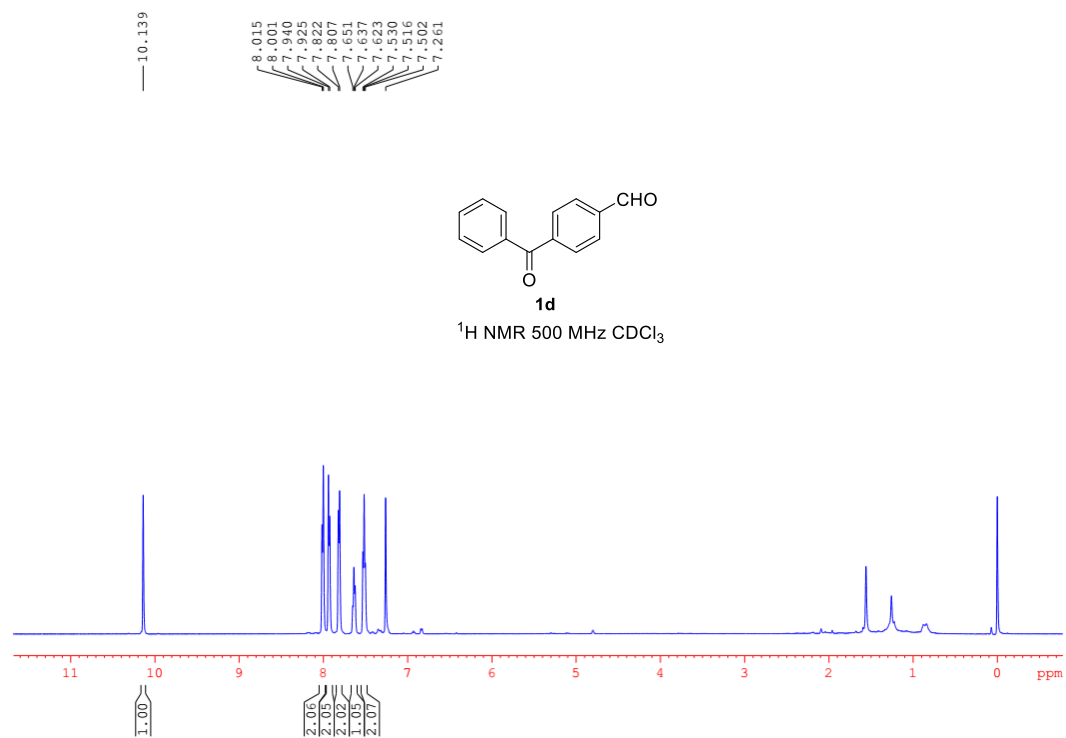

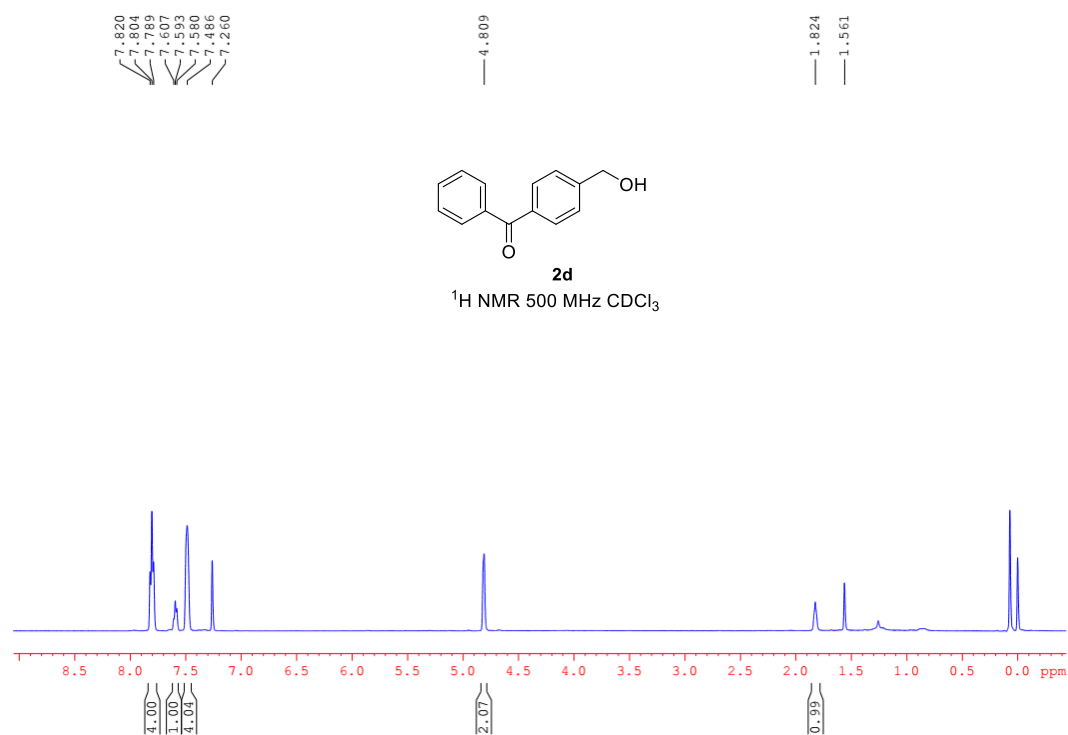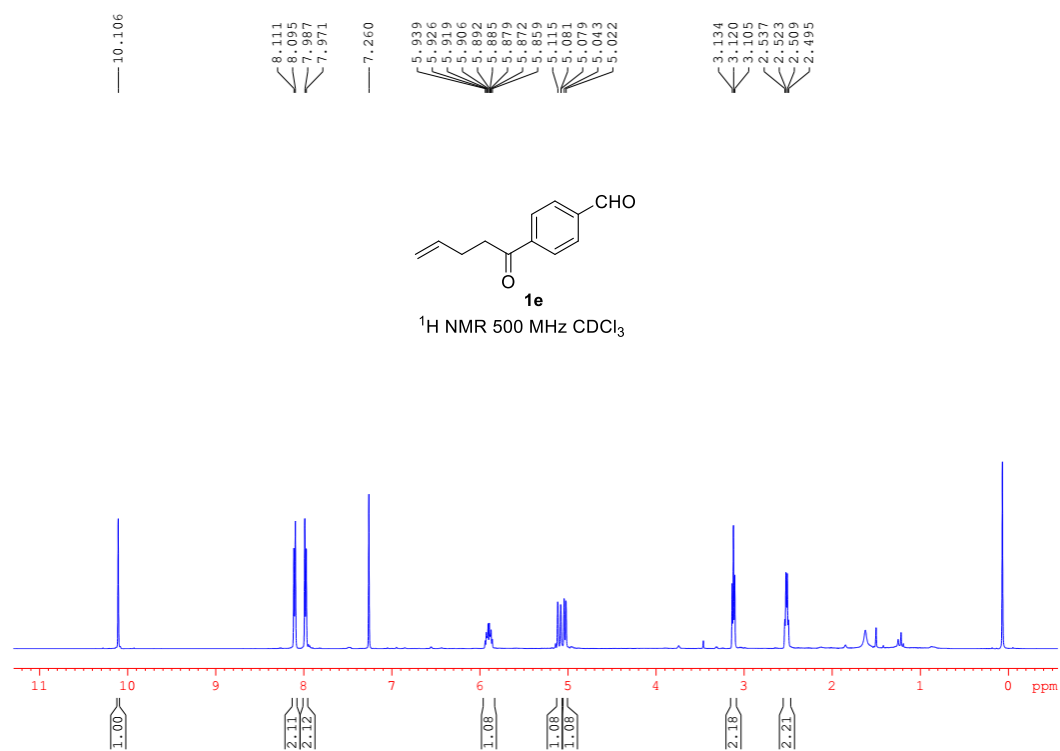

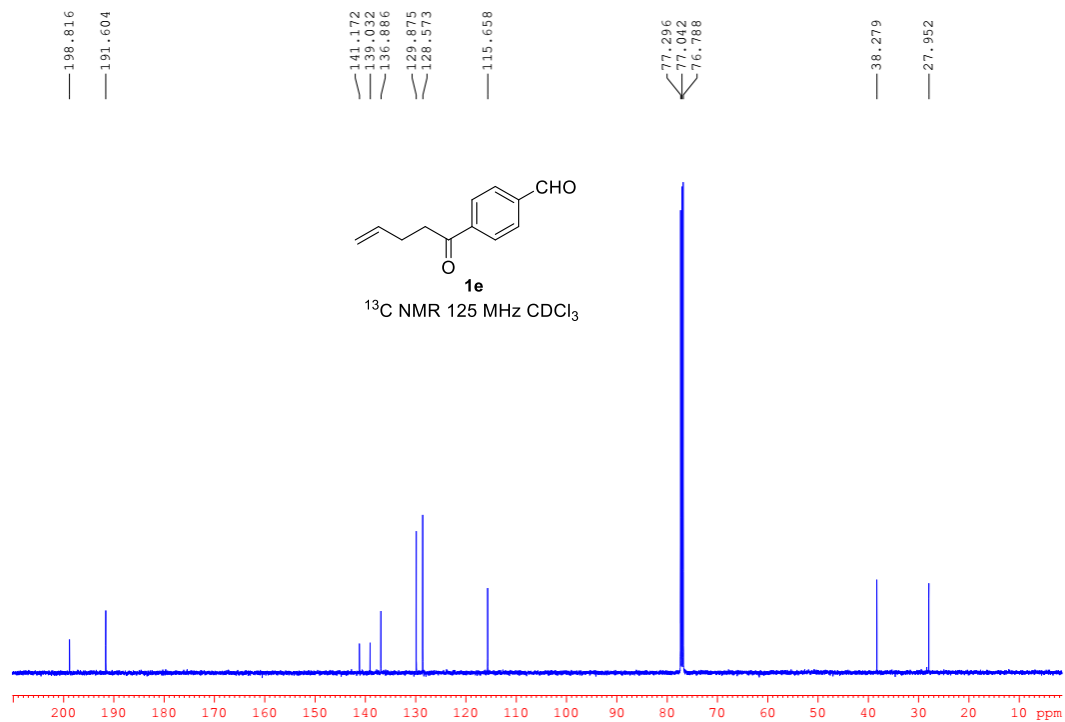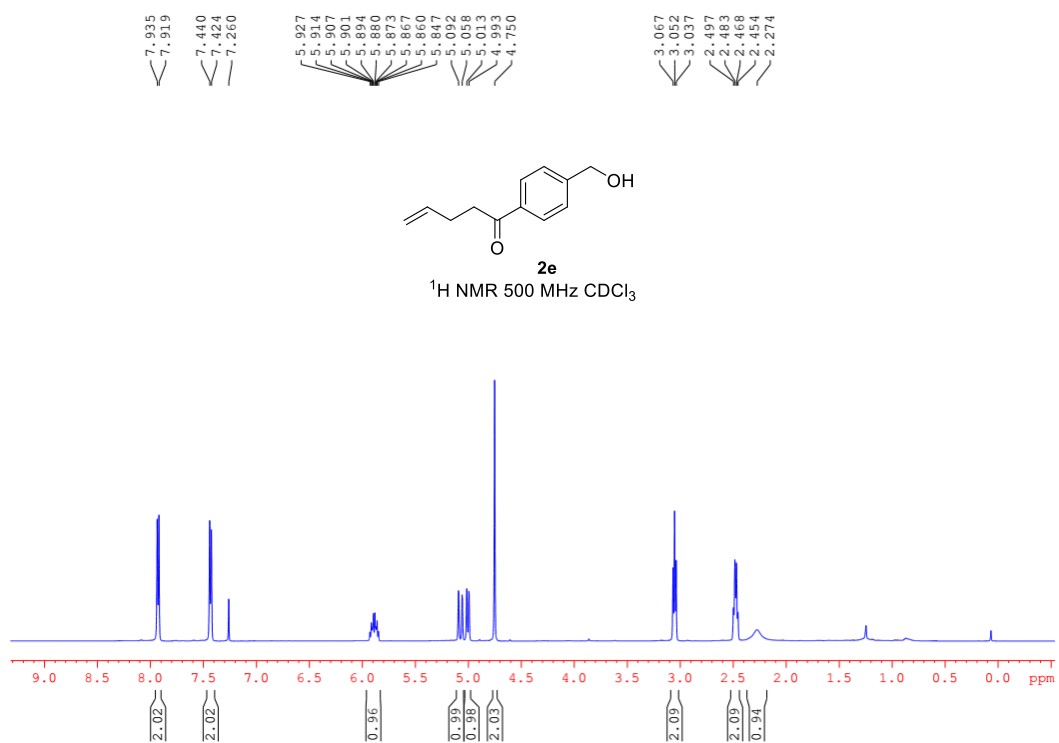

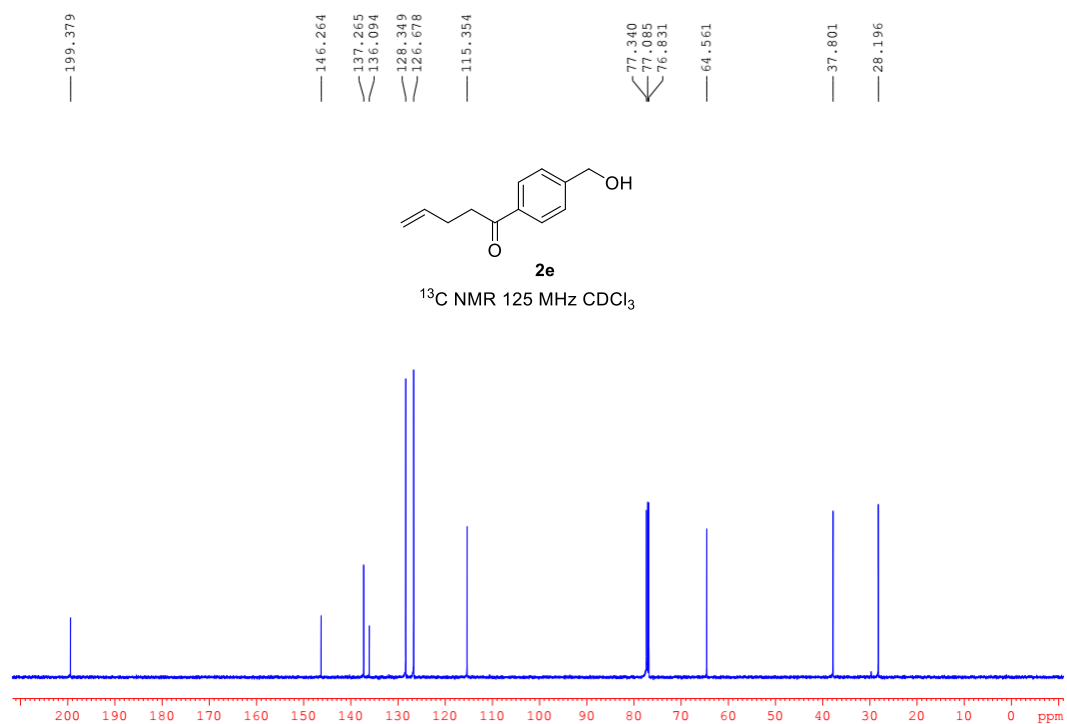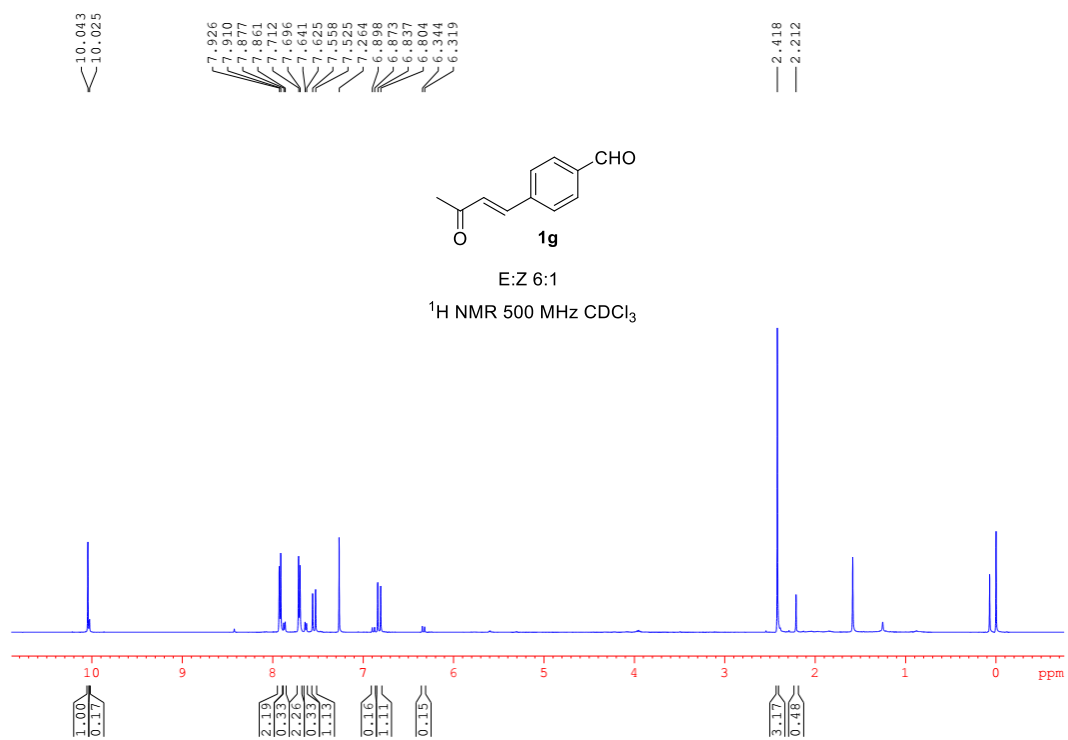

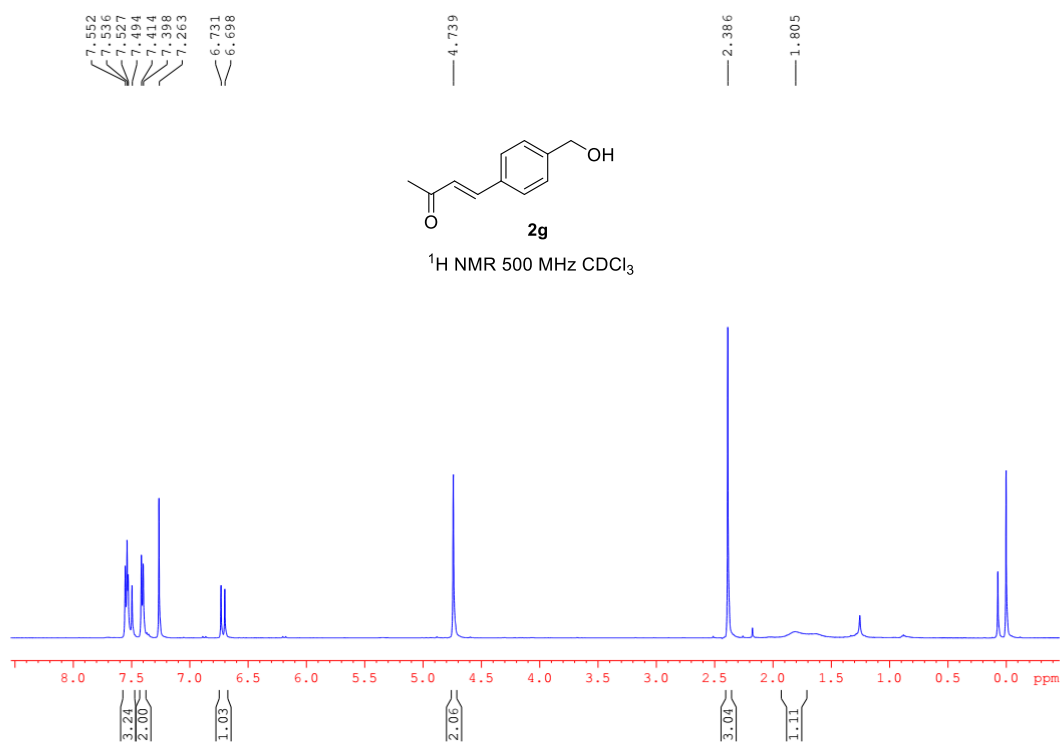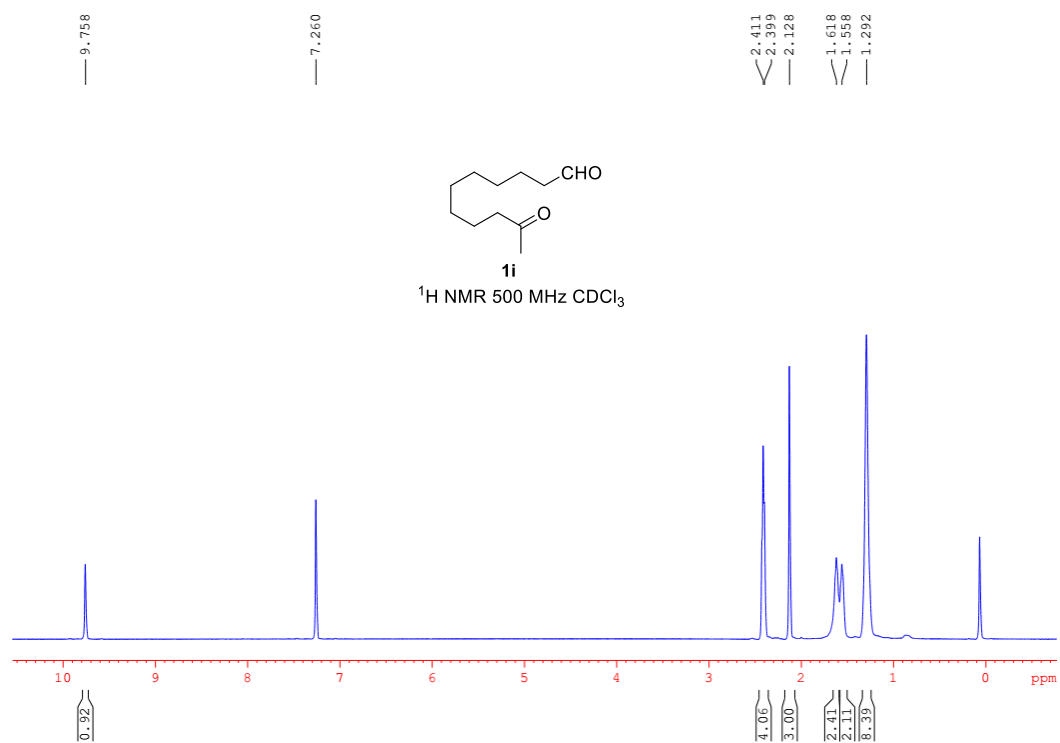

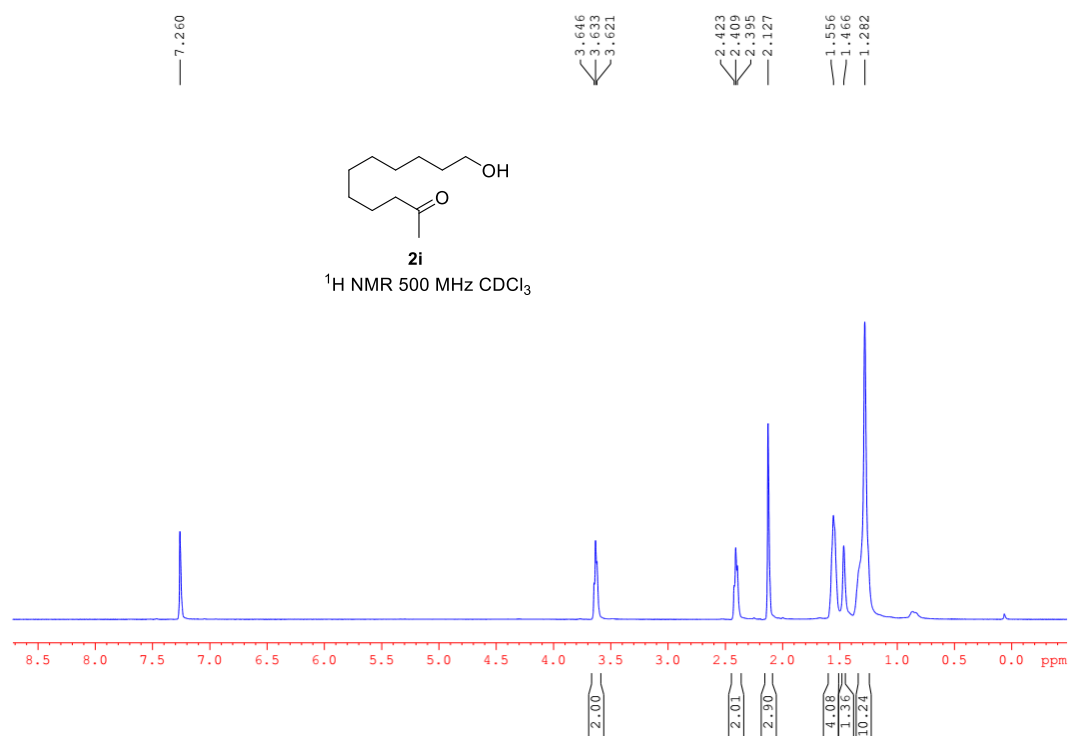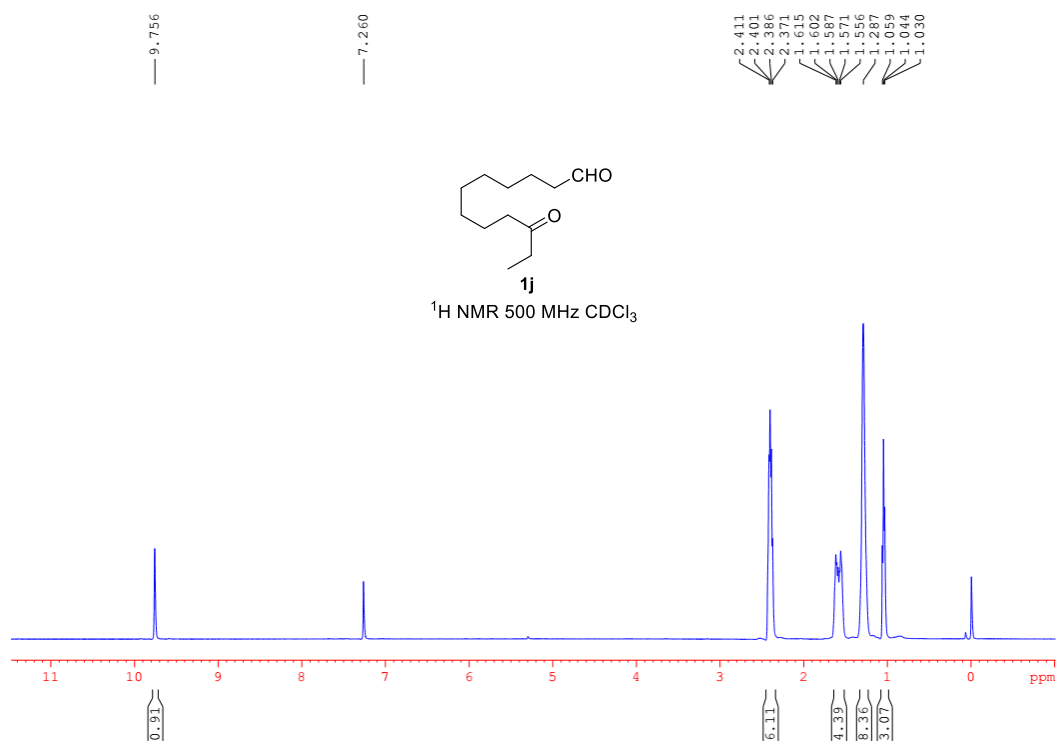

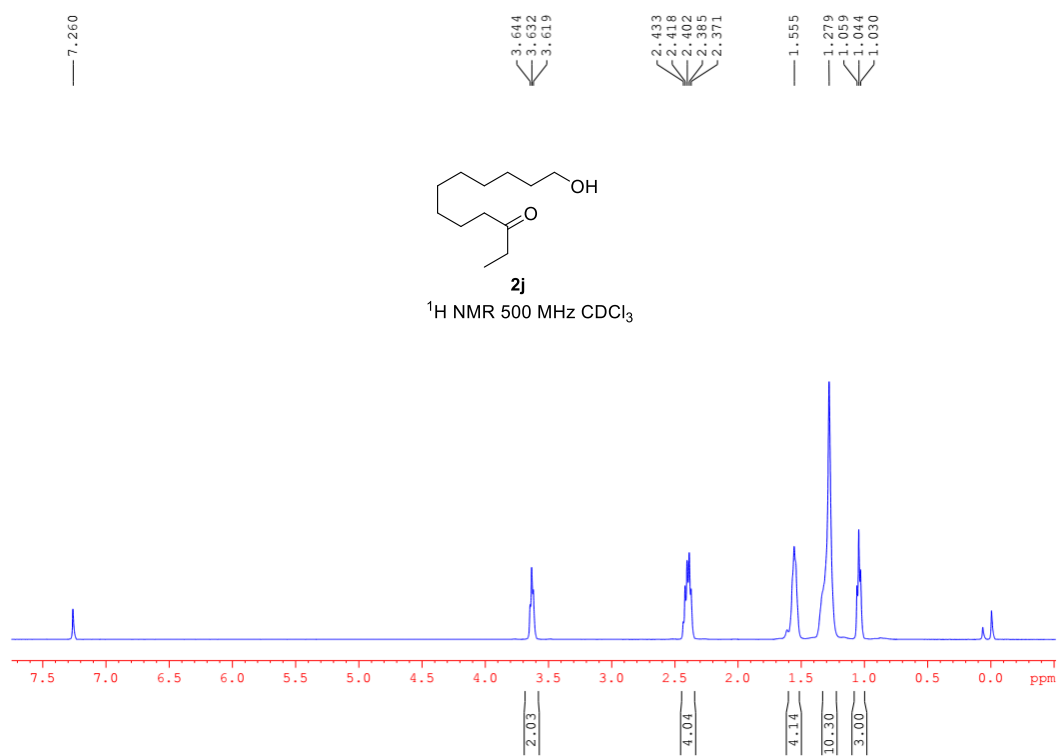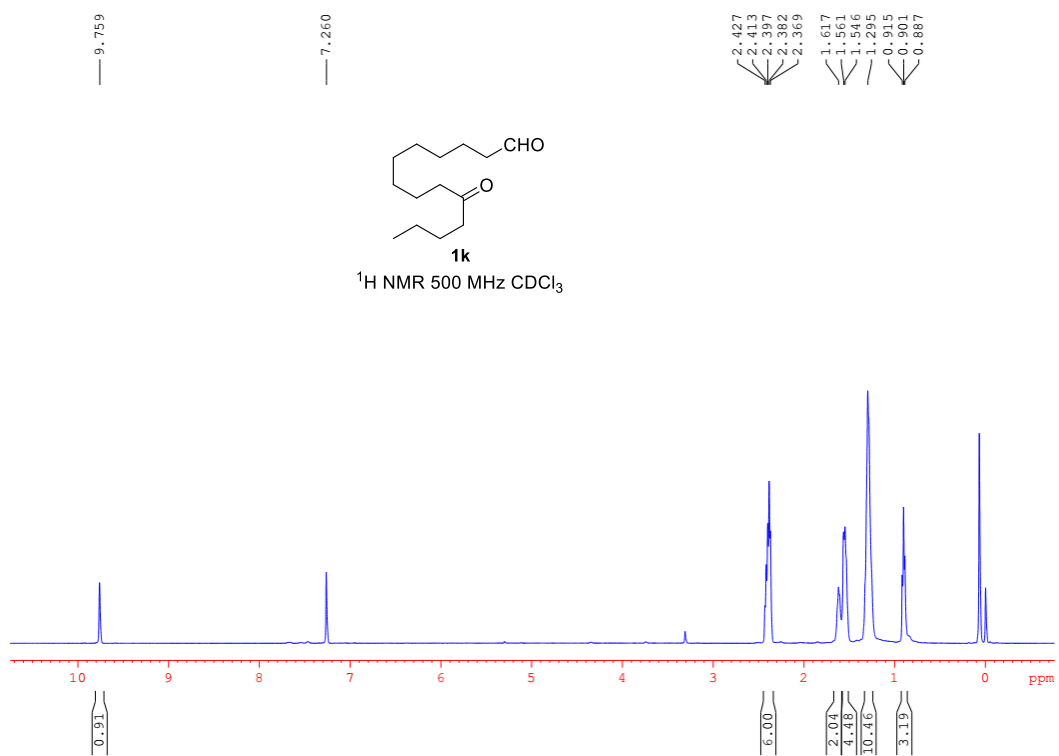

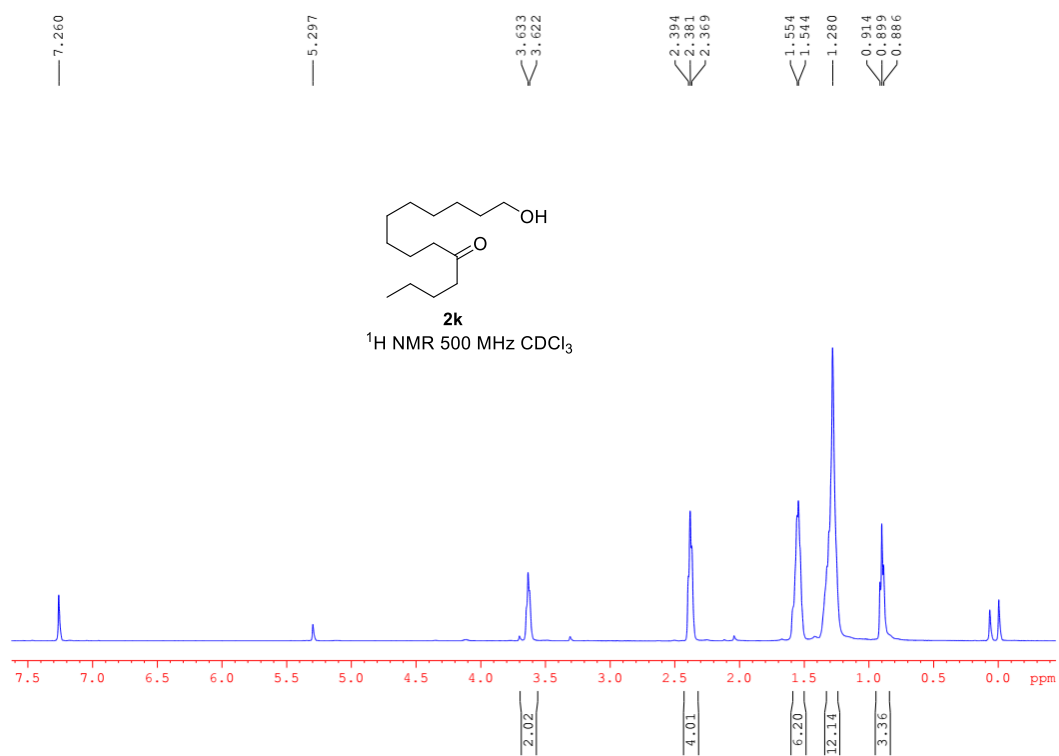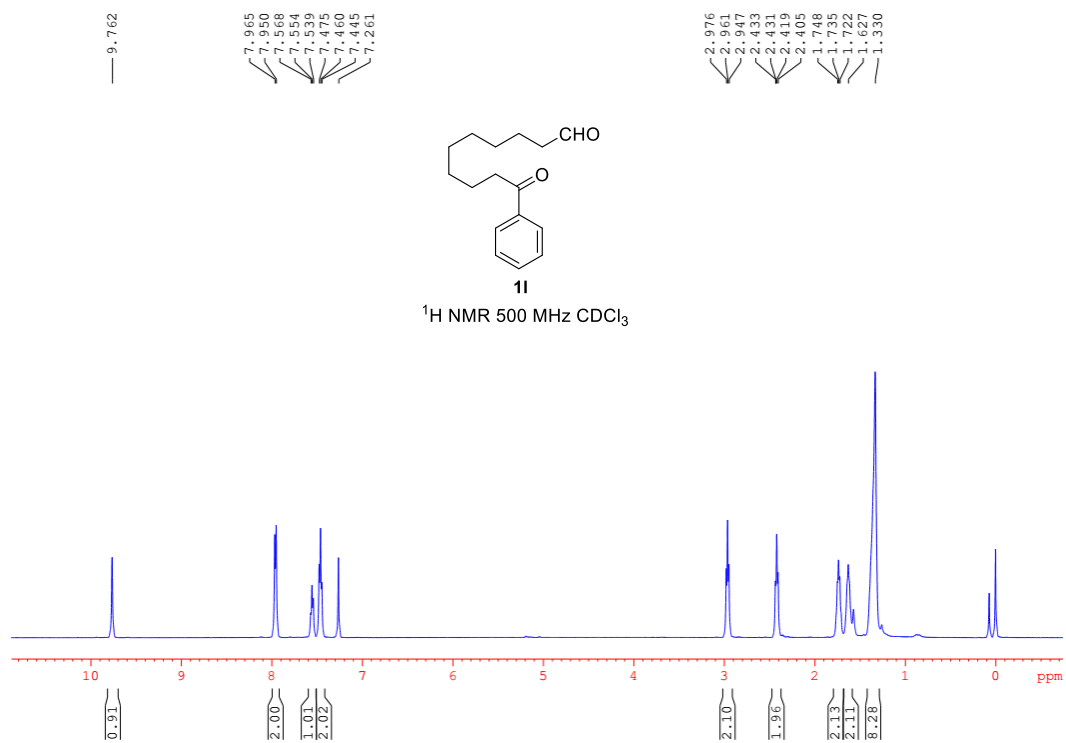

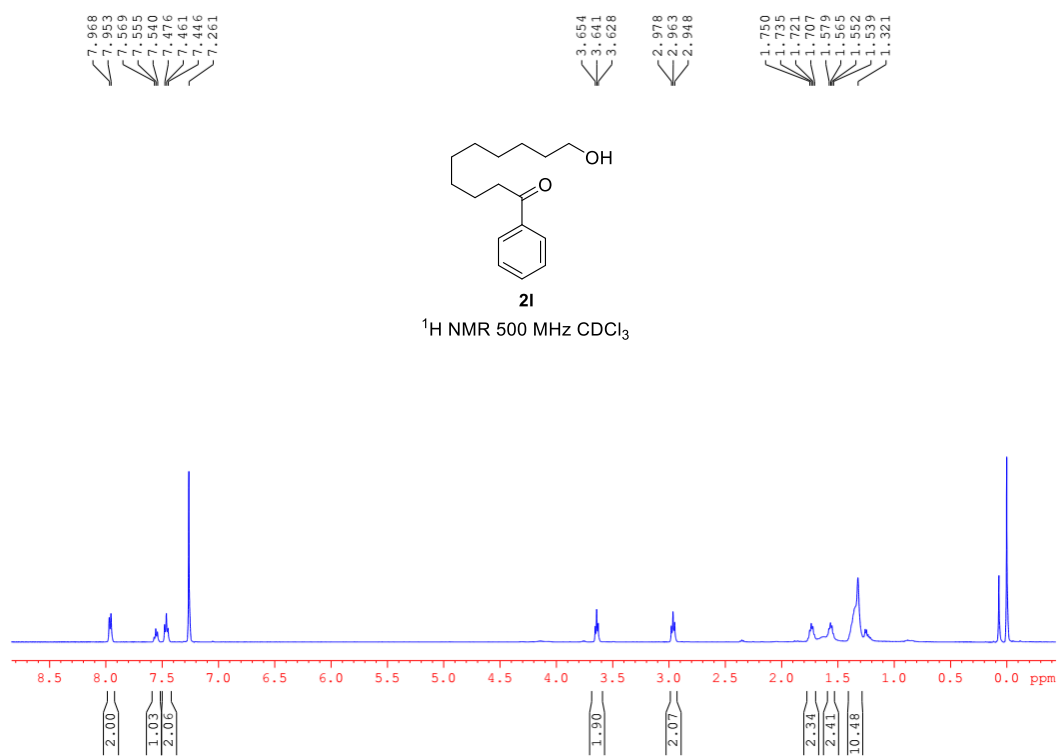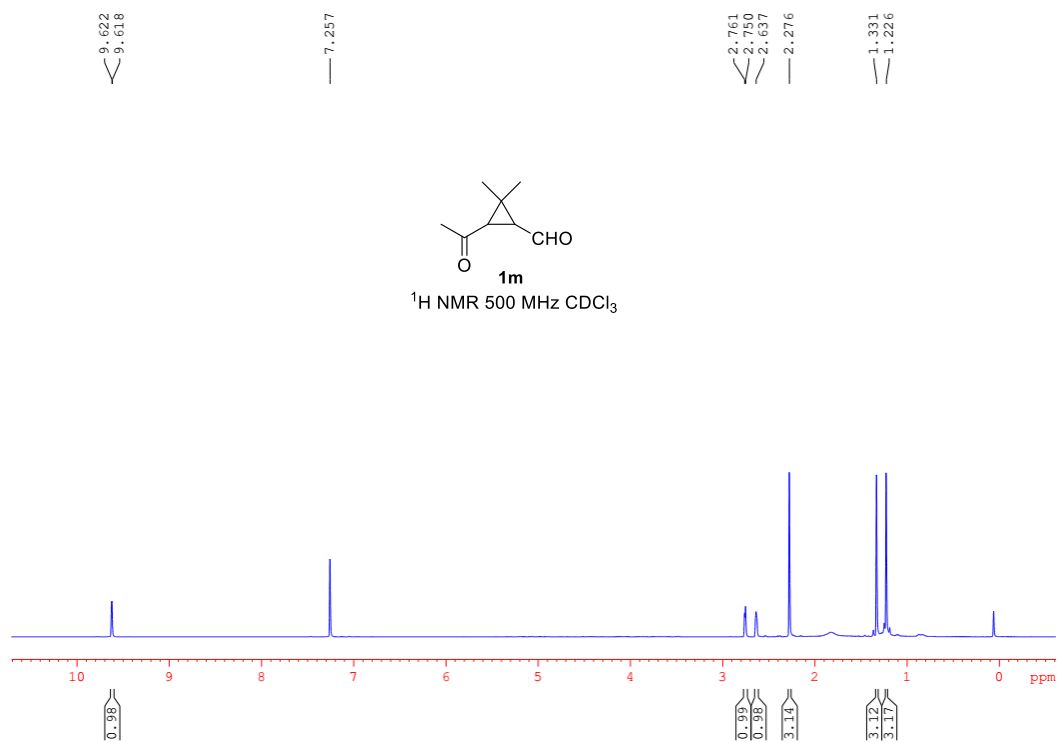

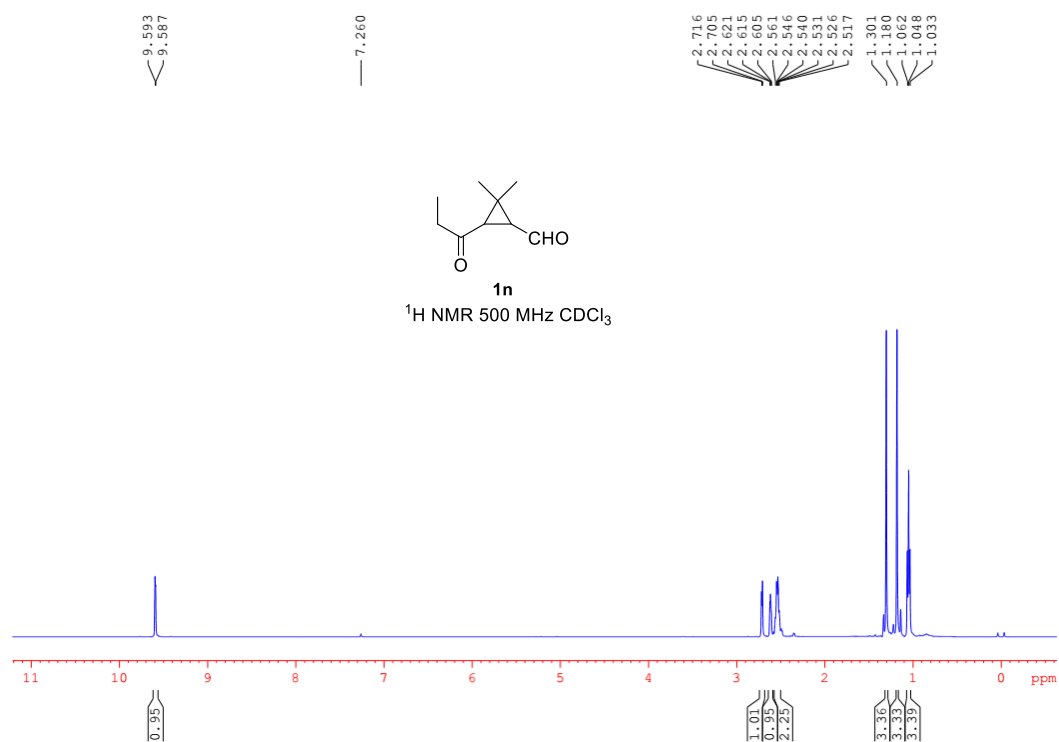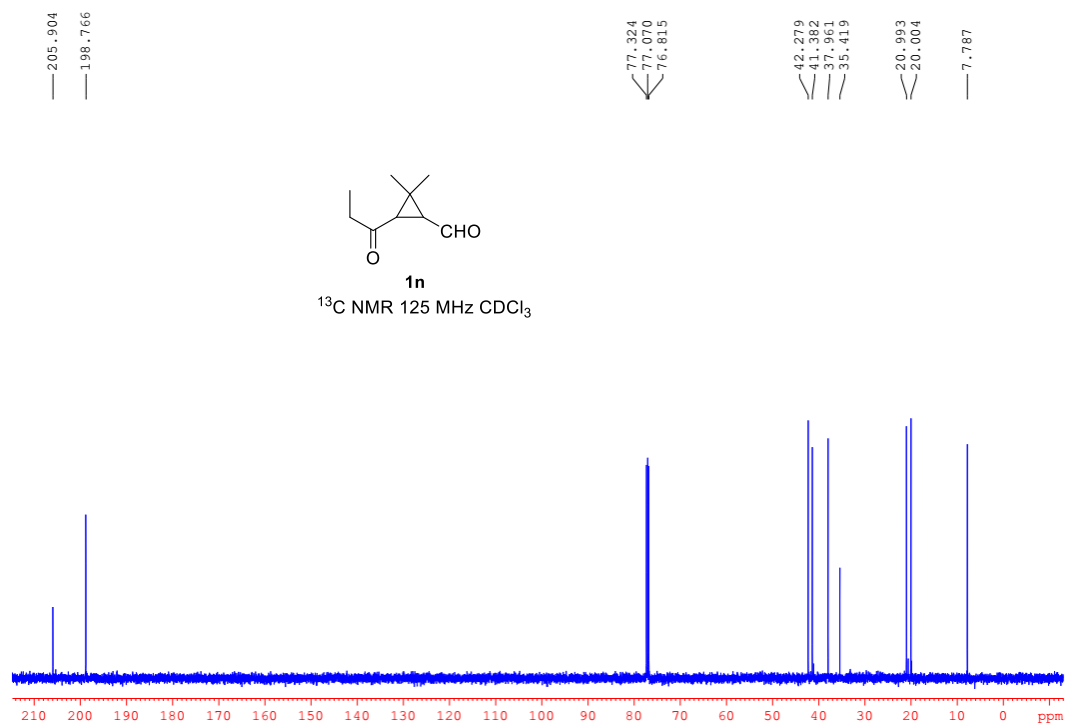

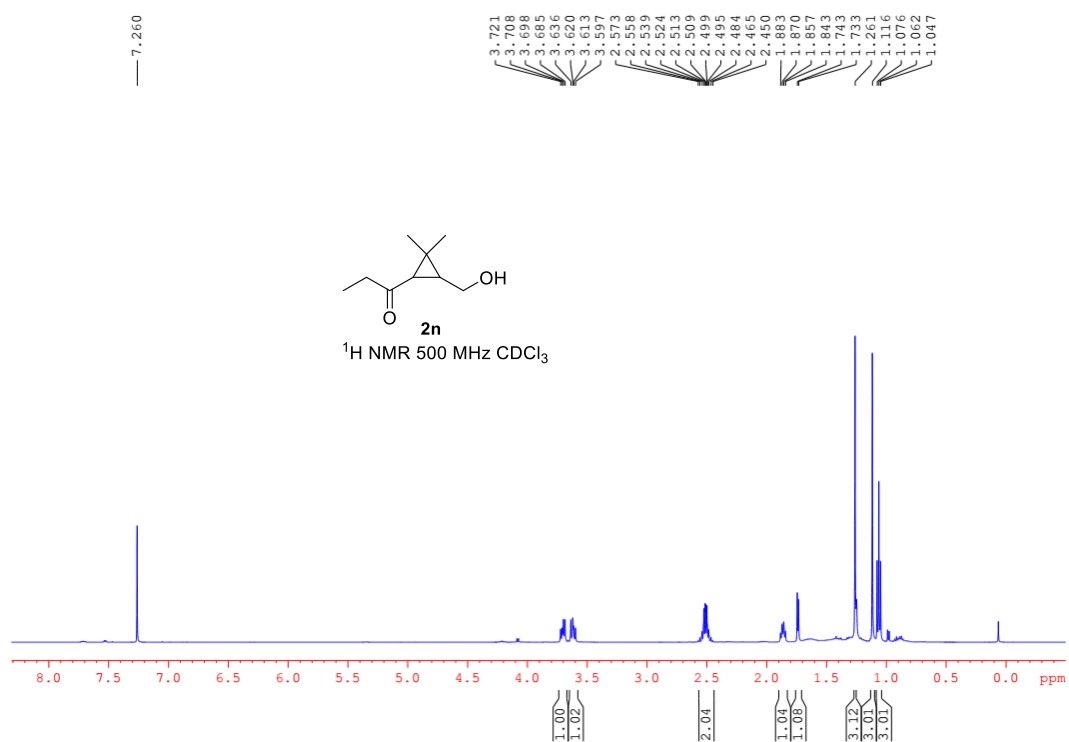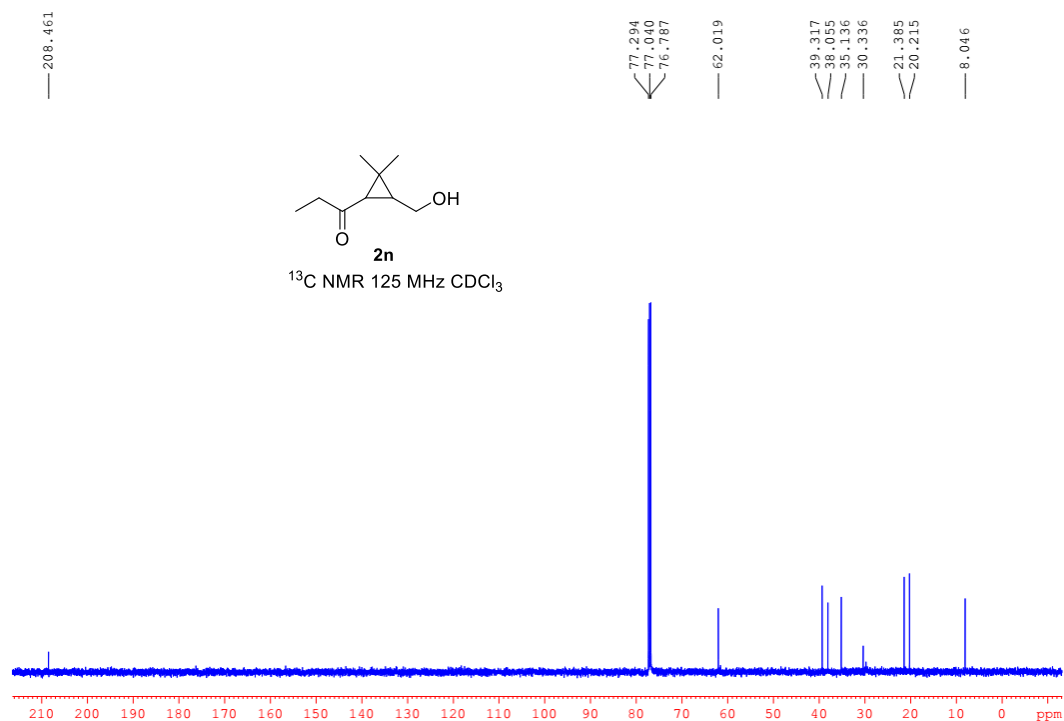

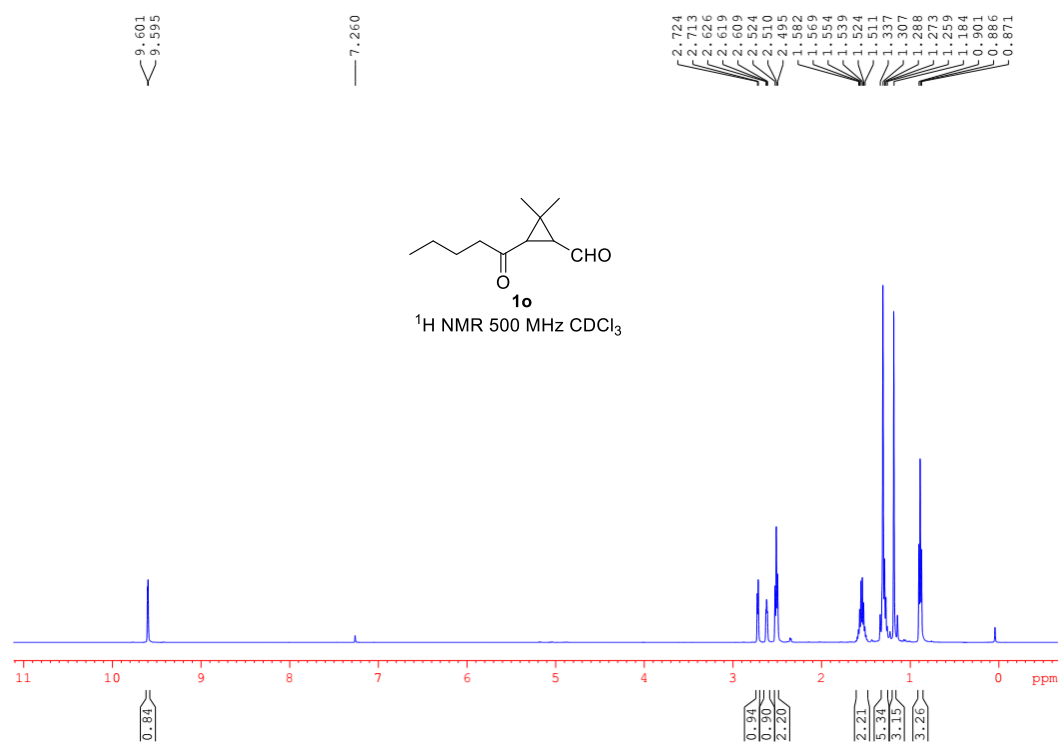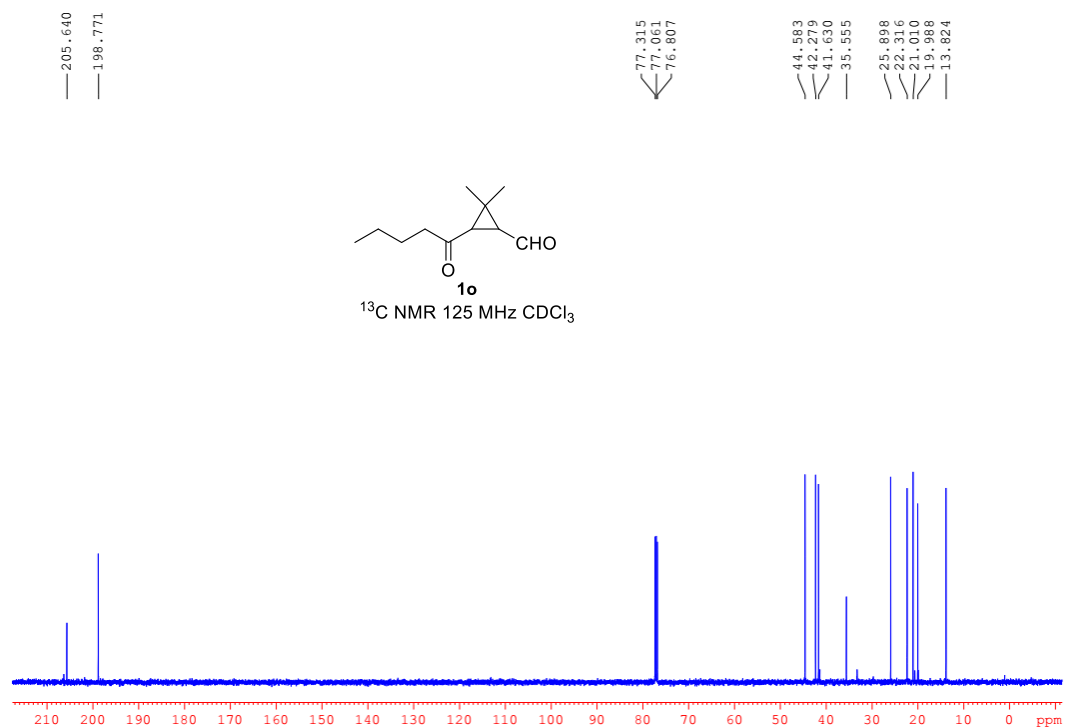

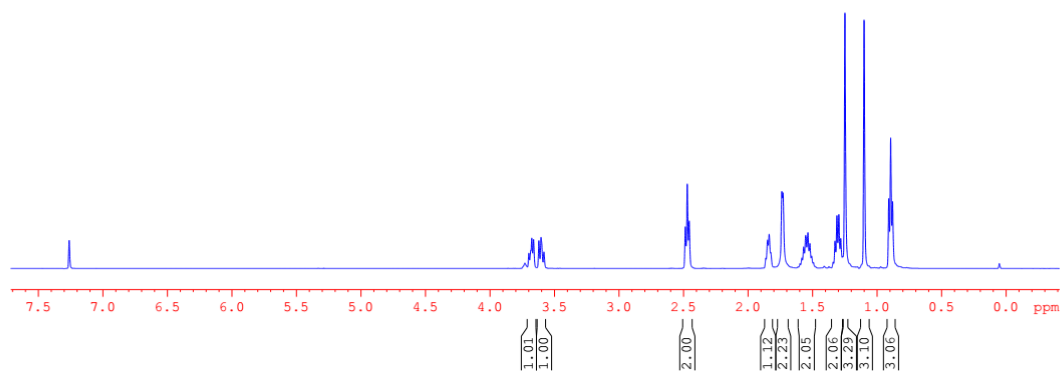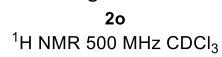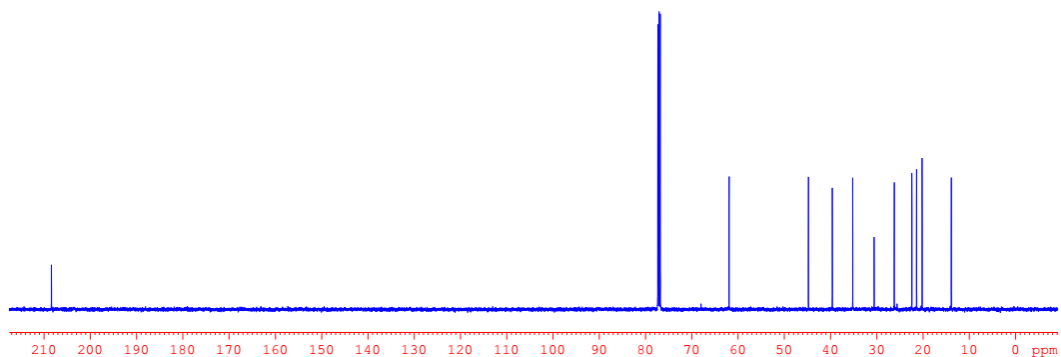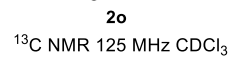

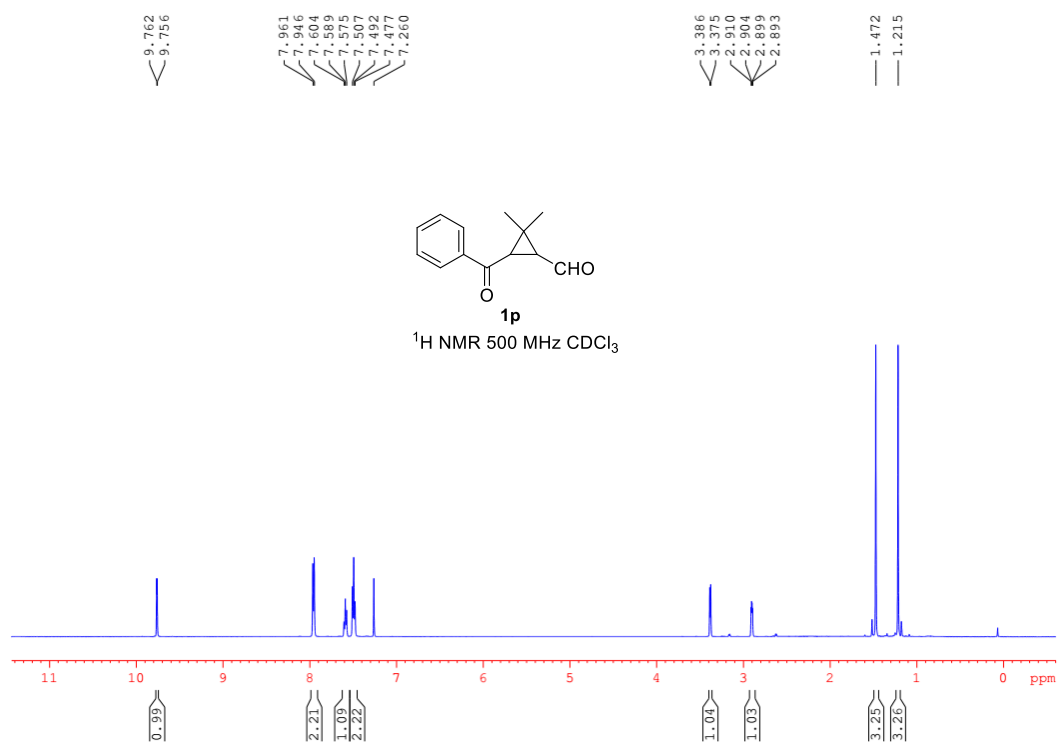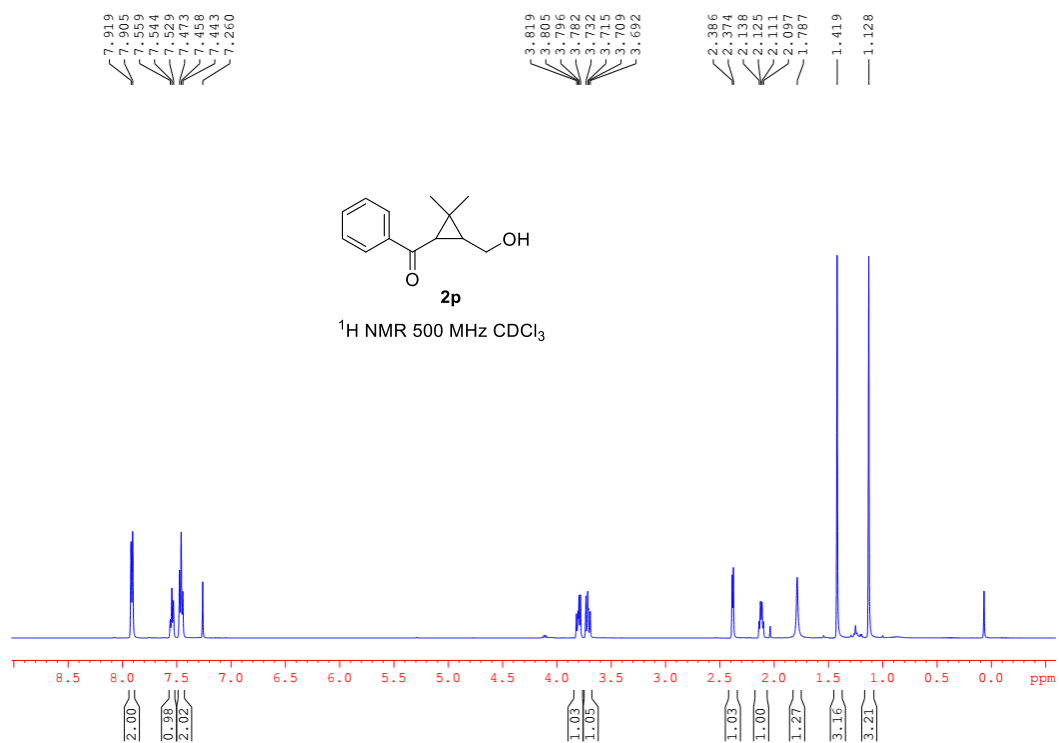

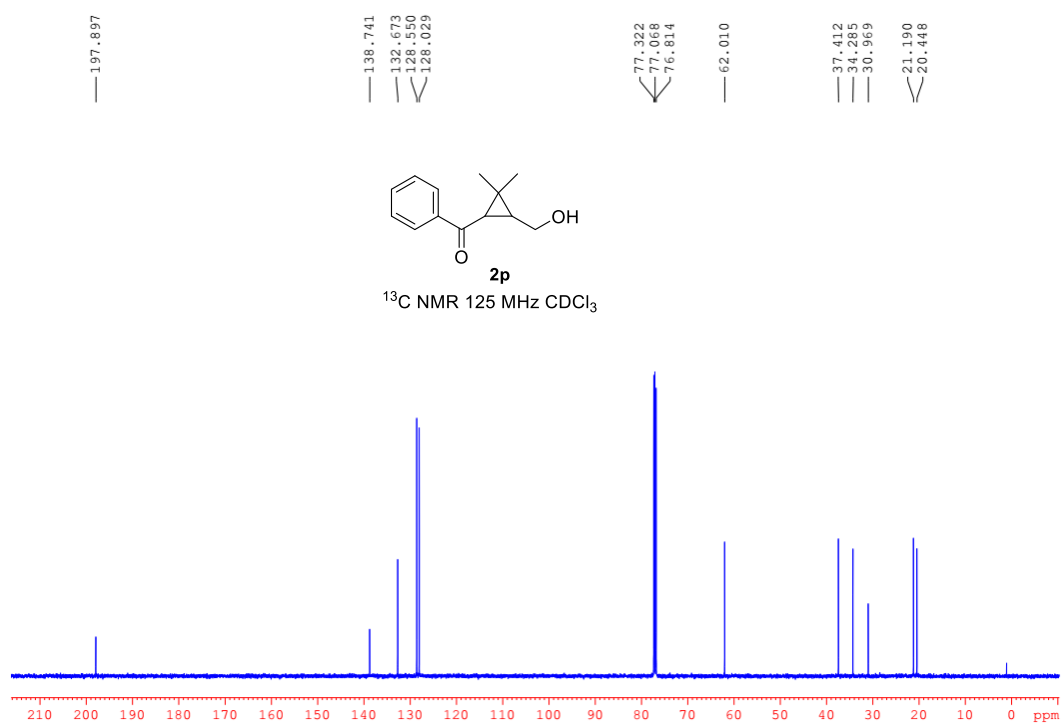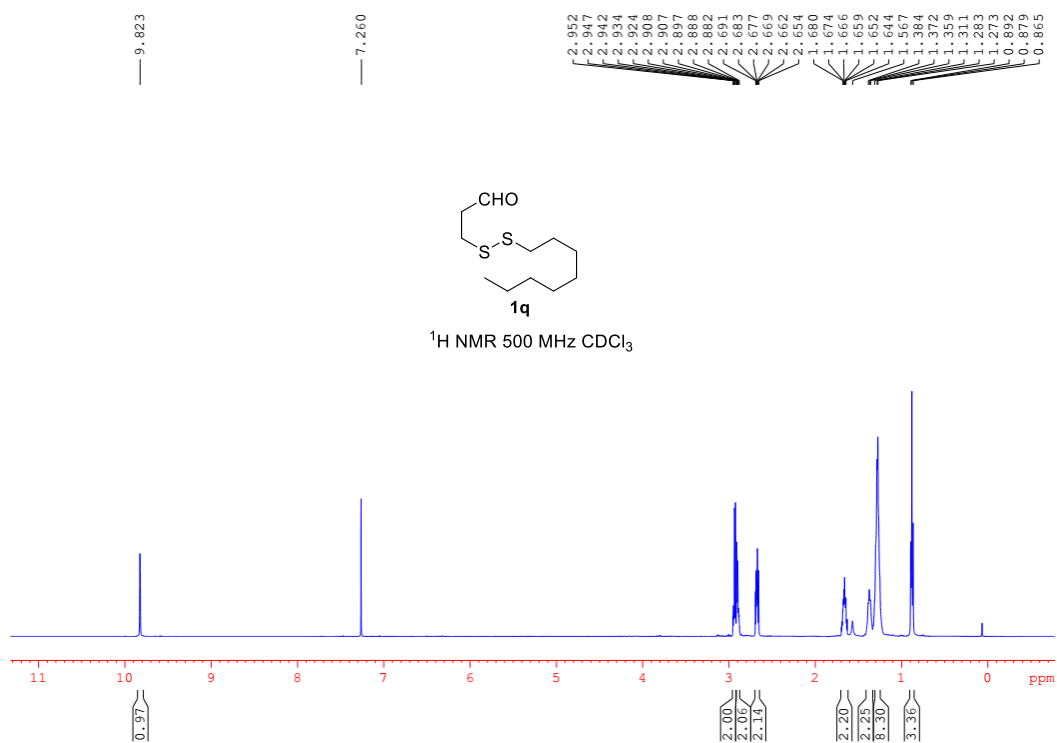

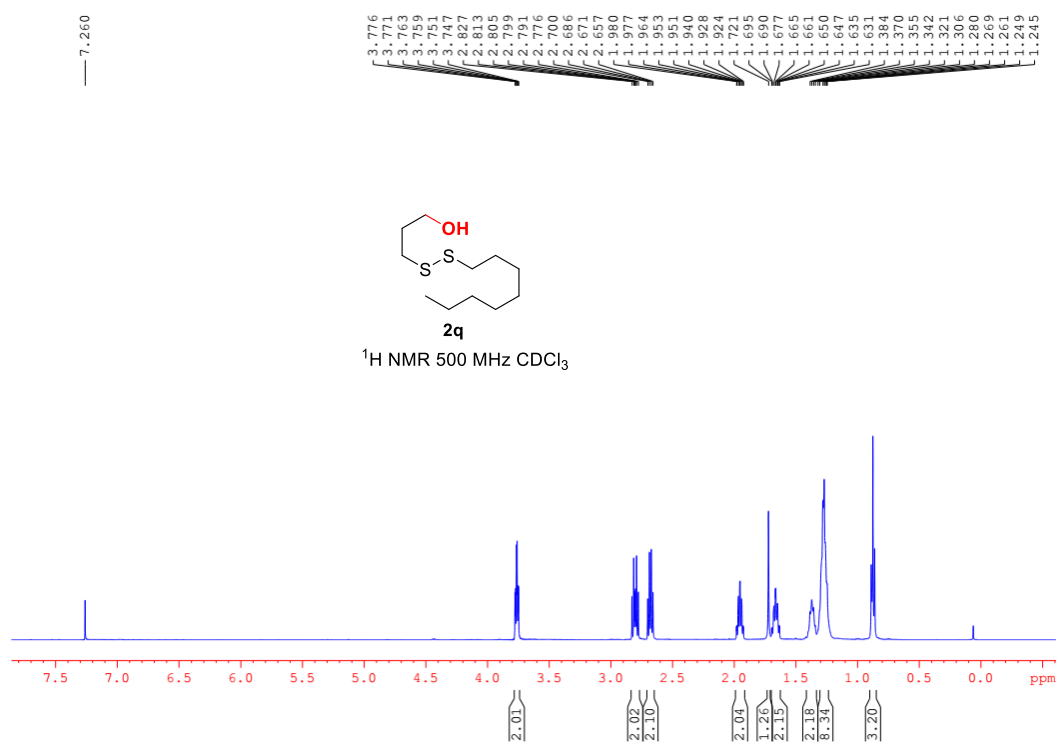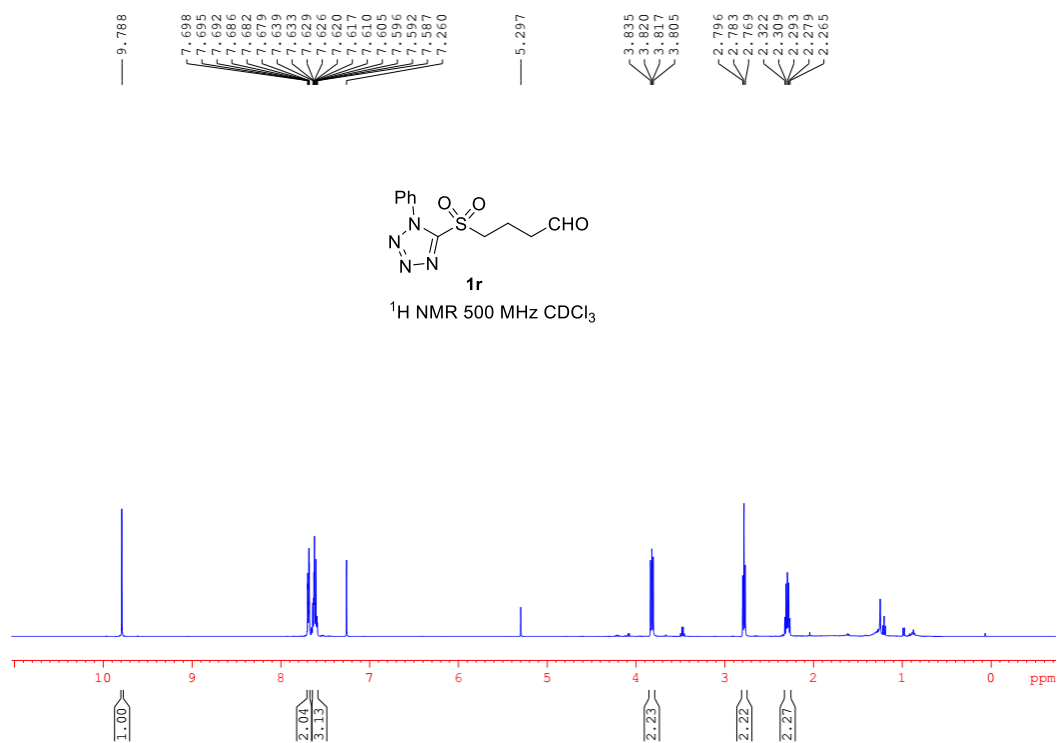

7.695  
7.692  
7.689  
7.683  
7.679  
7.676  
7.629  
7.623  
7.619  
7.616  
7.610  
7.600  
7.595  
7.586  
7.582  
7.578  
7.260

3.829  
3.814  
3.798  
3.734  
3.722  
3.710

2.120  
2.105  
2.094  
2.089  
2.084  
2.078  
2.059  
1.993  
1.791  
1.781  
1.766  
1.752  
1.740

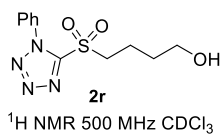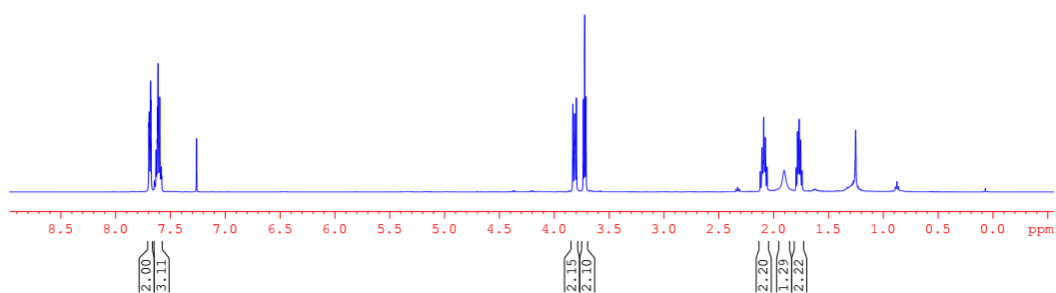

— 8.991

7.723  
7.708  
7.615  
7.600  
7.585  
7.560  
7.545  
7.530  
7.260

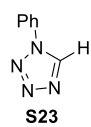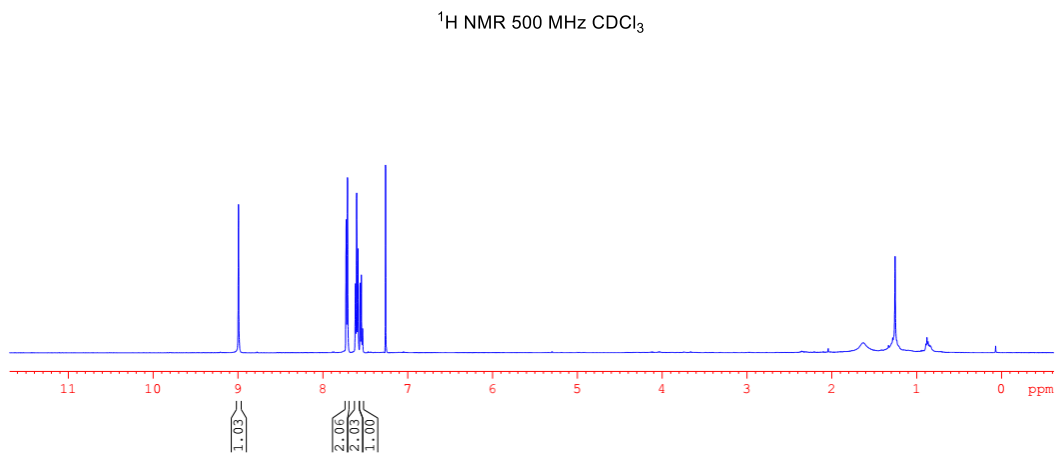

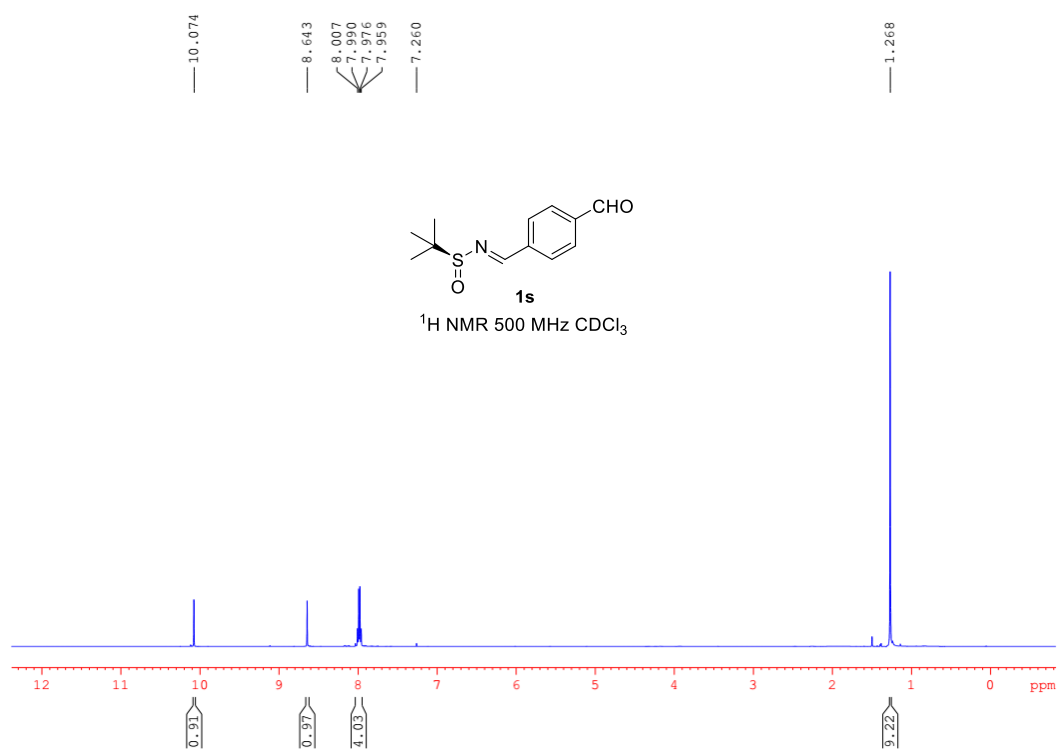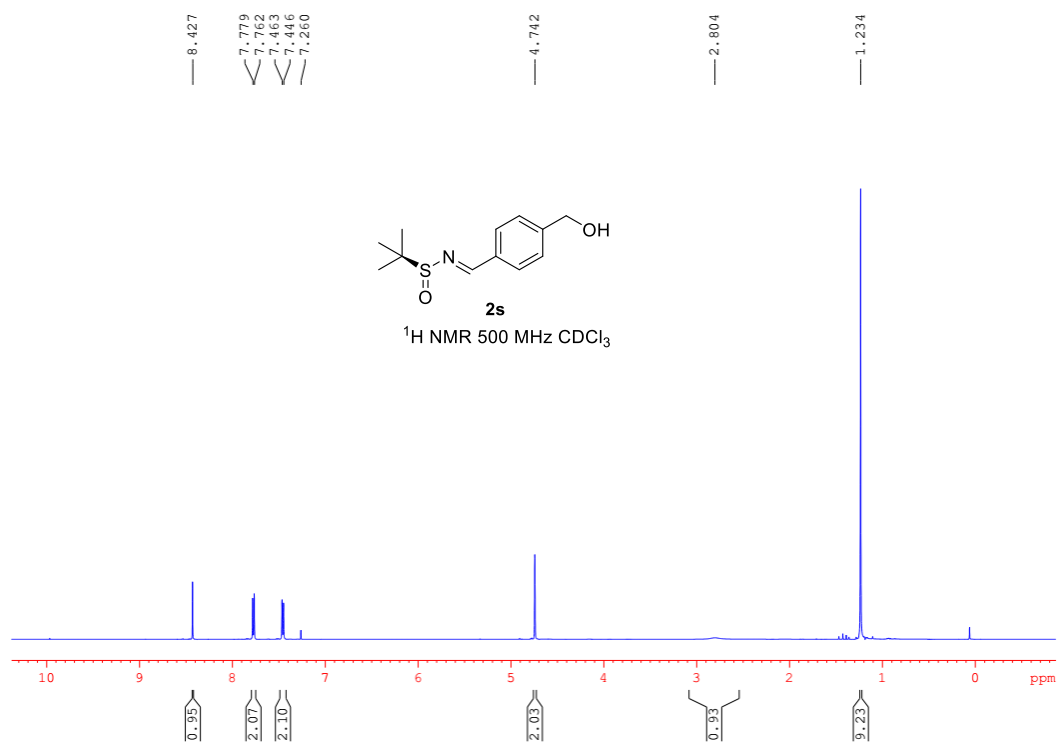

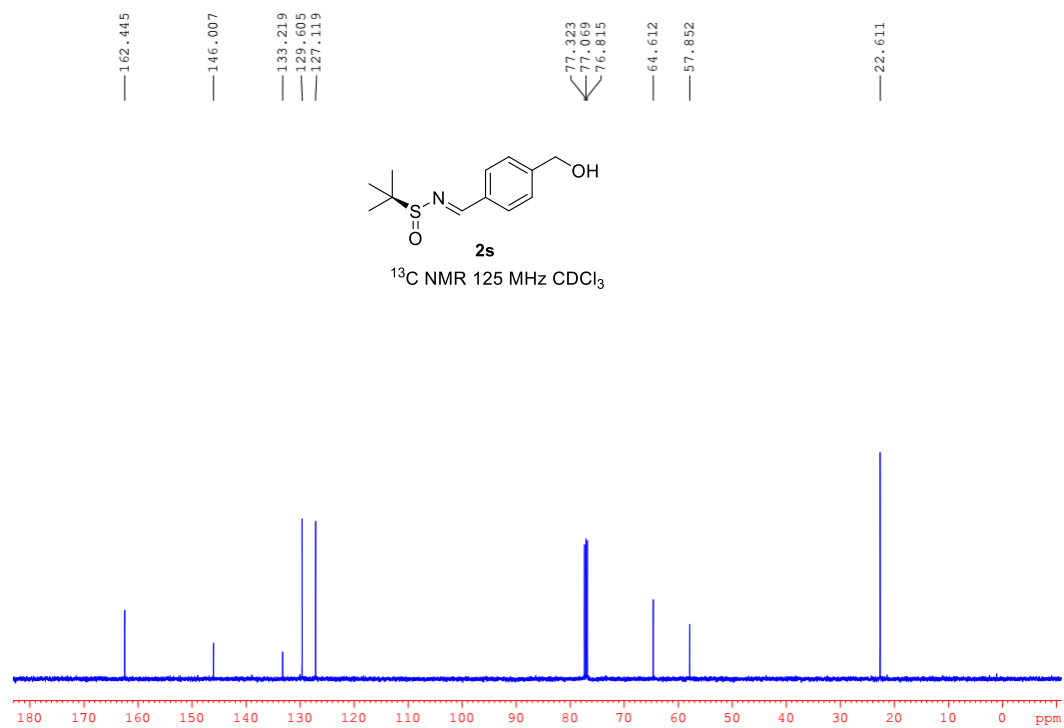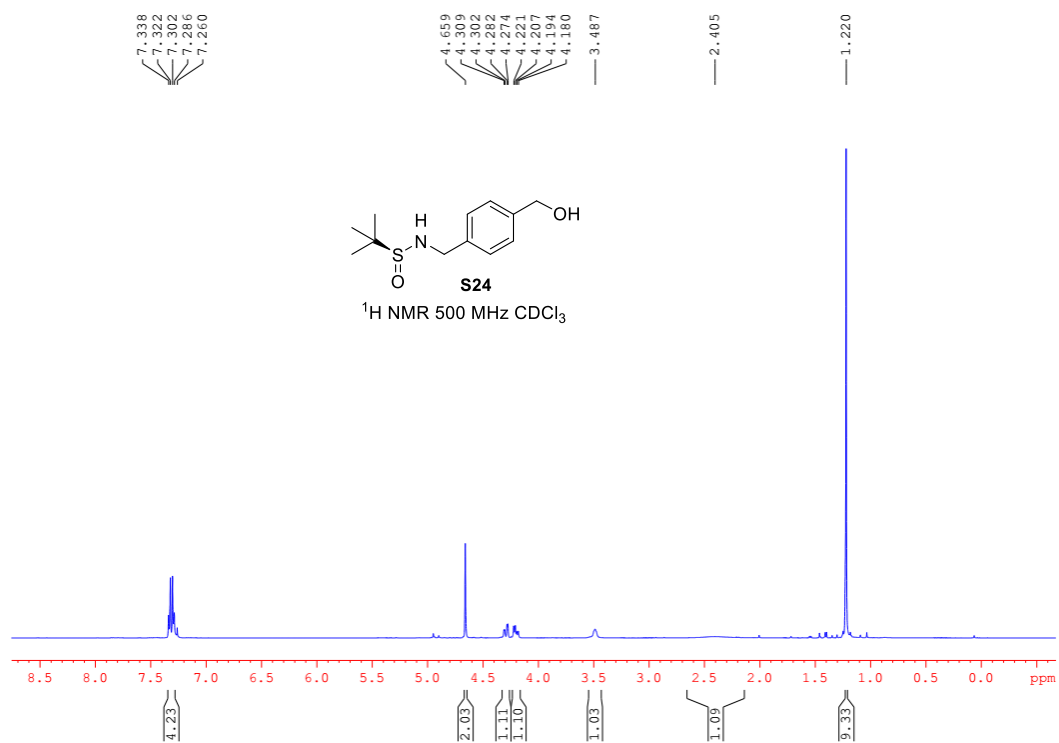

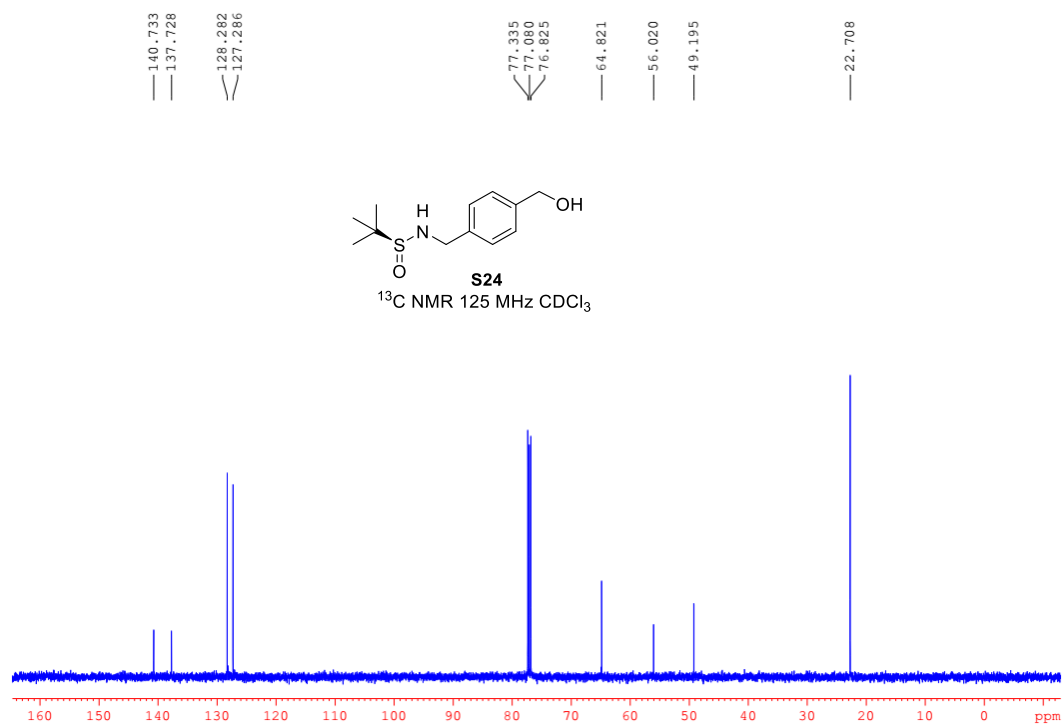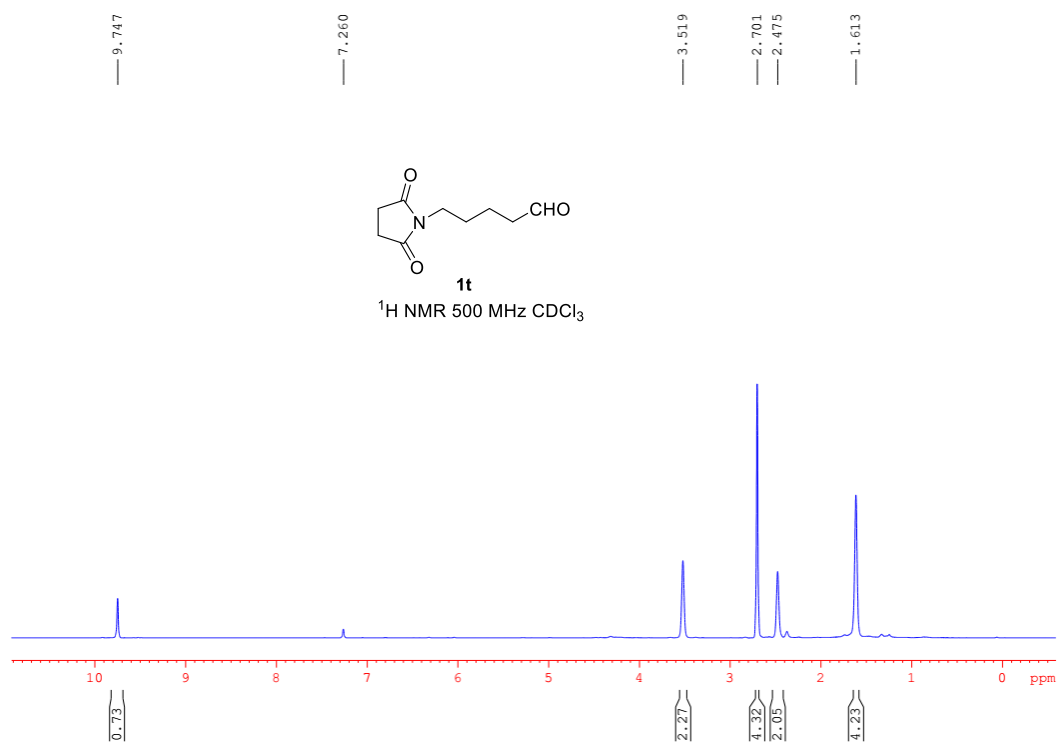

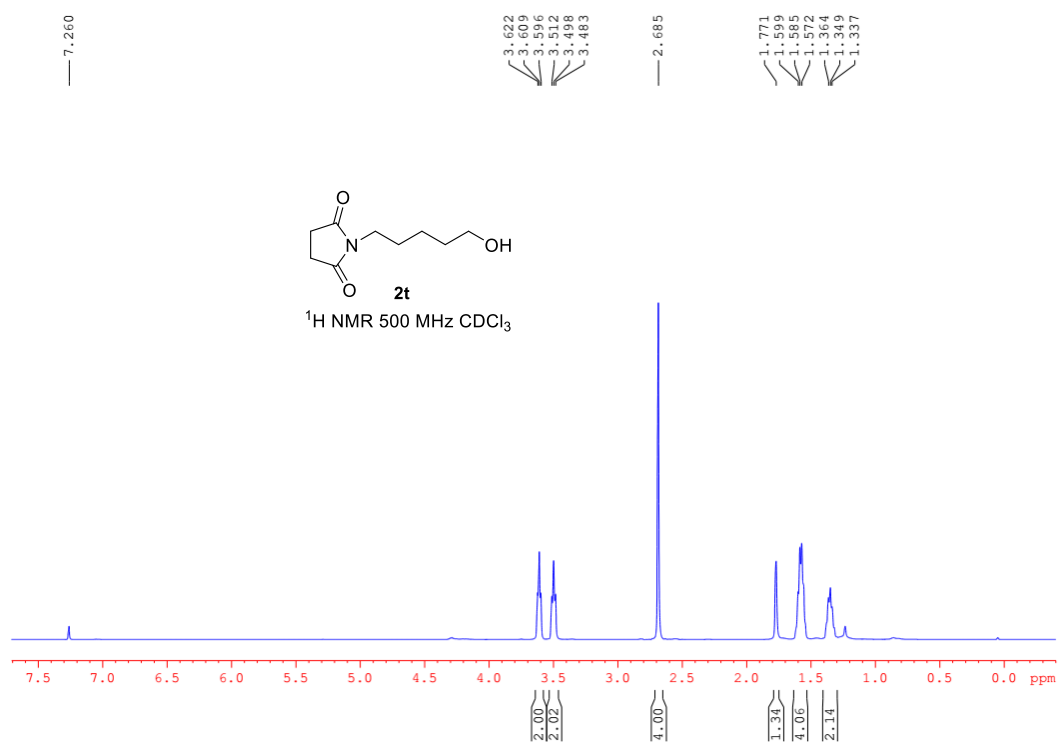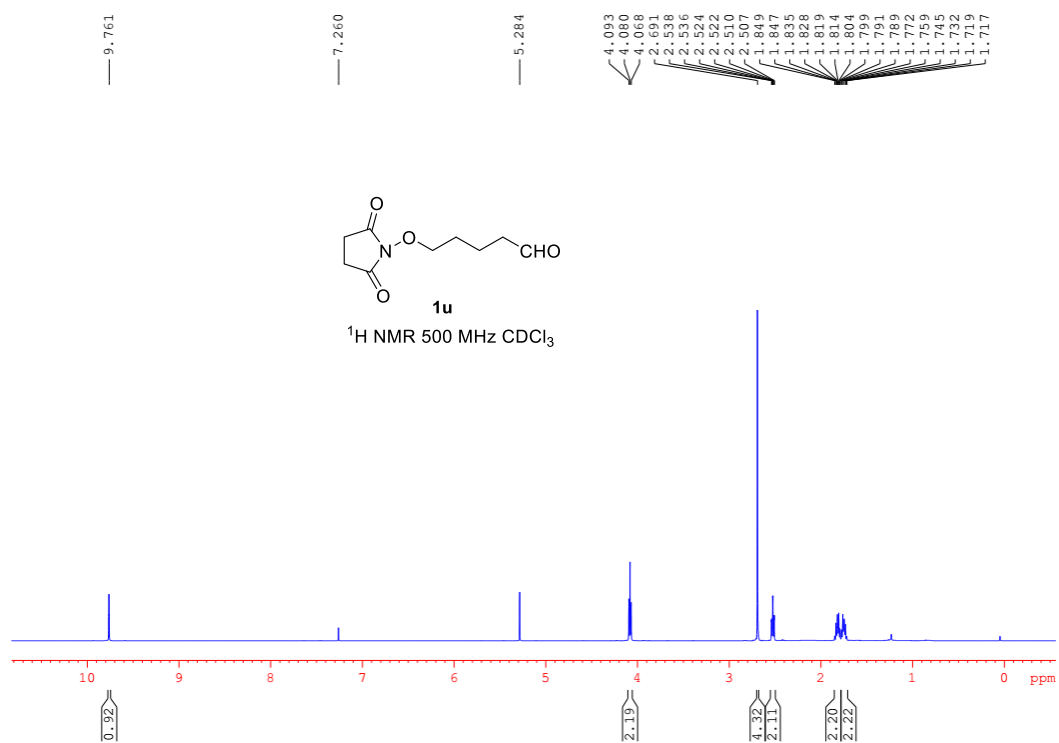

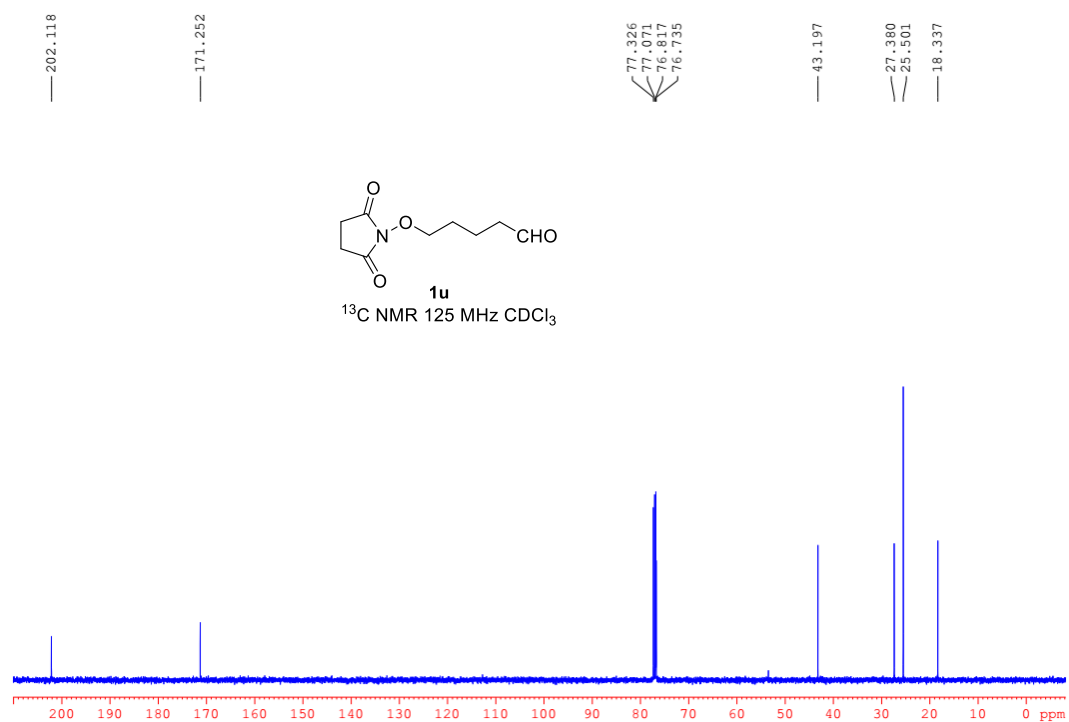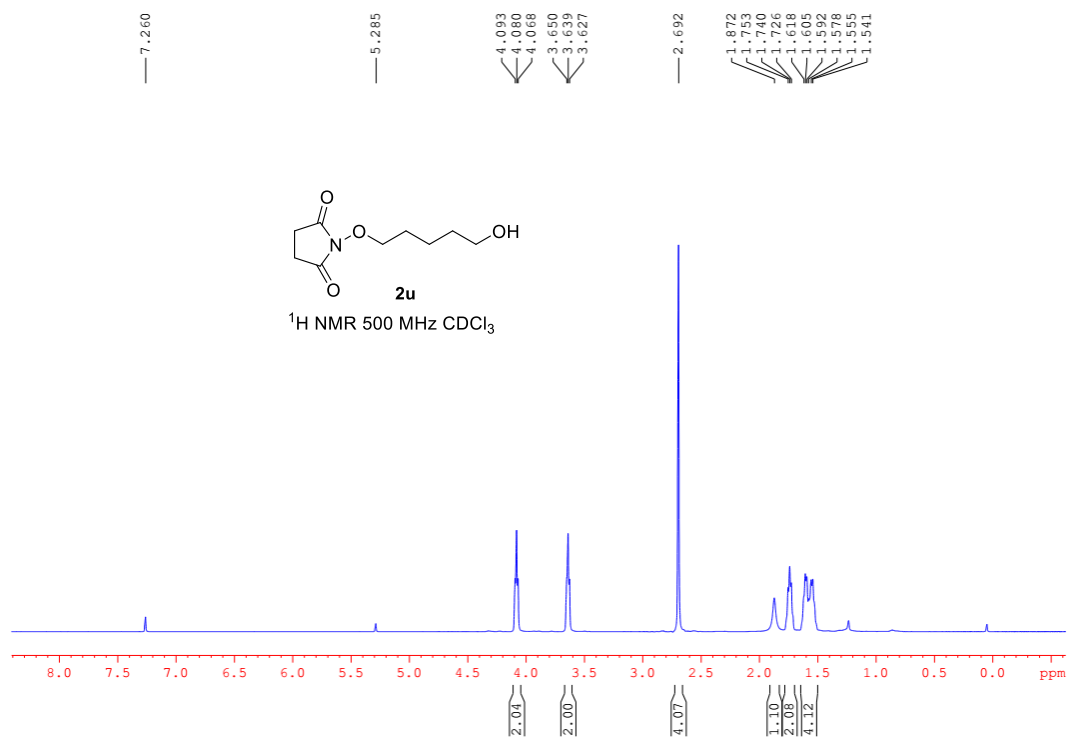

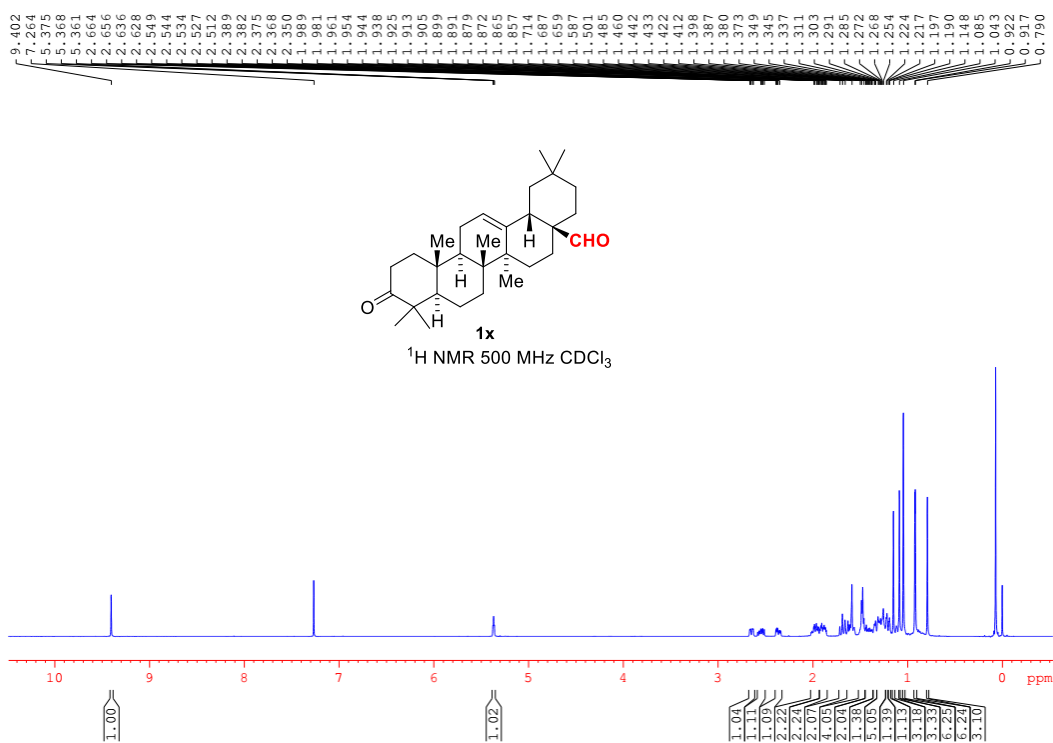

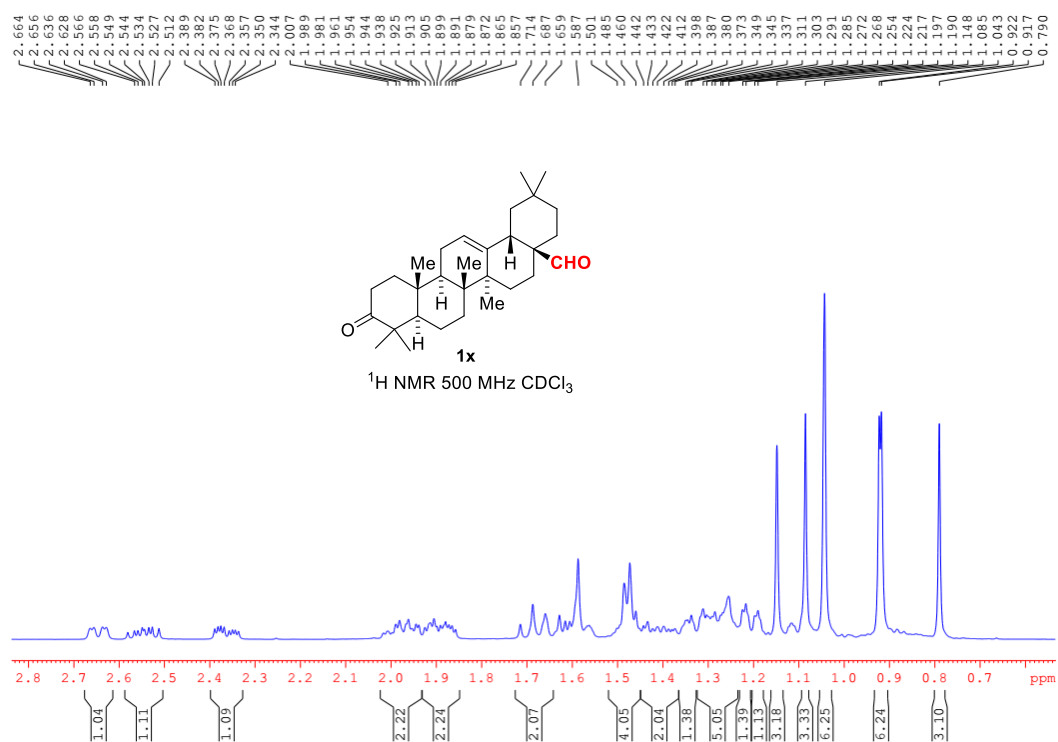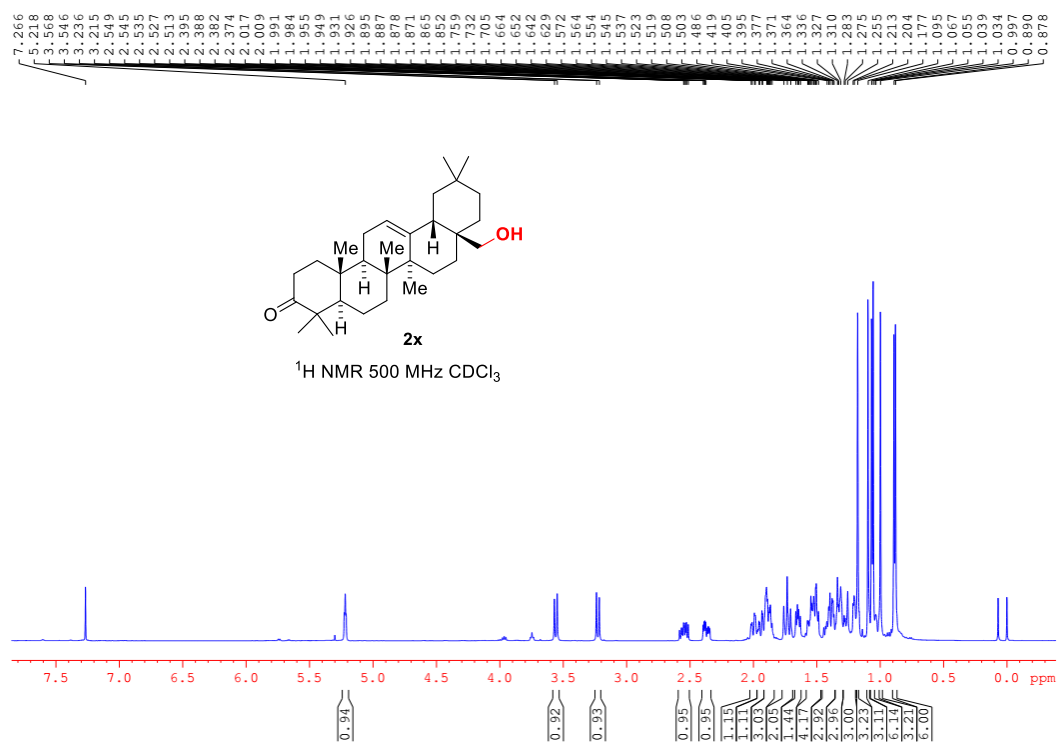

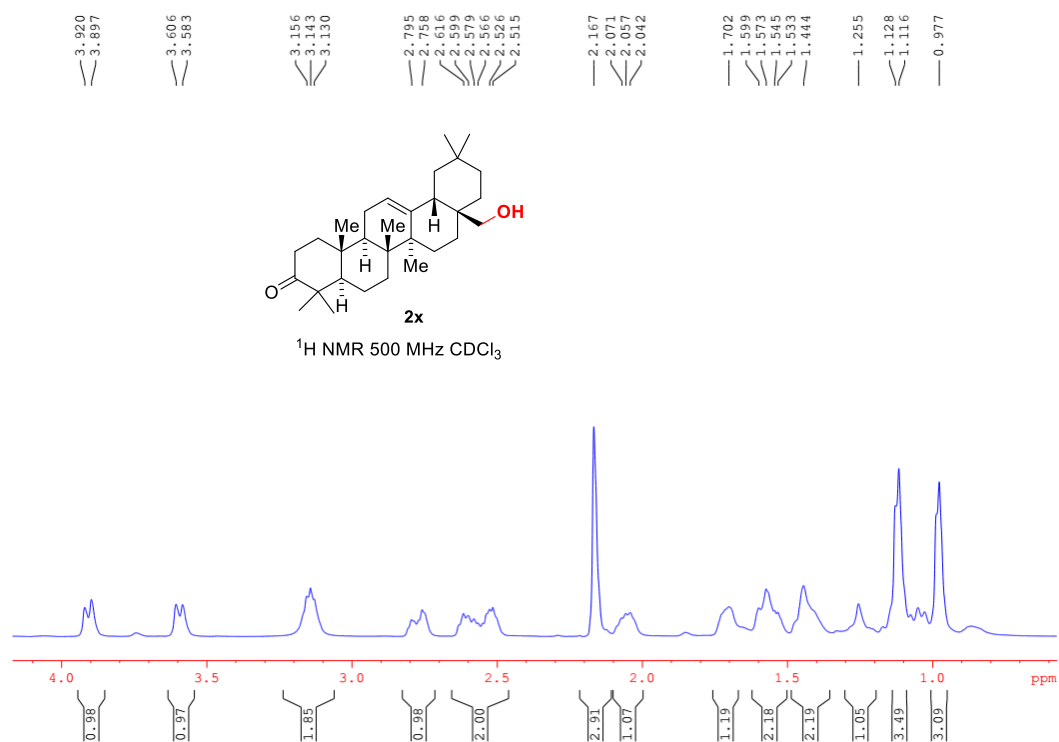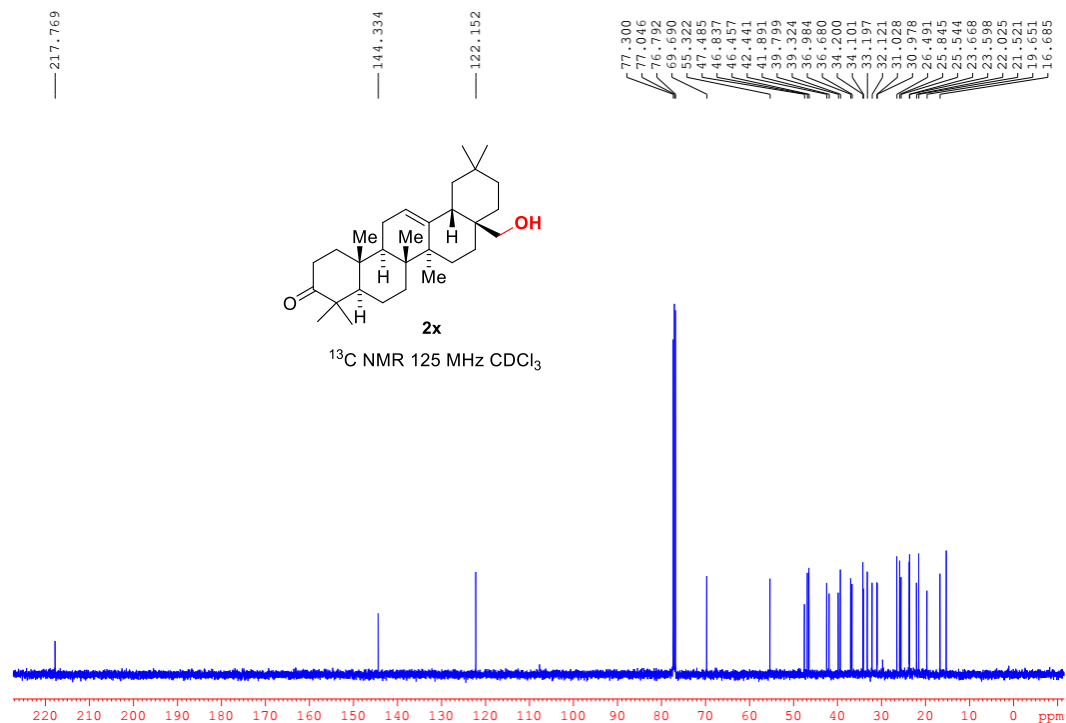

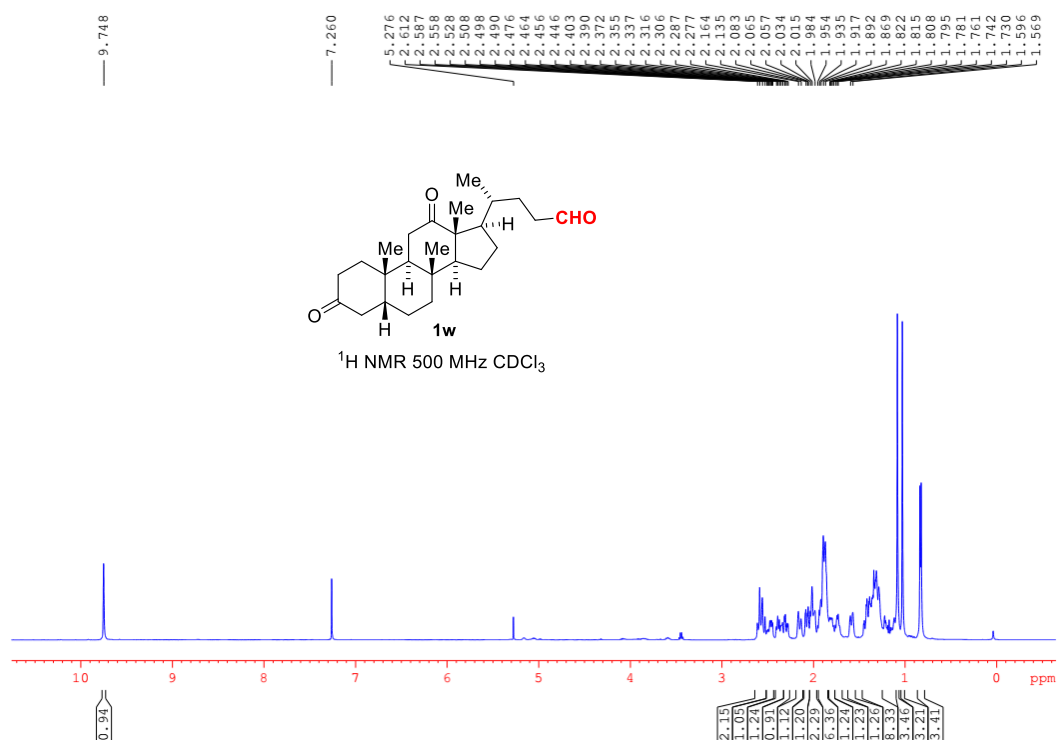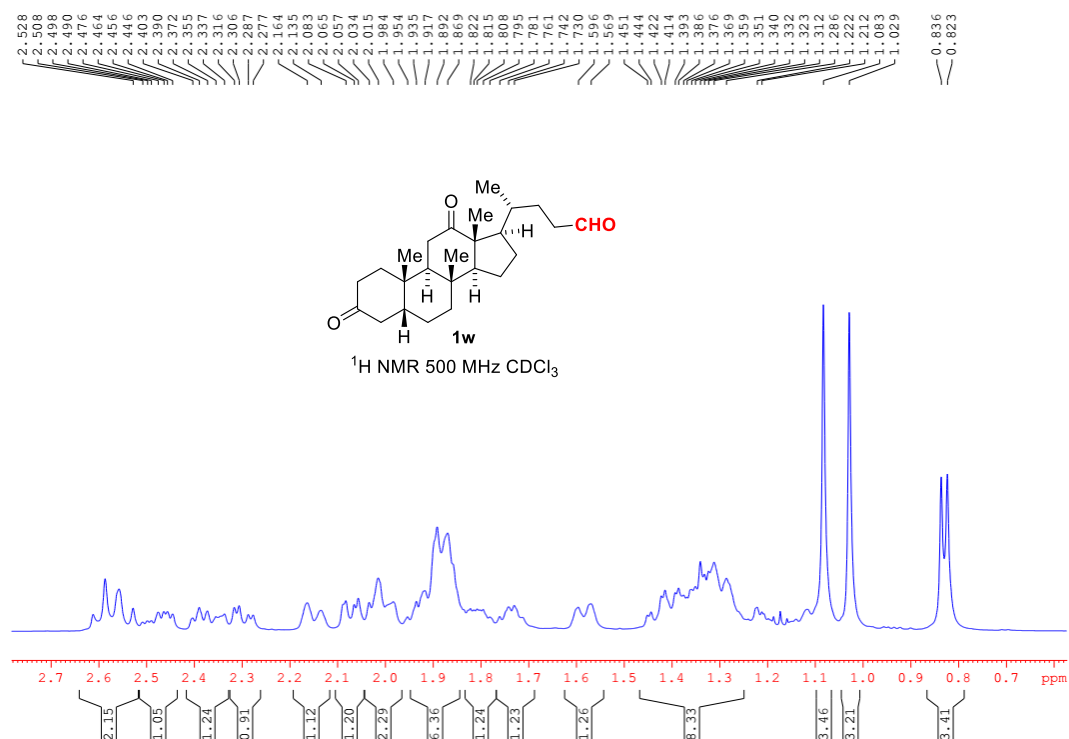

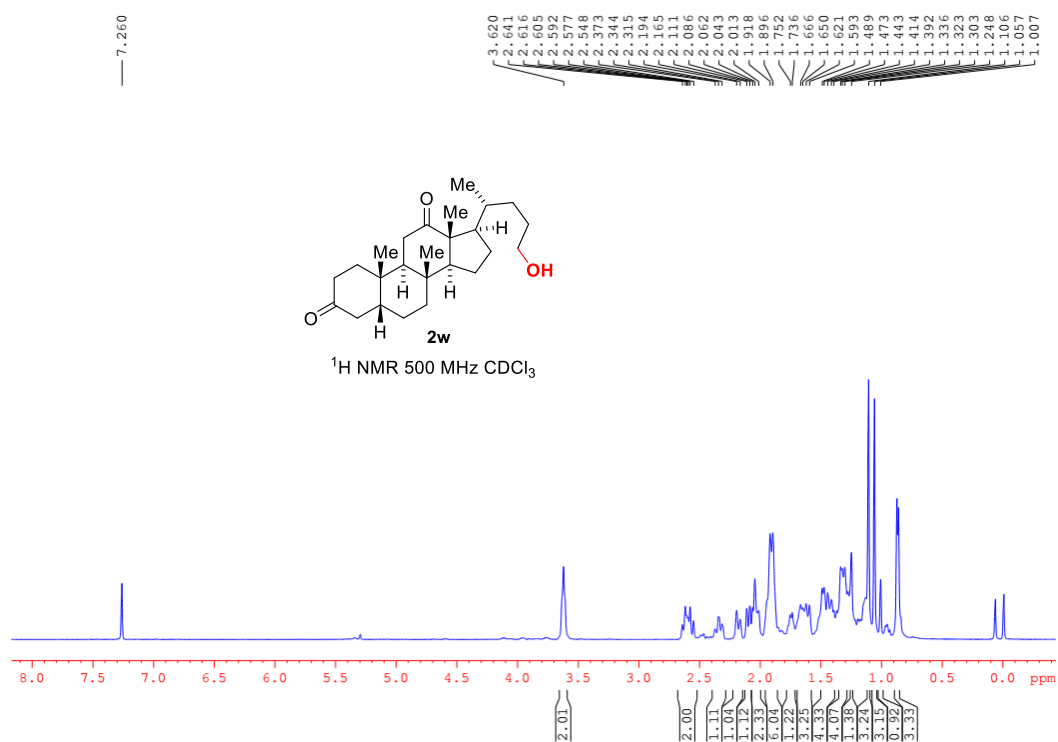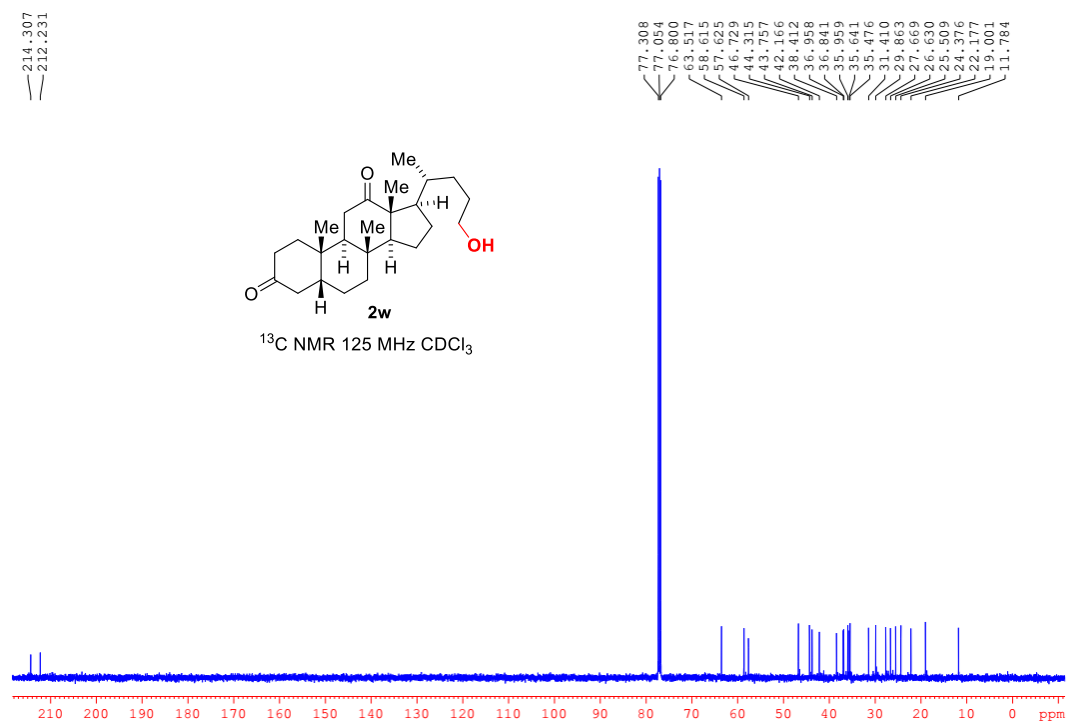

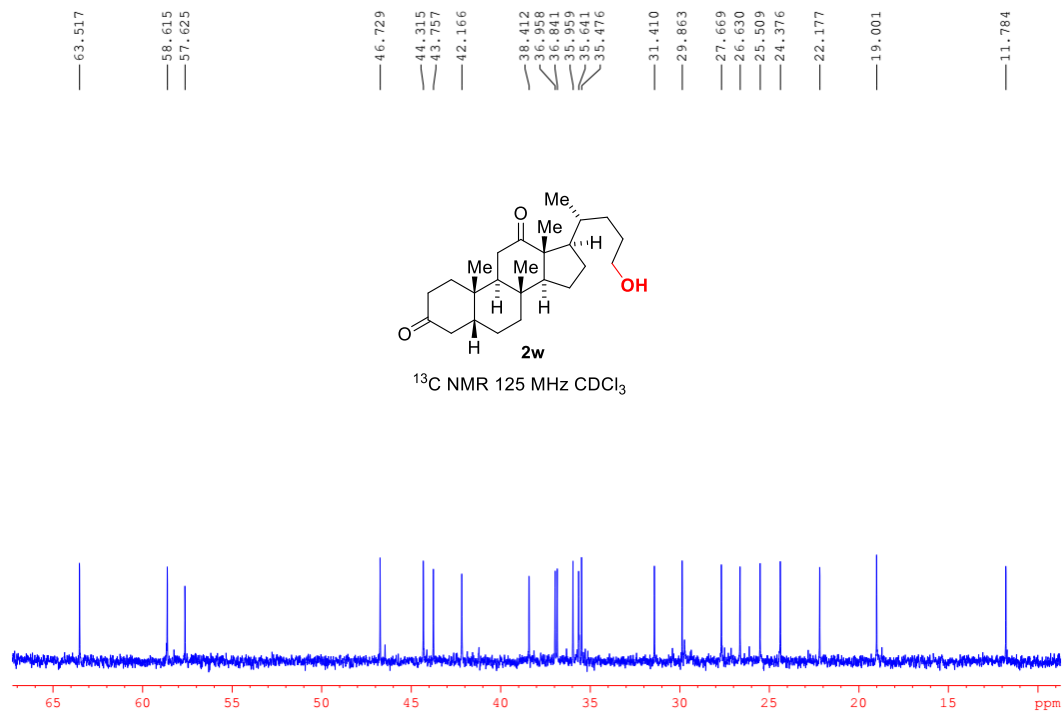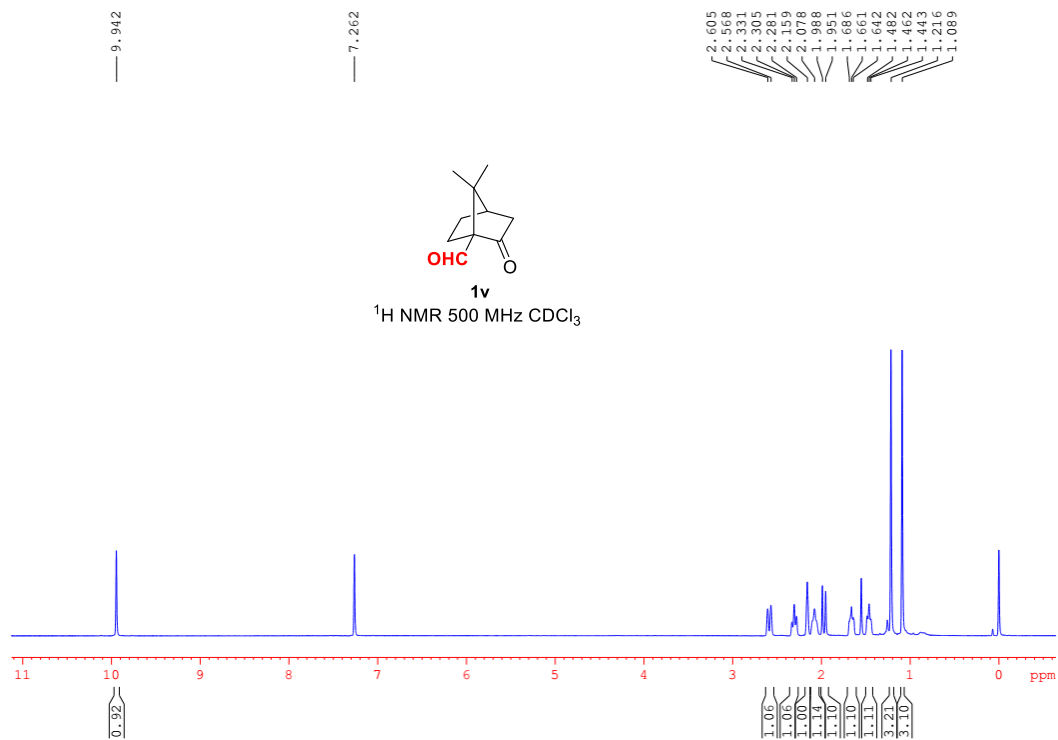

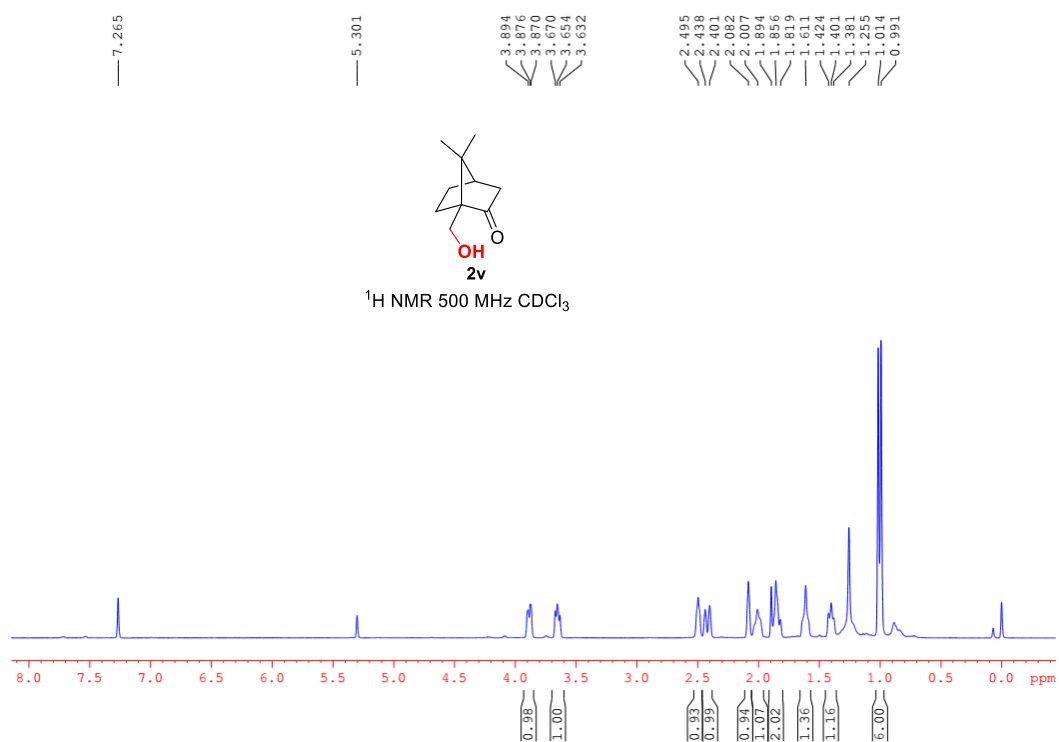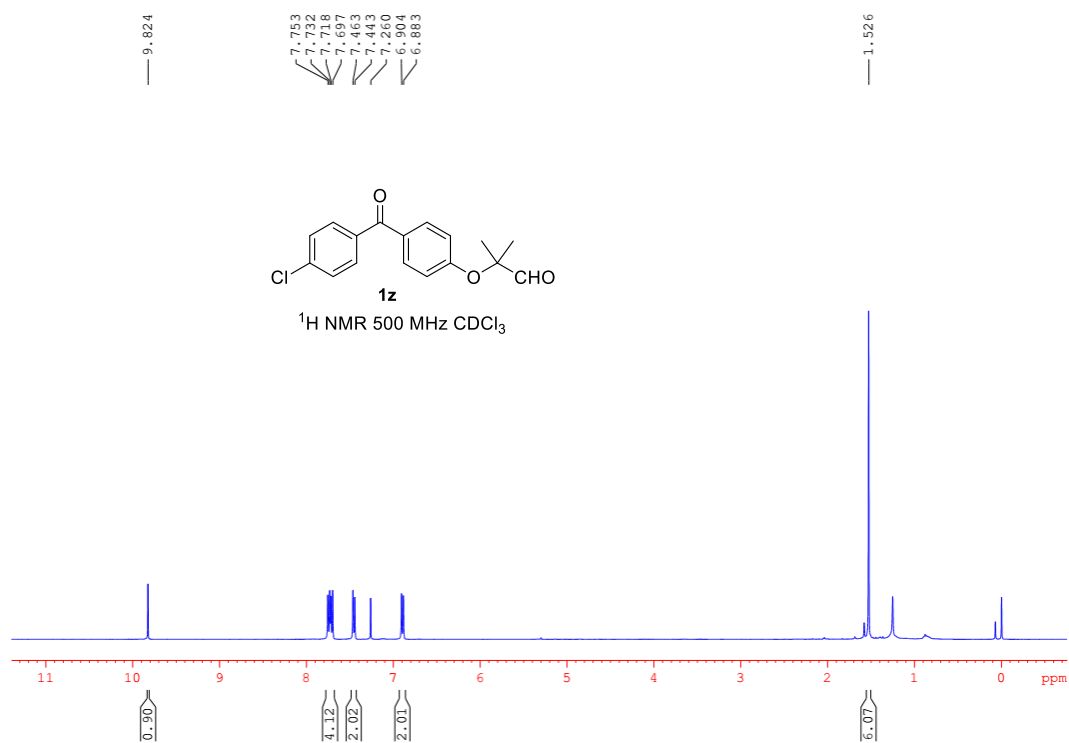

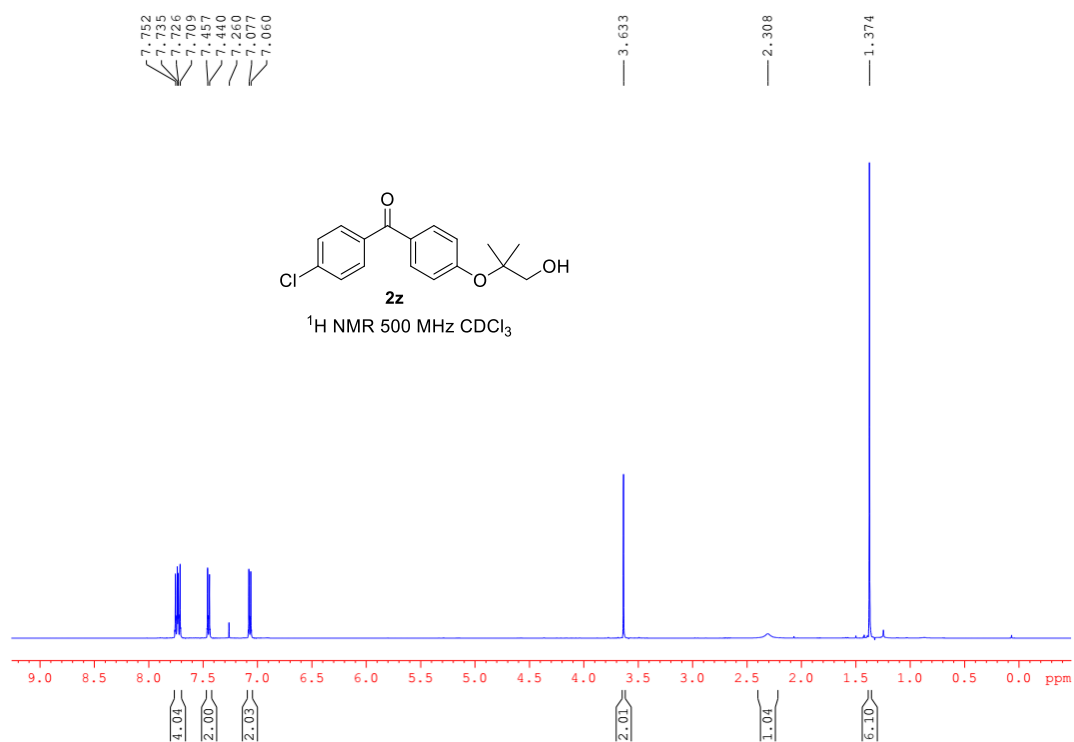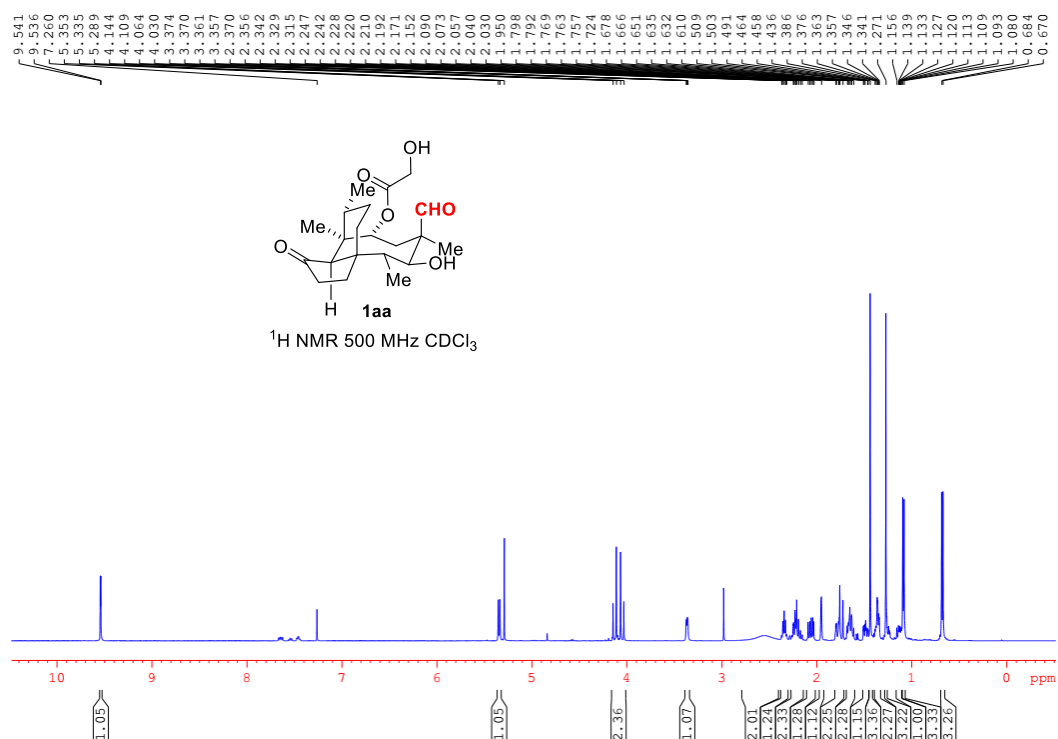

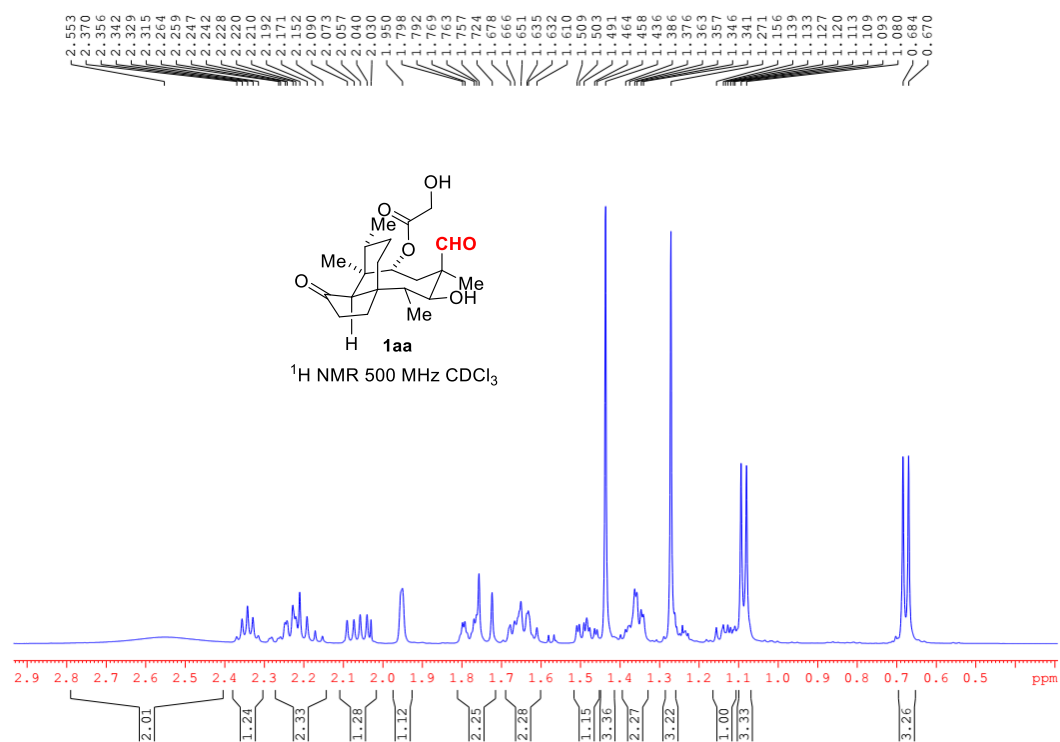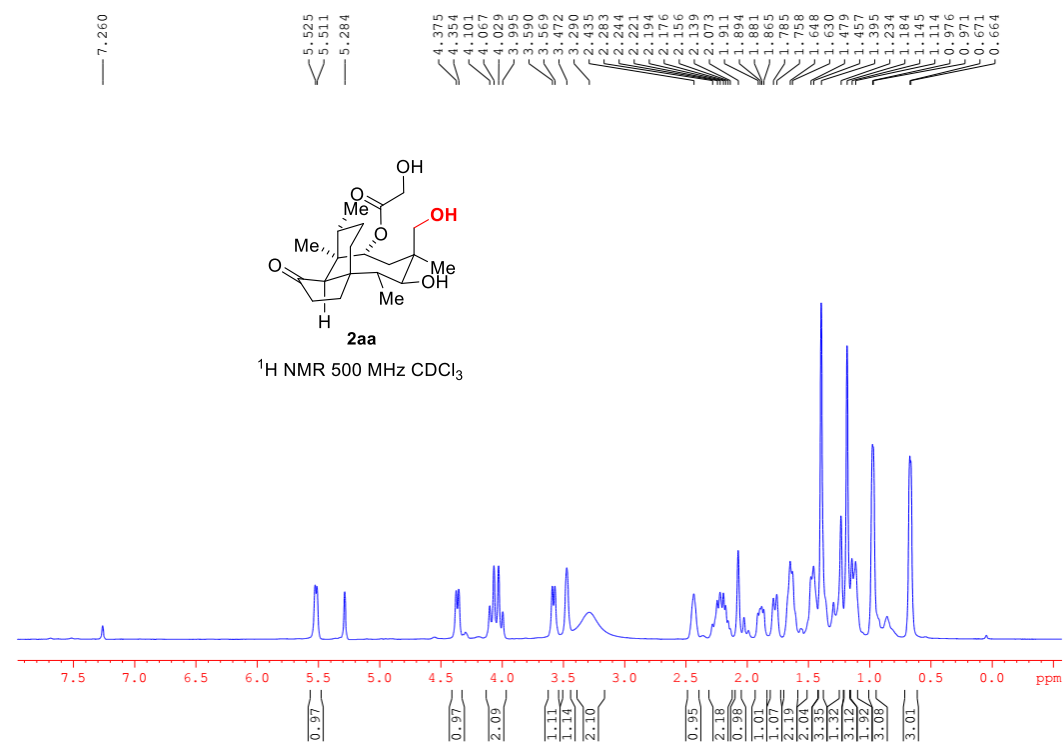

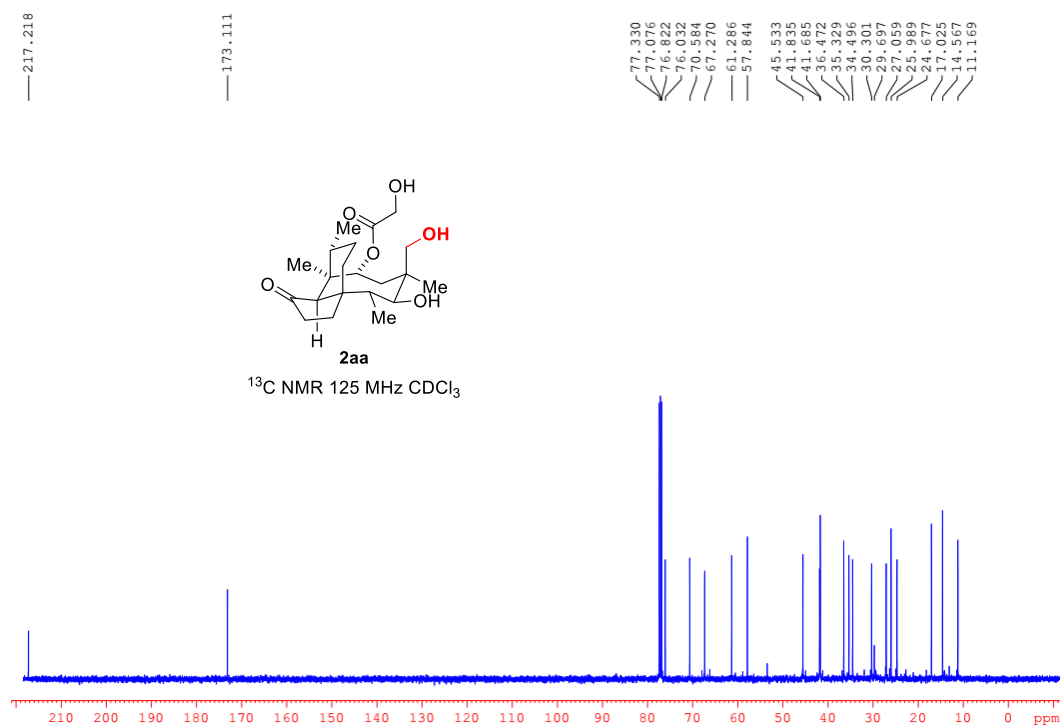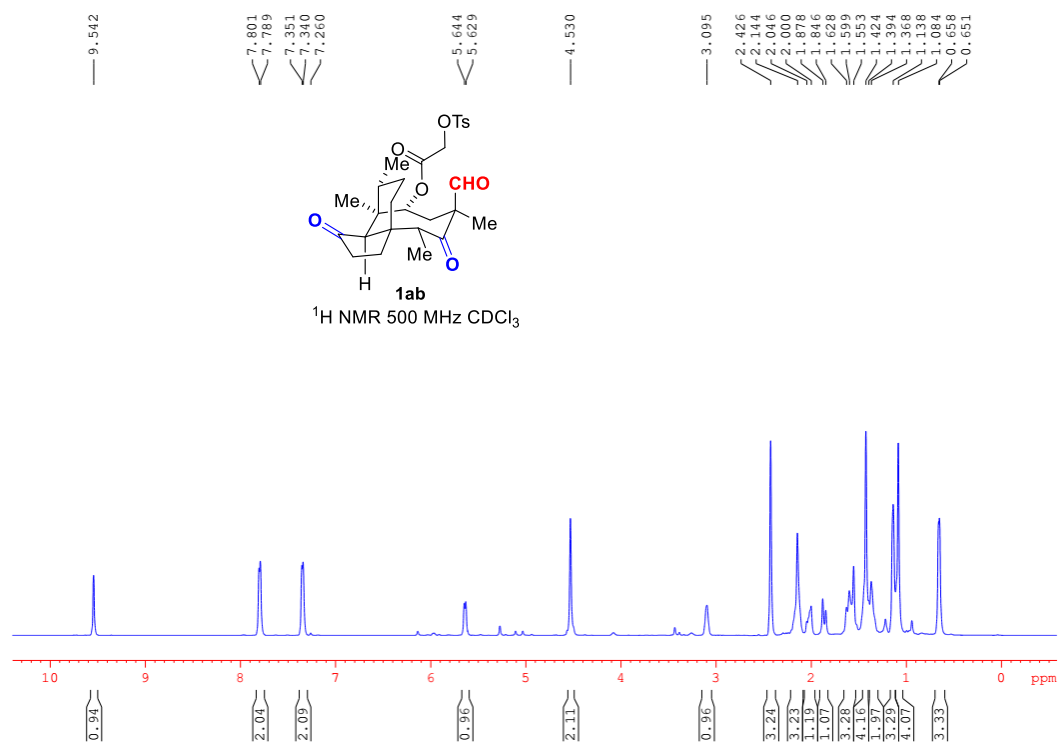

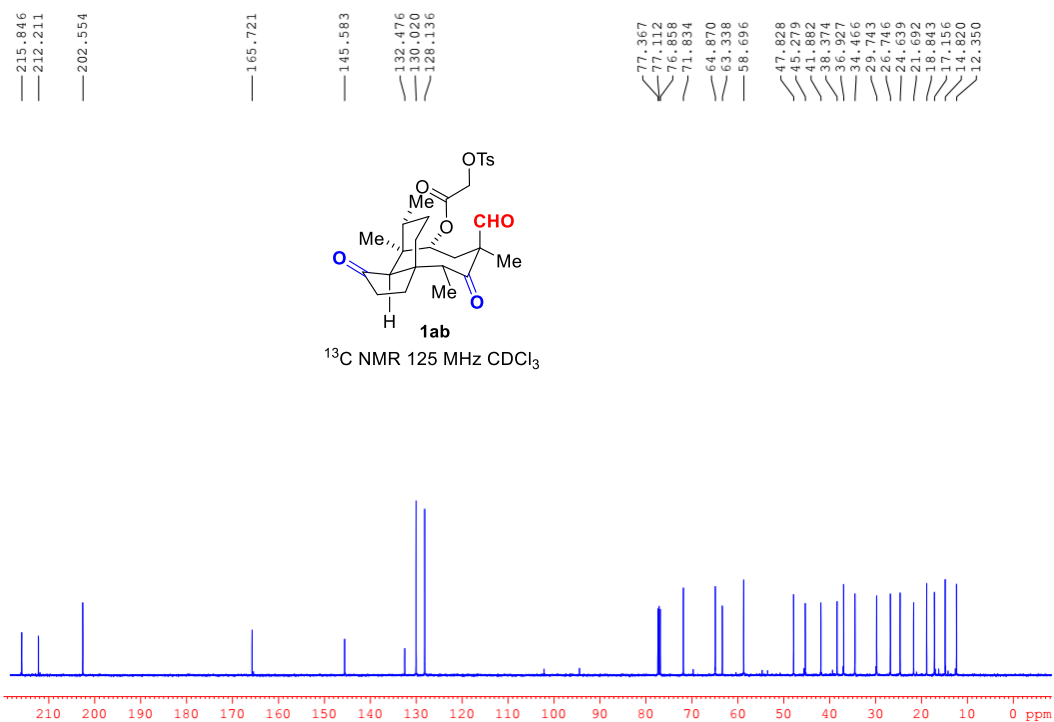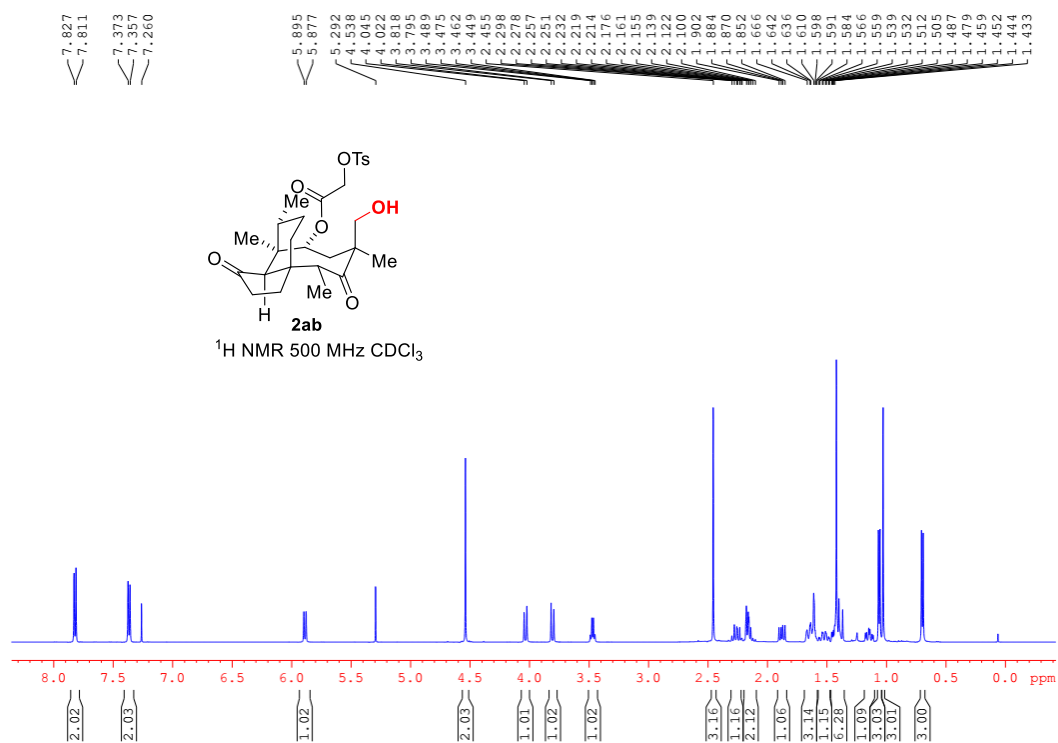

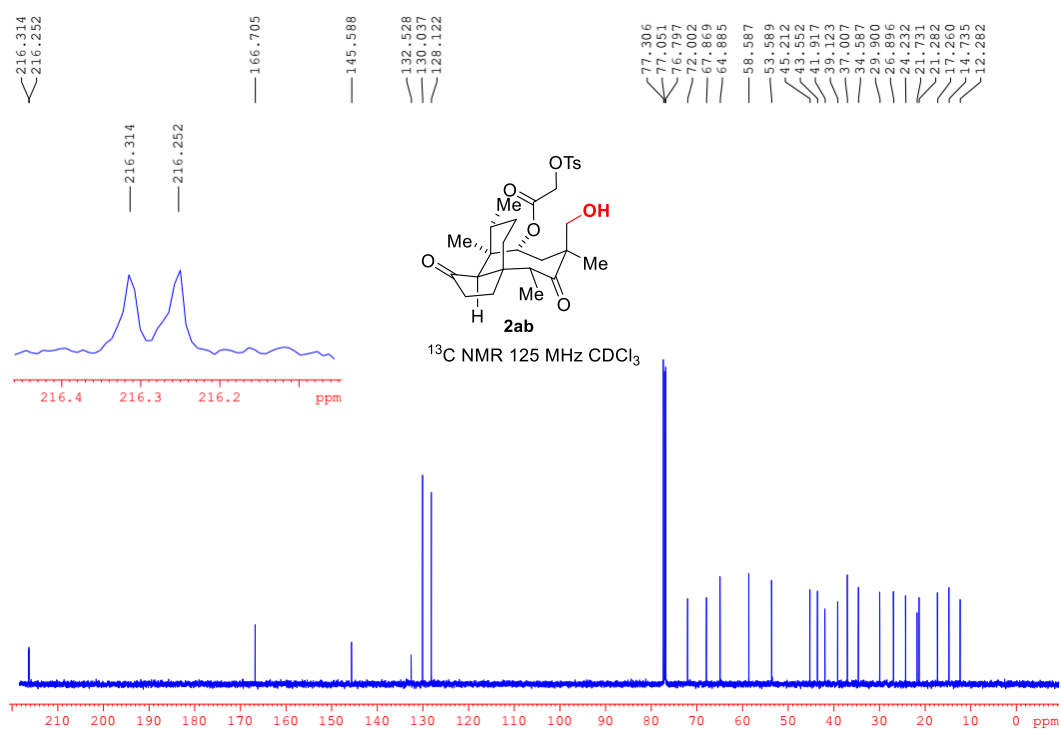

Supplement: c9nj03210j1.pdf [file c9nj03210j1.pdf]
